# Supplementary material for: Copper-catalyzed decarboxylation of α,α-difluoroarylacetic acid with 1,2,4-triazine-3,5(2H,4H)-dione
Source: Research Square preprint supplement (doi:10.21203/rs.3.rs-7624865/v1), 2025-10-28
Supplement: Supplementary file 1 [file 3b3ff2ef363cbb7d4b9f49f8.docx]

**Copper-catalyzed decarboxylation of α,α-difluoroarylacetic acid**

**with 1,2,4-triazine-3,5(2H,4H)-dione**

Yiwen Huo a, 1, Rongfei Liu a, 1, Yue Liub, 1,Qinjiang Zhoua, Yanna Lva, *, Jinxing Hua, *

a School of Pharmacy, Shandong Second Medical University, Weifang, Shandong, 261053, PR China.

b School of Basic Medical Sciences, Shandong Second Medical University, Weifang, Shandong, 261053, PR China.

*Corresponding author.

1. *mail address:* lynlyna@163.com (Y. Lv), jinxinghu2013@sdsmu.edu.cn (J. Hu).

1 these authors contributed equally to this work

**General experimental procedure**

In a Schlenk tube, 1,2,4-triazine-3,5(2H,4H)-dione (**1**, 0.5 mmol), α,α-difluoroarylacetic acid (**2**, 0.75 mmol), CuI (20 mol%), NaHCO3 (1.0 mmol), (NH4)2S2O8 (2.0 mmol), and DMSO (2.0 mL) were sequentially added, and the mixture was purged with nitrogen. The reaction mixture was then heated to 60°C and maintained at this temperature for 4 h, with the progress of the reaction monitored by TLC. Upon completion of the reaction, water was added to the mixture, which was subsequently extracted with dichloromethane (30 mL) and washed with saturated sodium chloride solution (10 mL × 3). The organic layer was dried over anhydrous Na2SO4 and concentrated under vacuum. The residue was purified by silica gel column chromatography using a petroleum ether/ethyl acetate eluent to yield the desired 6-substituted 1,2,4-triazine-3,5(2H,4H)-dione (**3**).

***6-(difluoro(phenyl)methyl)-2,4-dimethyl-1,2,4-triazine-3,5(2H,4H)-dione (3a)***

Yield: 86% ; White solid; m. p. 100.7-102.1℃. 1H NMR (400 MHz, CDCl3) δ 7.63 (d, *J* = 5.9 Hz, 2H), 7.46 (s, 3H), 3.70 (s, 3H), 3.31 (s, 3H). 13C NMR (101 MHz, CDCl3) δ 153.24, 148.93, 137.24, 136.93, 136.63, 134.55, 134.29, 134.02, 130.52, 128.37, 125.91, 125.85, 125.79, 119.09, 116.64, 114.19, 40.16, 27.29. 19F NMR (376 MHz, CDCl3) δ -98.04. HRMS (ESI-Q-TOF, m/z) calcd for C12H11N3O2F2Na [M+Na]+: 290.0717, found [M+Na]+: 290.0714.

***2,4-di(but-2-yn-1-yl)-6-(difluoro(phenyl)methyl)-1,2,4-triazine-3,5(2H,4H)-dione (3b)***

Yield: 38% ; White solid; m.p.113.6-115.0℃. 1H NMR (400 MHz, CDCl3) δ 7.65 (d, *J* = 6.7 Hz, 2H), 7.45 (d, *J* = 5.9 Hz, 3H), 4.74 (s, 2H), 4.58 (s, 2H), 1.84 (s, 3H), 1.76 (s, 3H). 13C NMR (101 MHz, CDCl3) δ 152.05, 147.39, 138.06, 137.75, 137.44, 134.37, 134.11, 133.85, 130.55, 128.36, 126.05, 125.99, 125.94, 119.02, 116.57, 114.11, 82.37, 79.95, 71.57, 71.31, 42.75, 30.75, 3.64. 19F NMR (376 MHz, CDCl3) δ -97.84. HRMS (ESI-Q-TOF, m/z) calcd for C18H15N3O2F2Na [M+Na]+: 366.1030, found [M+Na]+: 366.1034.

***Diethyl 2,2'-(6-(difluoro(phenyl)methyl)-3,5-dioxo-1,2,4-triazine-2,4(3H,5H)-diyl)diacetate (3c)***

Yield: 50% ; White solid; m.p.80.1-81.7℃. 1H NMR (400 MHz, CDCl3) δ 7.60 (d, *J* = 6.5 Hz, 2H), 7.45 (d, *J* = 6.7 Hz, 3H), 4.76 (s, 2H), 4.61 (s, 2H), 4.27 (d, *J* = 7.1 Hz, 2H), 4.19 (d, *J* = 7.1 Hz, 2H), 1.31 (t, *J* = 7.1 Hz, 3H), 1.24 (t, *J* = 7.1 Hz, 3H). 13C NMR (101 MHz, CDCl3) δ 166.70, 166.00, 152.28, 148.29, 138.30, 137.99, 137.68, 134.12, 133.86, 133.60, 130.67, 128.47, 125.88, 125.82, 125.77, 118.86, 116.41, 113.94, 62.22, 62.12, 53.09, 41.49, 14.09, 13.99. 19F NMR (376 MHz, CDCl3) δ -97.81. HRMS (ESI-Q-TOF, m/z) calcd for C18H19N3O6F2Na [M+Na]+: 434.1140, found [M+Na]+: 434.1137.

***6-(difluoro(phenyl)methyl)-2,4-dipentyl-1,2,4-triazine-3,5(2H,4H)-dione (3d)***

Yield: 49% ; White solid; m.p. 117.1-118.4℃. 1H NMR (400 MHz, CDCl3) δ 7.61 (d, *J* = 5.8 Hz, 2H), 7.45 (d, *J* = 5.3 Hz, 3H), 3.99 (t, *J* = 7.1 Hz, 2H), 3.90 – 3.80 (m, 2H), 1.75 (dd, *J* = 14.1, 7.1 Hz, 2H), 1.60 (d, *J* = 7.1 Hz, 2H), 1.32 (dd, *J* = 12.3, 5.8 Hz, 8H), 0.94 – 0.85 (m, 6H). 13C NMR (101 MHz, CDCl3) δ 152.91, 148.53, 137.30, 137.00, 136.69, 134.76, 134.50, 134.23, 130.41, 128.96, 128.55, 128.34, 125.86, 125.80, 125.75, 119.30, 116.85, 114.40, 52.22, 41.21, 28.94, 28.47, 27.73, 26.72, 22.34, 22.22, 13.92, 13.90. 19F NMR (376 MHz, CDCl3) δ -97.93. HRMS (ESI-Q-TOF, m/z) calcd for C20H27N3O2F2Na [M+Na]+: 402.1969, found [M+Na]+: 402.1966.

***2,4-bis(cyclopropylmethyl)-6-(difluoro(phenyl)methyl)-1,2,4-triazine-3,5(2H,4H)-dione (3e)***

Yield: 39% ; White solid; m.p.103.7-104.5℃. 1H NMR (400 MHz, CDCl3) δ 7.61 (d, *J* = 6.3 Hz, 2H), 7.46 (s, 3H), 3.85 (d, *J* = 7.2 Hz, 2H), 3.79 (d, *J* = 7.1 Hz, 2H), 1.27 – 1.19 (m, 2H), 0.55 (d, *J* = 7.1 Hz, 2H), 0.48 (d, *J* = 7.2 Hz, 2H), 0.41 – 0.33 (m, 4H). 13C NMR (101 MHz, CDCl3) δ 153.22, 148.89, 137.43, 137.12, 136.81, 134.79, 134.53, 134.26, 130.39, 129.01, 128.53, 128.30, 126.59, 125.93, 125.87, 125.82, 125.45, 119.48, 117.04, 114.60, 56.95, 45.73, 9.94, 9.30, 3.95, 3.57. 19F NMR (376 MHz, CDCl3) δ -97.78. HRMS (ESI-Q-TOF, m/z) calcd for C18H19N3O2F2Na [M+Na]+: 370.1343, found [M+Na]+: 370.1342.

***2,4-dibenzyl-6-(difluoro(phenyl)methyl)-1,2,4-triazine-3,5(2H,4H)-dione (3f)***

Yield: 41% ; White solid; m.p.97.8-98.7℃. 1H NMR (400 MHz, CDCl3) δ 7.56 (d, *J* = 7.0 Hz, 2H), 7.46 (s, 5H), 7.35 – 7.28 (m, 8H), 5.07 (s, 2H), 5.02 (s, 2H). 13C NMR (101 MHz, CDCl3) δ 152.82, 148.50, 137.94, 137.63, 137.31, 135.01, 134.71, 134.50, 134.24, 133.98, 130.48, 129.71, 129.47, 129.06, 128.83, 128.72, 128.66, 128.62, 128.35, 128.31, 128.08, 126.00, 125.94, 125.88, 119.47, 117.03, 114.60, 55.80, 44.39. 19F NMR (376 MHz, CDCl3) δ -97.71. HRMS (ESI-Q-TOF, m/z) calcd for C24H19N3O2F2Na [M+Na]+: 442.1343, found [M+Na]+: 442.1343.

***6-(difluoro(phenyl)methyl)-2,4-bis(4-fluorobenzyl)-1,2,4-triazine-3,5(2H,4H)-dione (3g)***

Yield: 56% ; White solid; m.p.110.5-111.2℃. 1H NMR (400 MHz, CDCl3) δ 7.55 (d, *J* = 7.3 Hz, 2H), 7.46 (d, *J* = 4.0 Hz, 5H), 7.35 – 7.27 (m, 2H), 7.00 (dt, *J* = 16.2, 8.1 Hz, 4H), 5.03 (s, 2H), 4.98 (s, 2H). 13C NMR (101 MHz, CDCl3) δ 164.11, 163.88, 161.65, 161.42, 152.69, 148.41, 137.79, 137.47, 134.61, 134.38, 134.12, 133.86, 131.81, 131.72, 131.53, 131.45, 131.10, 131.01, 130.80, 130.76, 130.67, 130.55, 130.45, 130.42, 128.37, 125.96, 125.90, 125.84, 119.44, 117.00, 115.88, 115.67, 115.64, 115.43, 114.57, 54.99, 43.68. 19F NMR (376 MHz, CDCl3) δ -97.74, -112.87, -113.25. HRMS (ESI-Q-TOF, m/z) calcd for C24H17N3O2F4Na [M+Na]+: 478.1155, found [M+Na]+: 478.1156.

***2,4-bis(4-chlorobenzyl)-6-(difluoro(phenyl)methyl)-1,2,4-triazine-3,5(2H,4H)-dione (3h)***

Yield: 69% ; White solid; m.p.127.9-129.3℃. 1H NMR (400 MHz, CDCl3) δ 7.54 (d, *J* = 6.9 Hz, 2H), 7.47 (t, *J* = 8.7 Hz, 3H), 7.39 (d, *J* = 8.1 Hz, 2H), 7.34 – 7.26 (m, 4H), 7.24 (s, 2H), 5.03 (s, 2H), 4.97 (s, 2H). 13C NMR (101 MHz, CDCl3) δ 152.63, 148.37, 138.18, 137.86, 137.54, 134.75, 134.37, 134.05, 133.79, 133.31, 132.95, 131.22, 130.58, 130.52, 129.05, 128.85, 128.39, 125.95, 125.89, 125.83, 119.41, 116.95, 114.50, 55.05, 43.75. 19F NMR (376 MHz, CDCl3) δ -97.75. HRMS (ESI-Q-TOF, m/z) calcd for C24H17N3O2F2NaCl2 [M+Na]+: 510.0564, found [M+Na]+: 510.0561.

***2,4-bis(4-bromobenzyl)-6-(difluoro(phenyl)methyl)-1,2,4-triazine-3,5(2H,4H)-dione (3i)***

Yield: 80% ; White solid; m.p.132.0-133.2℃. 1H NMR (400 MHz, CDCl3) δ 7.54 (d, *J* = 8.0 Hz, 2H), 7.49 – 7.41 (m, 7H), 7.33 (d, *J* = 7.4 Hz, 2H), 7.19 (d, *J* = 7.7 Hz, 2H), 5.01 (s, 2H), 4.96 (s, 2H). 13C NMR (101 MHz, CDCl3) δ 152.61, 148.35, 138.24, 137.87, 137.56, 134.28, 134.02, 133.79, 133.42, 132.03, 131.82, 131.53, 130.81, 130.59, 128.39, 125.94, 125.88, 125.82, 122.94, 122.58, 116.93, 114.50, 55.11, 43.81. 19F NMR (376 MHz, CDCl3) δ -97.77. HRMS (ESI-Q-TOF, m/z) calcd for C24H17N3O2F2NaBr2 [M+Na]+: 597.9553, found [M+Na]+: 597.9551.

***6-(difluoro(phenyl)methyl)-2,4-bis(4-(trifluoromethyl)benzyl)-1,2,4-triazine-3,5(2H,4H)-dione (3j)***

Yield: 74% ; White solid; m.p.113.0-114.6℃. 1H NMR (400 MHz, CDCl3) δ 7.61 (d, *J* = 7.7 Hz, 2H), 7.55 (d, *J* = 10.2 Hz, 6H), 7.46 (dd, *J* = 17.9, 9.7 Hz, 5H), 5.13 (s, 2H), 5.06 (s, 2H). 13C NMR (101 MHz, CDCl3) δ 152.56, 148.40, 138.54, 138.21, 138.10, 134.18, 133.92, 133.66, 131.12, 130.79, 130.66, 130.46, 130.00, 129.40, 128.42, 126.83, 125.92, 125.86, 125.80, 125.72, 125.69, 125.65, 125.62, 125.27, 125.23, 122.56, 122.52, 119.32, 116.88, 114.42, 55.19, 43.95. 19F NMR (376 MHz, CDCl3) δ -62.73, -97.86. HRMS (ESI-Q-TOF, m/z) calcd for C26H17N3O2F8Na [M+Na]+: 578.1091, found [M+Na]+: 578.1091.

***6-(difluoro(phenyl)methyl)-2,4-bis(4-methylbenzyl)-1,2,4-triazine-3,5(2H,4H)-dione (3k)***

Yield: 65% ; White solid; m.p.155.3-156.6℃. 1H NMR (400 MHz, CDCl3) δ 7.56 (d, *J* = 7.3 Hz, 2H), 7.45 (d, *J* = 7.4 Hz, 3H), 7.36 (d, *J* = 7.6 Hz, 2H), 7.22 (d, *J* = 7.8 Hz, 2H), 7.12 (dd, *J* = 14.0, 7.7 Hz, 4H), 4.99 (d, *J* = 20.1 Hz, 4H), 2.33 (d, *J* = 13.8 Hz, 6H). 13C NMR (101 MHz, CDCl3) δ 152.86, 148.46, 138.46, 138.14, 137.83, 137.52, 137.21, 134.57, 134.31, 134.05, 132.12, 131.76, 130.45, 129.76, 129.48, 129.31, 129.05, 128.85, 128.68, 128.33, 126.01, 125.95, 125.90, 119.52, 117.06, 114.62, 55.58, 44.10, 21.23, 21.19. 19F NMR (376 MHz, CDCl3) δ -97.66. HRMS (ESI-Q-TOF, m/z) calcd for C26H23N3O2F2Na [M+Na]+: 470.1656, found [M+Na]+: 470.1653.

***6-(difluoro(phenyl)methyl)-2,4-bis(3-methylbenzyl)-1,2,4-triazine-3,5(2H,4H)-dione (3l)***

Yield: 47% ; White solid; m.p.100.3-101.7℃. 1H NMR (400 MHz, CDCl3) δ 7.57 (d, *J* = 7.0 Hz, 2H), 7.45 (d, *J* = 7.5 Hz, 3H), 7.25 – 7.07 (m, 8H), 5.01 (d, *J* = 19.4 Hz, 4H), 2.32 (d, *J* = 13.3 Hz, 6H). 13C NMR (101 MHz, CDCl3) δ 152.85, 148.51, 138.55, 138.38, 137.89, 137.58, 137.26, 134.96, 134.69, 134.57, 134.30, 134.04, 130.47, 130.25, 129.63, 129.33, 129.04, 128.71, 128.54, 128.33, 126.69, 126.05, 126.02, 125.96, 125.90, 119.54, 117.09, 114.66, 55.76, 44.33, 21.40, 21.36. 19F NMR (376 MHz, CDCl3) δ -98.01. HRMS (ESI-Q-TOF, m/z) calcd for C26H23N3O2F2Na [M+Na]+: 470.1656, found [M+Na]+: 470.1652.

***4-((6-(difluoro(phenyl)methyl)-4-(4-isocyanobenzyl)-3,5-dioxo-4,5-dihydro-1,2,4-triazin-2(3H)-yl)methyl)benzonitrile (3m)***

Yield: 64% ; White solid; m.p.151.9-152.6℃. 1H NMR (400 MHz, CDCl3) δ 7.64 (d, *J* = 7.6 Hz, 2H), 7.59 (d, *J* = 7.7 Hz, 2H), 7.54 (d, *J* = 5.6 Hz, 4H), 7.50 – 7.41 (m, 5H), 5.12 (s, 2H), 5.04 (s, 2H). 13C NMR (101 MHz, CDCl3) δ 152.48, 148.38, 139.62, 139.28, 138.59, 138.27, 137.94, 134.04, 133.78, 133.52, 132.69, 132.51, 130.75, 130.35, 129.73, 128.46, 125.90, 125.85, 125.79, 119.24, 118.39, 118.27, 116.79, 112.78, 112.40, 55.24, 44.06. 19F NMR (376 MHz, CDCl3) δ -97.99. HRMS (ESI-Q-TOF, m/z) calcd for C26H17N5O2F2Na [M+Na]+: 492.1248, found [M+Na]+: 492.1245.

***6-(difluoro(phenyl)methyl)-2,4-bis(4-nitrobenzyl)-1,2,4-triazine-3,5(2H,4H)-dione (3n)***

Yield: 29% ; White solid; m.p. 99.8-101.2℃. 1H NMR (400 MHz, CDCl3) δ 8.17 (dd, *J* = 21.9, 7.9 Hz, 4H), 7.60 (d, *J* = 7.9 Hz, 2H), 7.55 (d, *J* = 6.9 Hz, 2H), 7.48 (t, *J* = 8.5 Hz, 5H), 5.18 (s, 2H), 5.09 (s, 2H). 13C NMR (101 MHz, CDCl3) δ 152.47, 148.38, 148.08, 147.81, 141.51, 141.12, 138.39, 133.75, 130.77, 130.57, 129.96, 128.48, 125.91, 125.85, 125.79, 124.08, 123.88, 116.79, 54.93, 43.76. 19F NMR (376 MHz, CDCl3) δ -97.89. HRMS (ESI-Q-TOF, m/z) calcd for C24H17N5O6F2Na [M+Na]+: 532.1045, found [M+Na]+: 532.1041.

***6-(difluoro(phenyl)methyl)-2,4-bis(2-(4-fluorophenyl)-2-oxoethyl)-1,2,4-triazine-3,5(2H,4H)-dione (3o)***

Yield: 40% ; White solid; m.p.85.1-86.3℃. 1H NMR (400 MHz, CDCl3) δ 8.05 – 7.95 (m, 4H), 7.62 (d, *J* = 5.7 Hz, 2H), 7.46 (s, 3H), 7.24 – 7.13 (m, 4H), 5.47 (s, 2H), 5.30 (s, 2H). 13C NMR (101 MHz, CDCl3) δ 189.30, 188.20, 167.72, 167.59, 165.16, 165.04, 152.57, 148.69, 138.11, 137.81, 134.31, 133.95, 133.69, 130.94, 130.85, 130.73, 130.67, 130.56, 130.53, 130.15, 128.51, 128.41, 125.90, 125.85, 125.79, 118.97, 116.46, 116.30, 116.24, 116.08, 57.81, 46.44. 19F NMR (376 MHz, CDCl3) δ -97.51, -102.24, -102.69. HRMS (ESI-Q-TOF, m/z) calcd for C26H17N3O4F4Na [M+Na]+: 534.1053, found [M+Na]+: 534.1052.

***2,4-bis(2-(4-chlorophenyl)-2-oxoethyl)-6-(difluoro(phenyl)methyl)-1,2,4-triazine-3,5(2H,4H)-dione (3p)***

Yield: 55% ; White solid; m.p.100.2-101.3℃. 1H NMR (400 MHz, CDCl3) δ 7.90 (dd, *J* = 15.5, 8.3 Hz, 4H), 7.61 (d, *J* = 7.9 Hz, 2H), 7.53 – 7.44 (m, 7H), 5.46 (s, 2H), 5.29 (s, 2H). 13C NMR (101 MHz, CDCl3) δ 189.74, 188.64, 152.53, 148.64, 141.03, 140.79, 138.45, 138.14, 133.91, 133.65, 132.55, 132.38, 131.99, 130.69, 130.11, 129.52, 129.51, 129.45, 129.30, 128.84, 128.51, 126.44, 125.90, 125.84, 125.78, 116.51, 114.05, 57.85, 57.85, 46.49, 46.49. 19F NMR (376 MHz, CDCl3) δ -97.52. HRMS (ESI-Q-TOF, m/z) calcd for C26H17N3O4F2NaCl2 [M+Na]+: 566.0462, found [M+Na]+: 566.0461.

***6-(difluoro(phenyl)methyl)-2,4-bis(2-oxo-2-(4-(trifluoromethyl)phenyl)ethyl)-1,2,4-triazine-3,5(2H,4H)-dione (3q)***

Yield: 52% ; White solid; m.p.100.2-101.8℃. 1H NMR (400 MHz, CDCl3) δ 8.07 (dd, *J* = 16.6, 7.9 Hz, 4H), 7.79 (dd, *J* = 18.5, 7.9 Hz, 4H), 7.62 (d, *J* = 5.6 Hz, 2H), 7.47 (s, 3H), 5.51 (s, 2H), 5.34 (s, 2H). 13C NMR (101 MHz, CDCl3) δ 190.11, 189.08, 152.45, 148.60, 138.61, 138.30, 136.86, 136.68, 135.80, 135.59, 135.47, 135.26, 133.83, 133.57, 130.75, 128.53, 126.17, 126.14, 126.09, 126.04, 126.01, 125.88, 125.83, 125.77, 124.70, 121.97, 118.94, 116.48, 114.04, 58.06, 46.72. 19F NMR (376 MHz, CDCl3) δ -63.29, -97.56. HRMS (ESI-Q-TOF, m/z) calcd for C28H17N3O4F8Na [M+Na]+: 634.0989 , found [M+Na]+: 634.0991.

***6-(difluoro(phenyl)methyl)-2,4-bis(2-(4-methoxyphenyl)-2-oxoethyl)-1,2,4-triazine-3,5(2H,4H)-dione (3r)***

Yield: 67% ; White solid; m.p.90.5-91.5℃. 1H NMR (400 MHz, CDCl3) δ 7.94 (dd, *J* = 12.8, 8.7 Hz, 4H), 7.63 (d, *J* = 4.8 Hz, 2H), 7.45 (s, 3H), 6.97 (dd, *J* = 17.6, 8.3 Hz, 4H), 5.45 (s, 2H), 5.29 (s, 2H), 3.89 (d, *J* = 9.9 Hz, 6H). 13C NMR (101 MHz, CDCl3) δ 189.24, 188.08, 164.42, 164.25, 152.73, 148.77, 137.87, 134.11, 130.79, 130.57, 130.48, 128.46, 128.21, 127.35, 127.16, 125.94, 125.88, 125.83, 116.59, 114.22, 114.15, 114.07, 113.83, 57.68, 55.61, 55.56, 46.28. 19F NMR (376 MHz, CDCl3) δ -97.44. HRMS (ESI-Q-TOF, m/z) calcd for C28H23N3O6F2Na [M+Na]+: 558.1453 , found [M+Na]+: 558.1457.

***6-(difluoro(4-fluorophenyl)methyl)-2,4-dimethyl-1,2,4-triazine-3,5(2H,4H)-dione (3s)***

Yield: 49% ; White solid; m.p.100.2-100.9℃. 1H NMR (400 MHz, CDCl3) δ 7.66 – 7.57 (m, 2H), 7.13 (t, *J* = 8.3 Hz, 2H), 3.70 (s, 3H), 3.32 (s, 3H). 13C NMR (101 MHz, CDCl3) δ 165.80, 165.16, 162.69, 153.23, 148.89, 136.68, 136.46, 130.31, 130.06, 128.23, 118.84, 116.38, 115.61, 115.39, 40.19, 27.31. 19F NMR (376 MHz, CDCl3) δ -97.23, -109.91. HRMS (ESI-Q-TOF, m/z) calcd for C12H10N3O2F3Na [M+Na]+: 308.0623 , found [M+Na]+: 308.0619.

***6-((4-chlorophenyl)difluoromethyl)-2,4-dimethyl-1,2,4-triazine-3,5(2H,4H)-dione (3t)***

Yield: 50% ; White solid; m.p.108.6-110.0℃. 1H NMR (400 MHz, CDCl3) δ 7.57 (d, *J* = 8.3 Hz, 2H), 7.42 (d, *J* = 8.2 Hz, 2H), 3.70 (s, 3H), 3.31 (s, 3H). 13C NMR (101 MHz, CDCl3) δ 153.21, 148.84, 136.81, 136.51, 136.20, 133.06, 132.79, 132.52, 128.69, 127.50, 127.45, 127.39, 118.75, 116.30, 113.85, 40.22, 27.33. 19F NMR (376 MHz, CDCl3) δ -98.06. HRMS (ESI-Q-TOF, m/z) calcd for C12H10N3O2F2NaCl [M+Na]+: 324.0327 , found [M+Na]+: 324.0324.

***6-((4-bromophenyl)difluoromethyl)-2,4-dimethyl-1,2,4-triazine-3,5(2H,4H)-dione (3u)***

Yield: 59% ; White solid; m.p.136.1-137.5℃. 1H NMR (400 MHz, CDCl3) δ 7.58 (d, *J* = 8.0 Hz, 2H), 7.50 (d, *J* = 8.4 Hz, 2H), 3.70 (s, 3H), 3.31 (s, 3H). 13C NMR (101 MHz, CDCl3) δ 153.20, 148.82, 136.73, 136.43, 136.13, 133.57, 133.30, 133.03, 131.65, 127.72, 127.67, 127.61, 125.13, 118.80, 116.35, 113.91, 40.22, 27.33. 19F NMR (376 MHz, CDCl3) δ -98.26. HRMS (ESI-Q-TOF, m/z) calcd for C12H10N3O2F2NaBr [M+Na]+: 367.9822 , found [M+Na]+: 367.9826.

***6-(difluoro(4-(trifluoromethyl)phenyl)methyl)-2,4-dimethyl-1,2,4-triazine-3,5(2H,4H)-dione (3v)***

Yield: 43% ; White solid; m.p.120.6-121.8℃. 1H NMR (400 MHz, CDCl3) δ 7.74 (dd, *J* = 22.0, 8.0 Hz, 4H), 3.70 (s, 3H), 3.32 (s, 3H). 13C NMR (101 MHz, CDCl3) δ 153.19, 148.78, 137.89, 136.20, 132.46, 126.64, 126.58, 126.52, 125.47, 125.44, 124.99, 122.30, 116.07, 113.63, 40.26, 40.26, 27.35, 27.35. 19F NMR (376 MHz, CDCl3) δ -62.97, -98.75. HRMS (ESI-Q-TOF, m/z) calcd for C13H10N3O2F5Na [M+Na]+: 358.0591 , found [M+Na]+: 358.0592.

***6-(difluoro(3-methoxyphenyl)methyl)-2,4-dimethyl-1,2,4-triazine-3,5(2H,4H)-dione (3w)***

Yield: 88% ; White solid; m.p.100.1-101.2℃. 1H NMR (400 MHz, CDCl3) δ 7.35 (t, *J* = 7.9 Hz, 1H), 7.21 – 7.13 (m, 2H), 6.99 (d, *J* = 7.7 Hz, 1H), 3.84 (s, 3H), 3.70 (s, 3H), 3.31 (s, 3H). 13C NMR (101 MHz, CDCl3) δ 159.50, 153.21, 148.92, 137.16, 136.85, 136.48, 135.94, 135.68, 135.41, 129.57, 118.89, 118.13, 118.07, 118.01, 116.42, 116.16, 113.98, 111.43, 55.42, 40.17, 27.30. 19F NMR (376 MHz, CDCl3) δ -97.87. HRMS (ESI-Q-TOF, m/z) calcd for C13H13N3O3F2Na [M+Na]+: 320.0823 , found [M+Na]+: 320.0820.

***6-(1,1-difluoroethyl)-2,4-dimethyl-1,2,4-triazine-3,5(2H,4H)-dione(3x)***

Yield: 68% ; White solid; m.p.101.3-102.2℃. 1H NMR (400 MHz, Chloroform-*d*) δ 3.69 (s, 3H), 3.37 (s, 3H), 1.98 (t, *J* = 18.7 Hz, 3H). 13C NMR (101 MHz, CDCl3) δ 153.43, 148.92, 136.85, 136.56, 136.26, 120.94, 118.56, 116.17, 40.05, 27.33, 22.64, 22.38, 22.12. 19F NMR (377 MHz, CDCl3) δ -93.05. HRMS (ESI-Q-TOF, m/z) calcd for C7H9N3O2F2Na [M+Na]+: 228.0561 , found [M+Na]+: 228.0559.


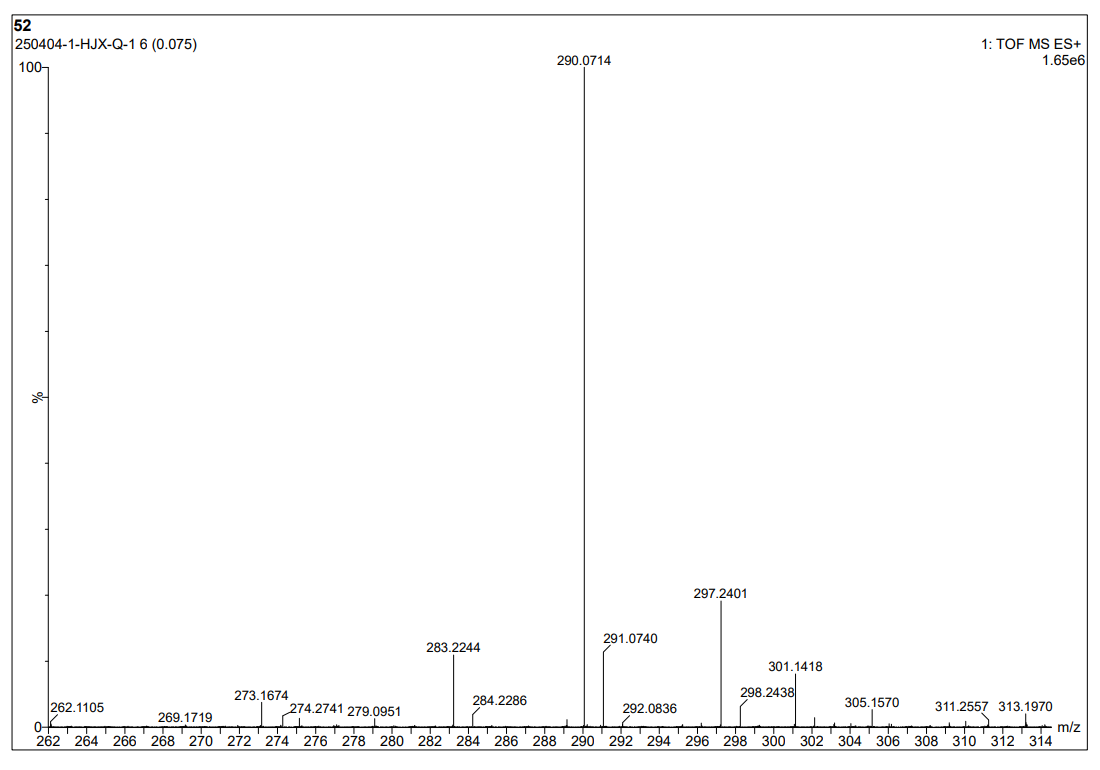


图S1 1-1 HR Mass spectrum (ESI) of compound **3a**


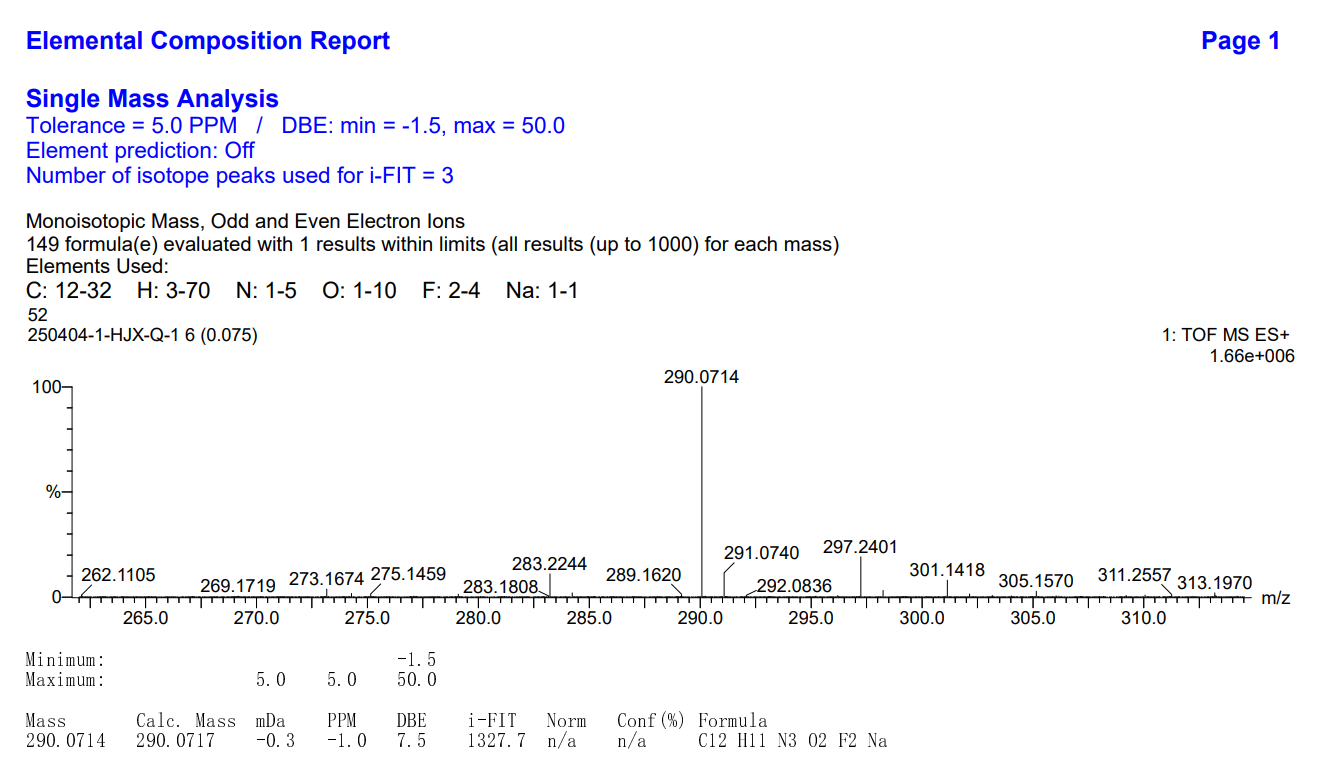


图S1 1-2 HR Mass spectrum (ESI) of compound **3a**


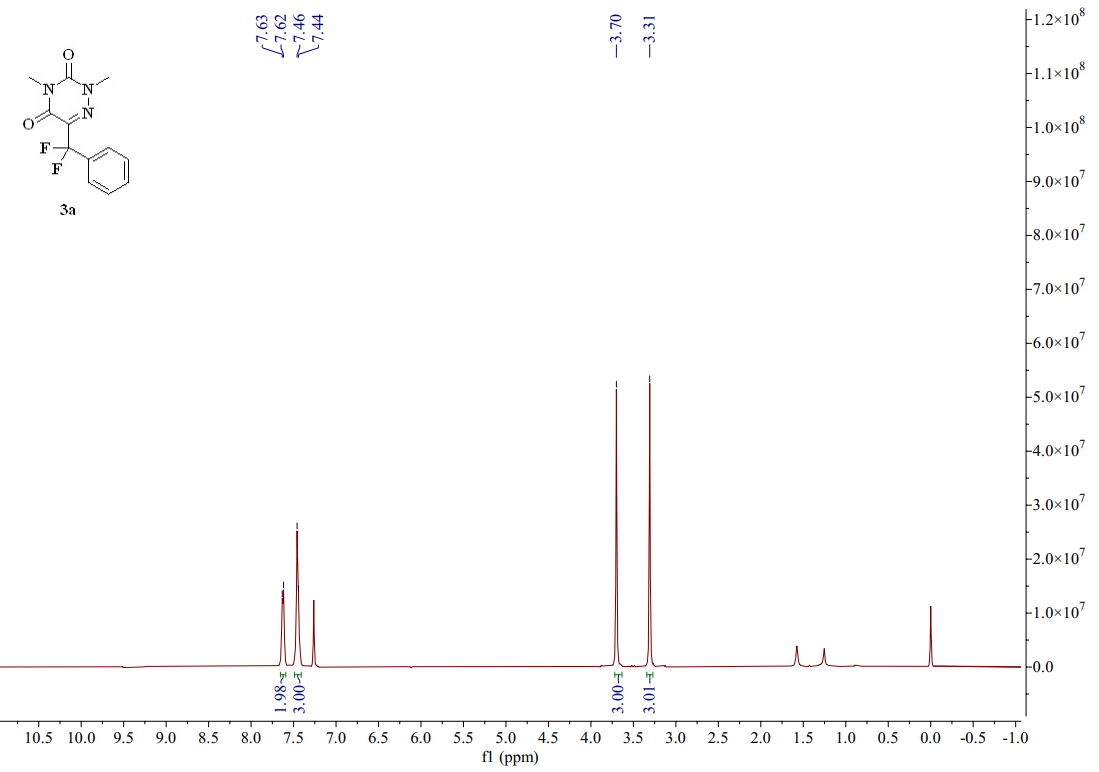


图S1 1-3  1H-NMR spectrum (CDCl3, 400 MHZ) of compound **3a**


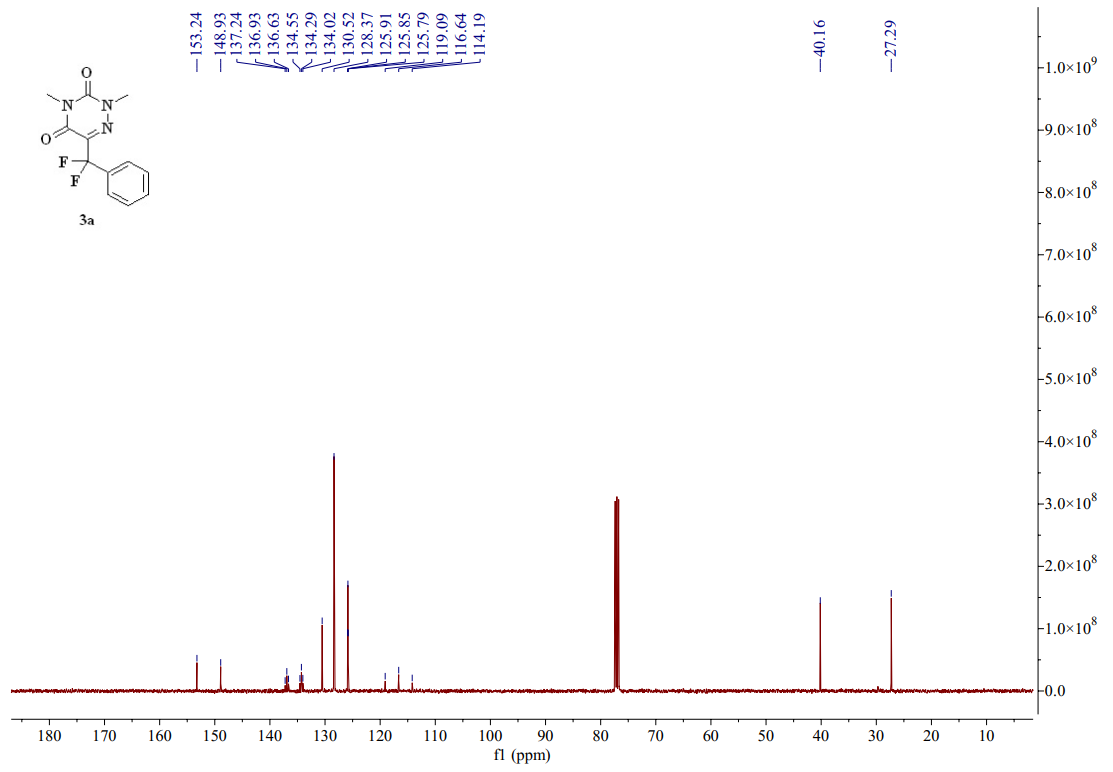


图 S1 1-4 13C-NMR spectrum (CDCl3, 101 MHZ) of compound **3a**


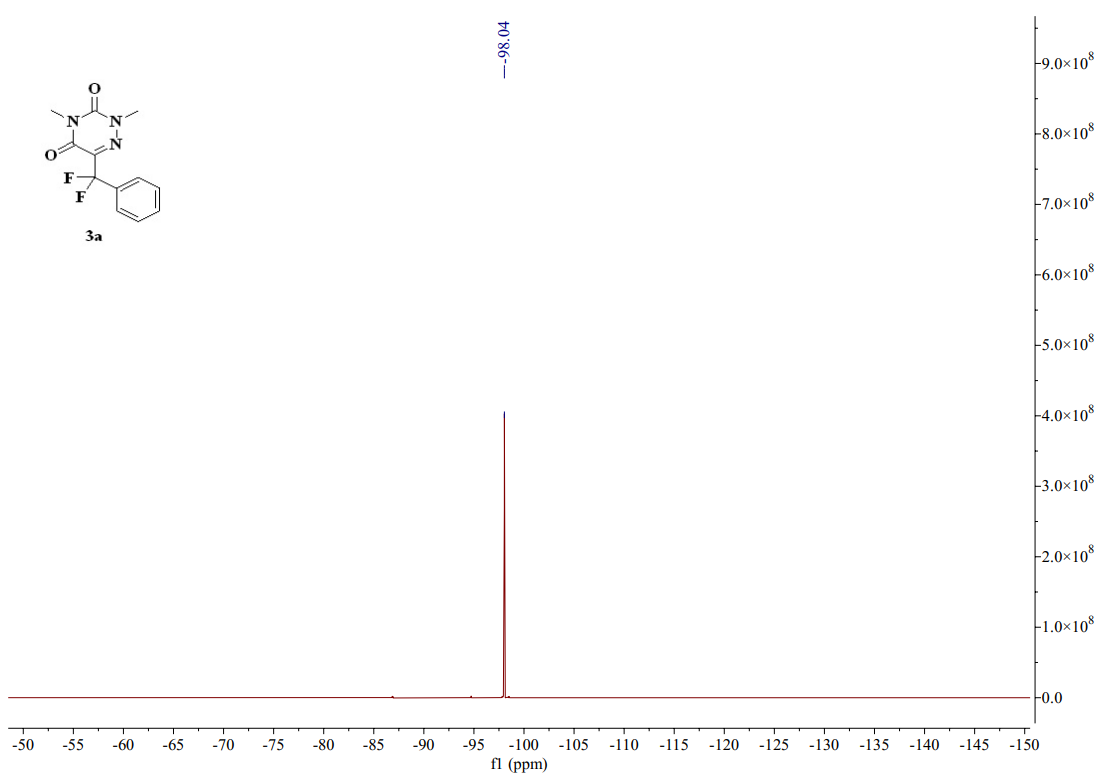


图S1 1-5  19F-NMR spectrum (CDCl3, 376 MHZ) of compound **3a**


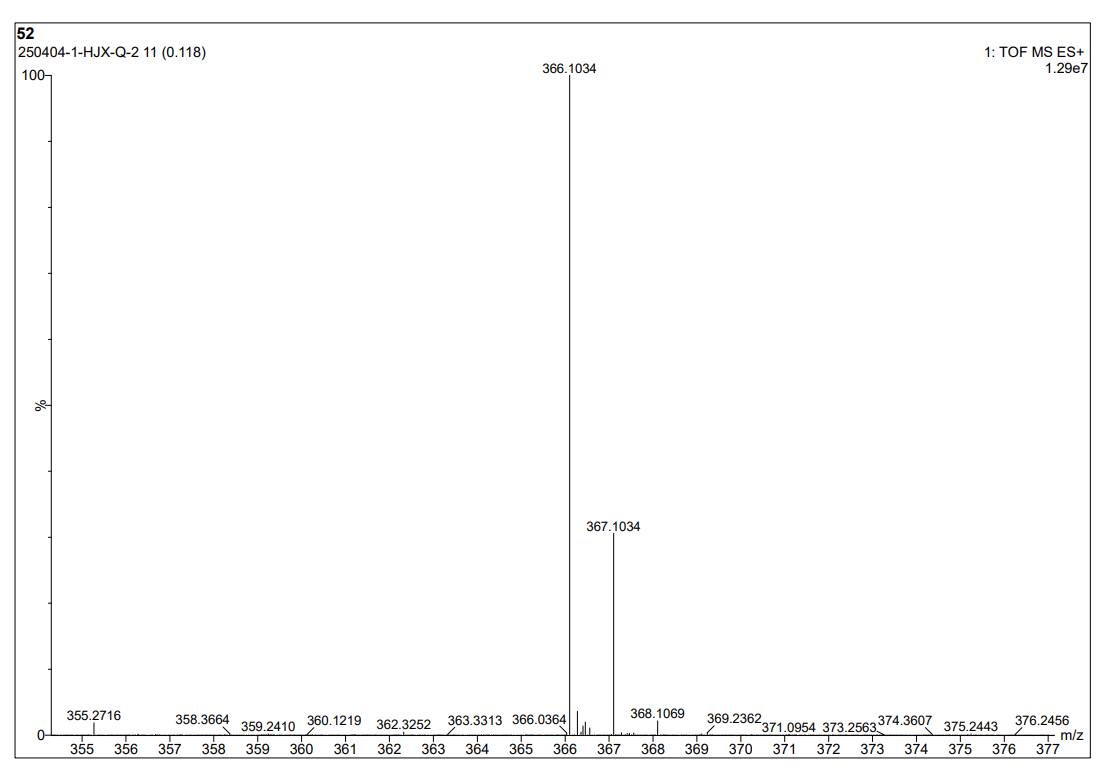


图S1 2-1 HR Mass spectrum (ESI) of compound **3b**


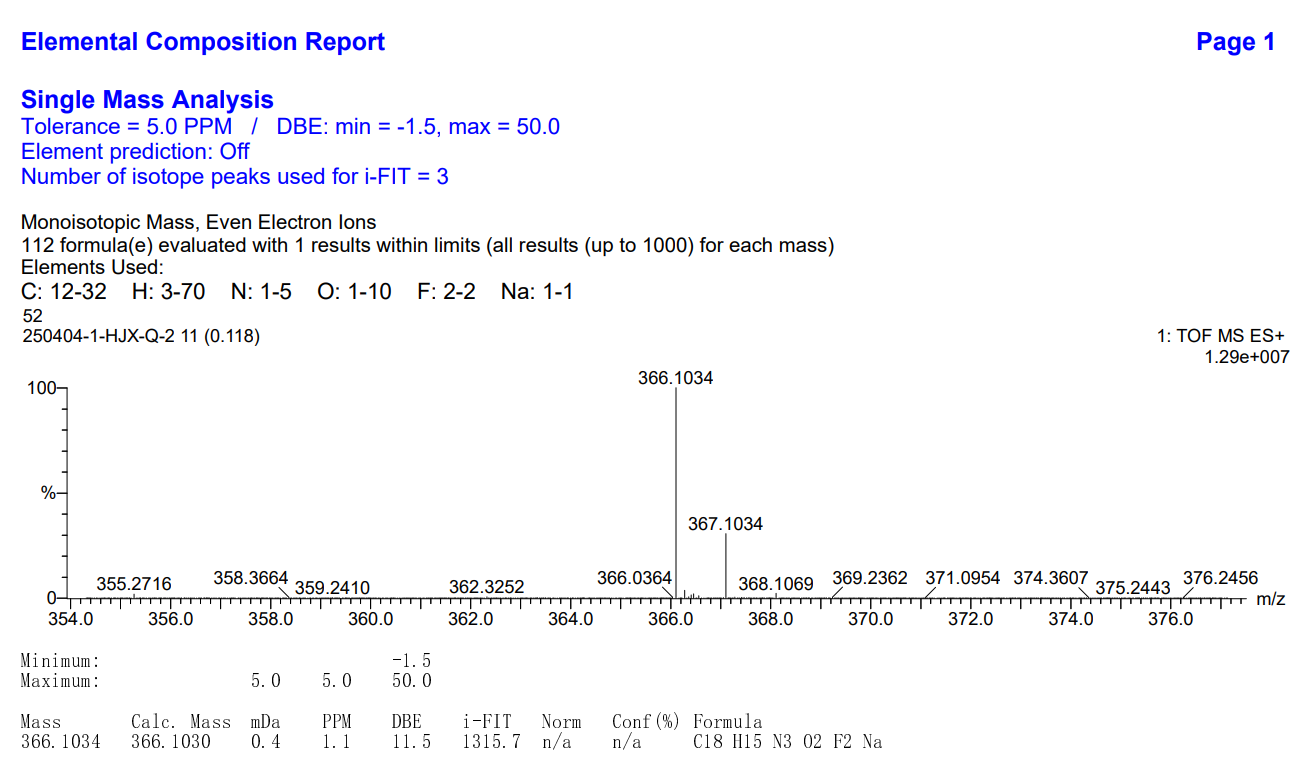


图S1 2-2 HR Mass spectrum (ESI) of compound **3b**


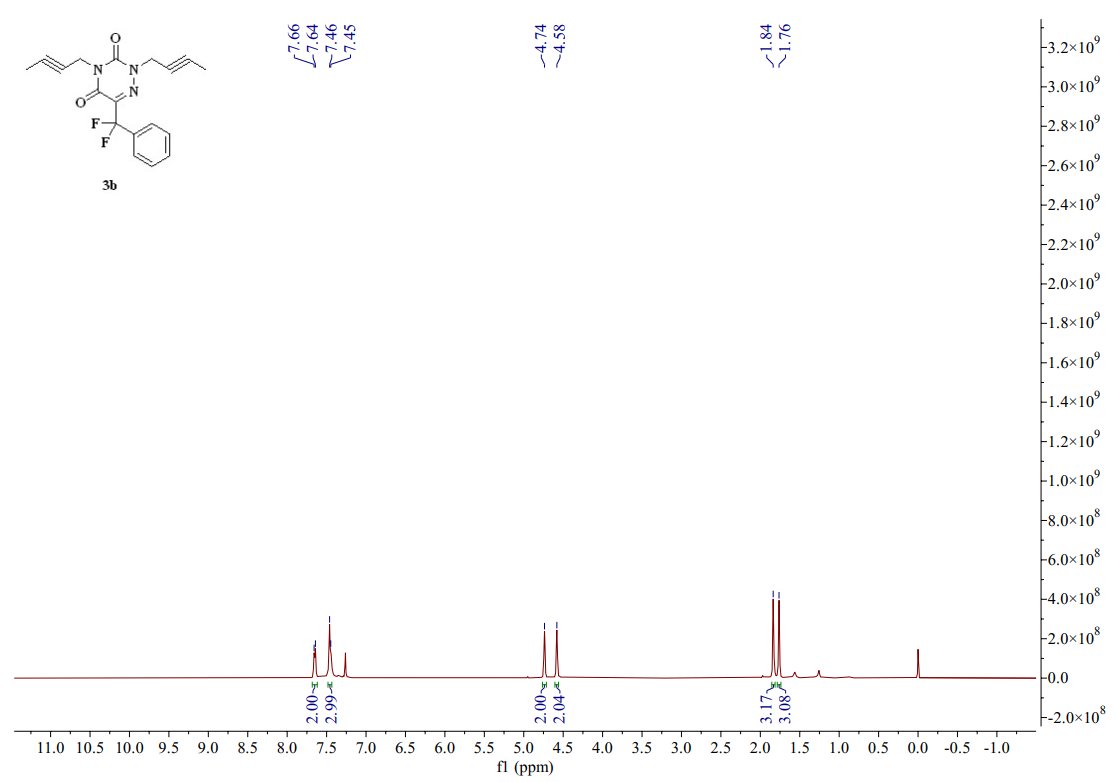


图S1 2-3  1H-NMR spectrum (CDCl3, 400 MHZ) of compound **3b**


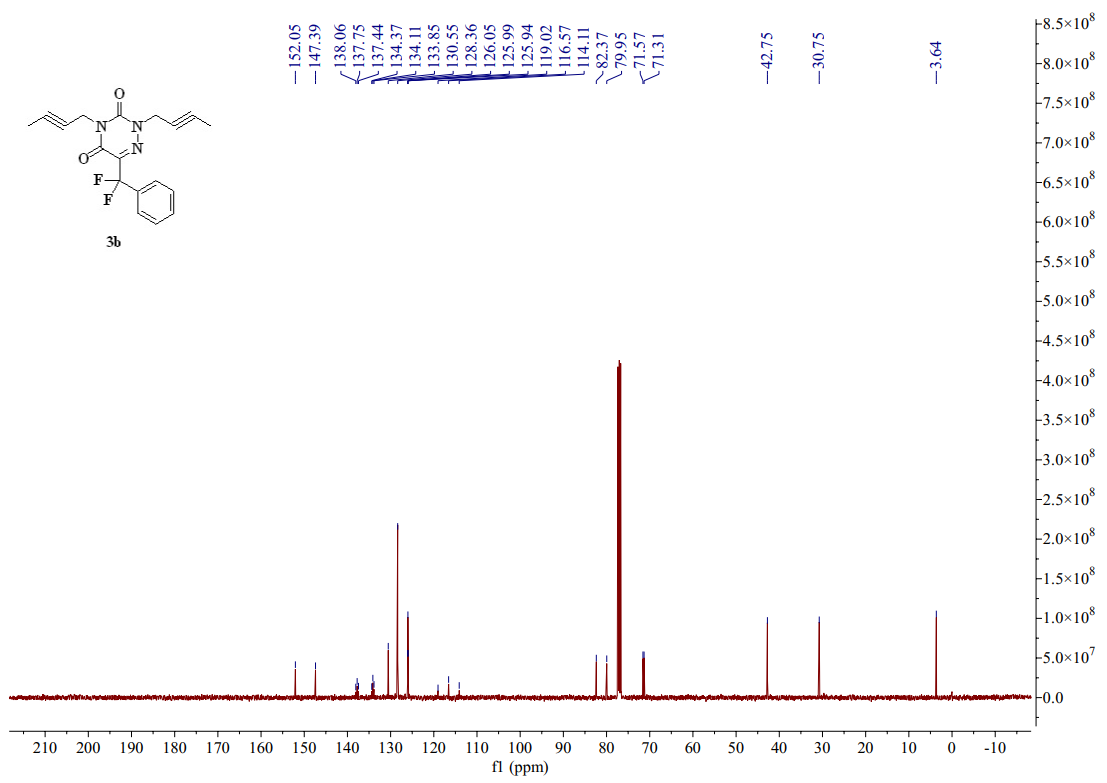


图S1 2-4  13C-NMR spectrum (CDCl3, 101 MHZ) of compound **3b**


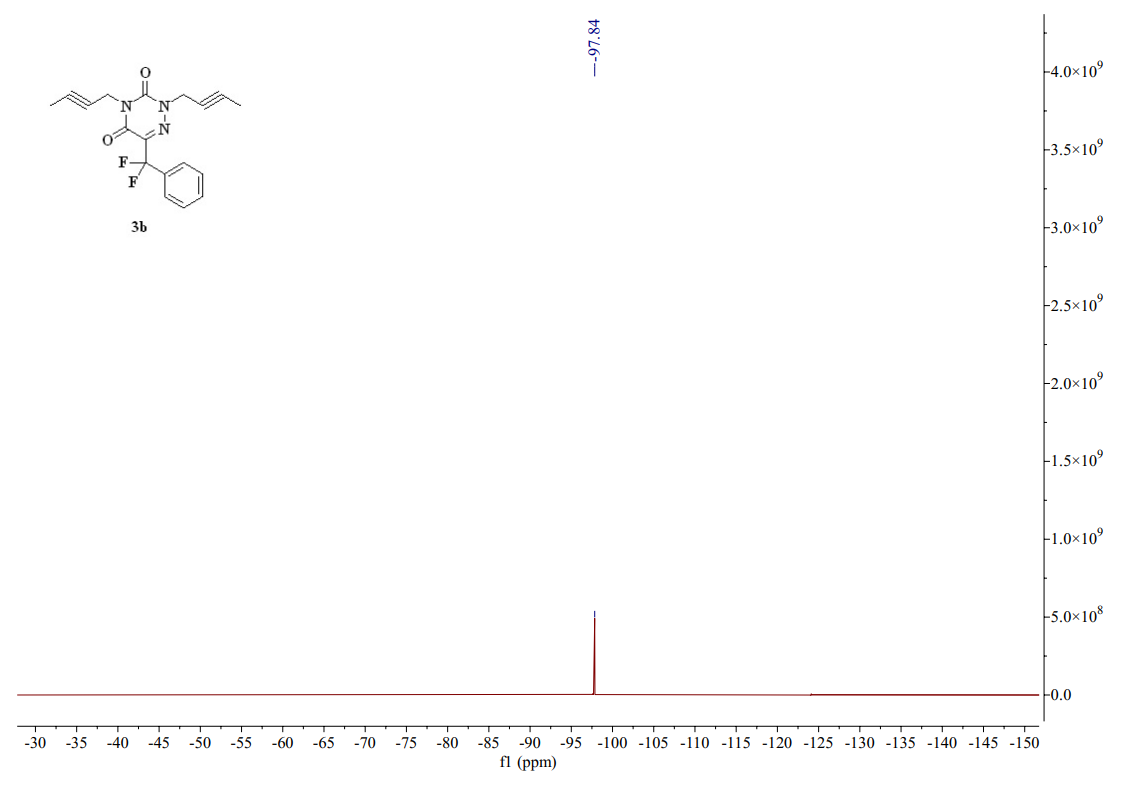


图S1 2-5  19F-NMR spectrum (CDCl3, 376 MHZ) of compound **3b**


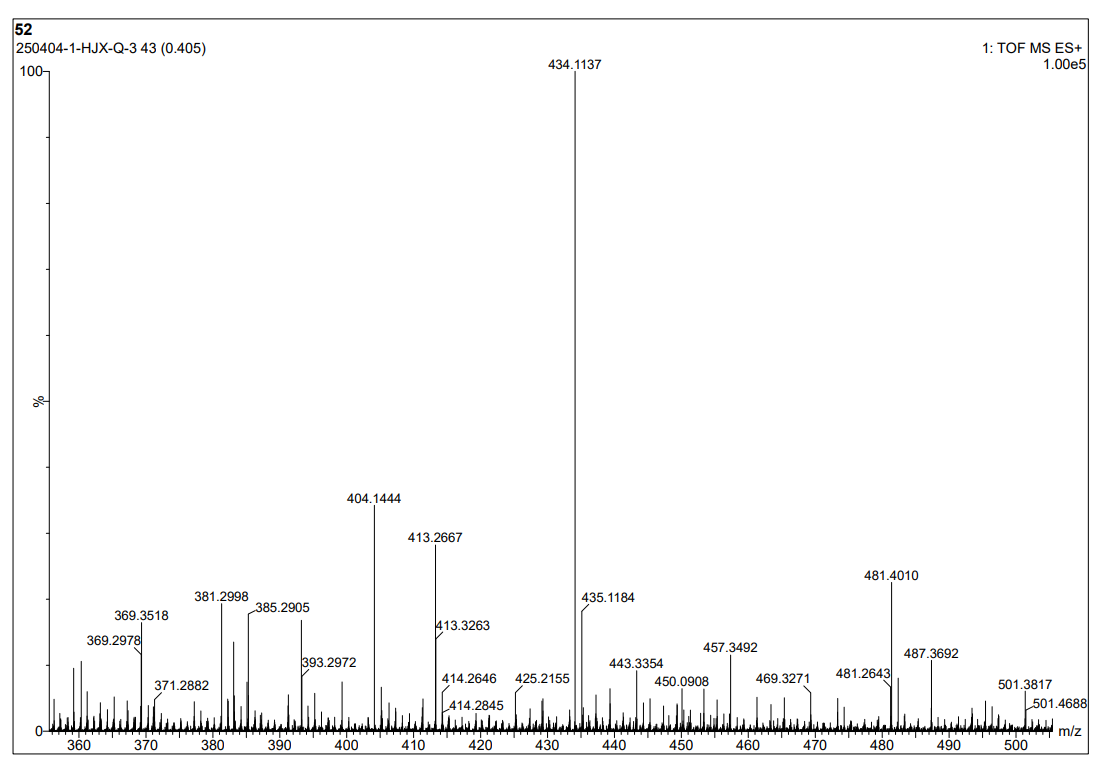


图S1 3-1 HR Mass spectrum (ESI) of compound **3c**


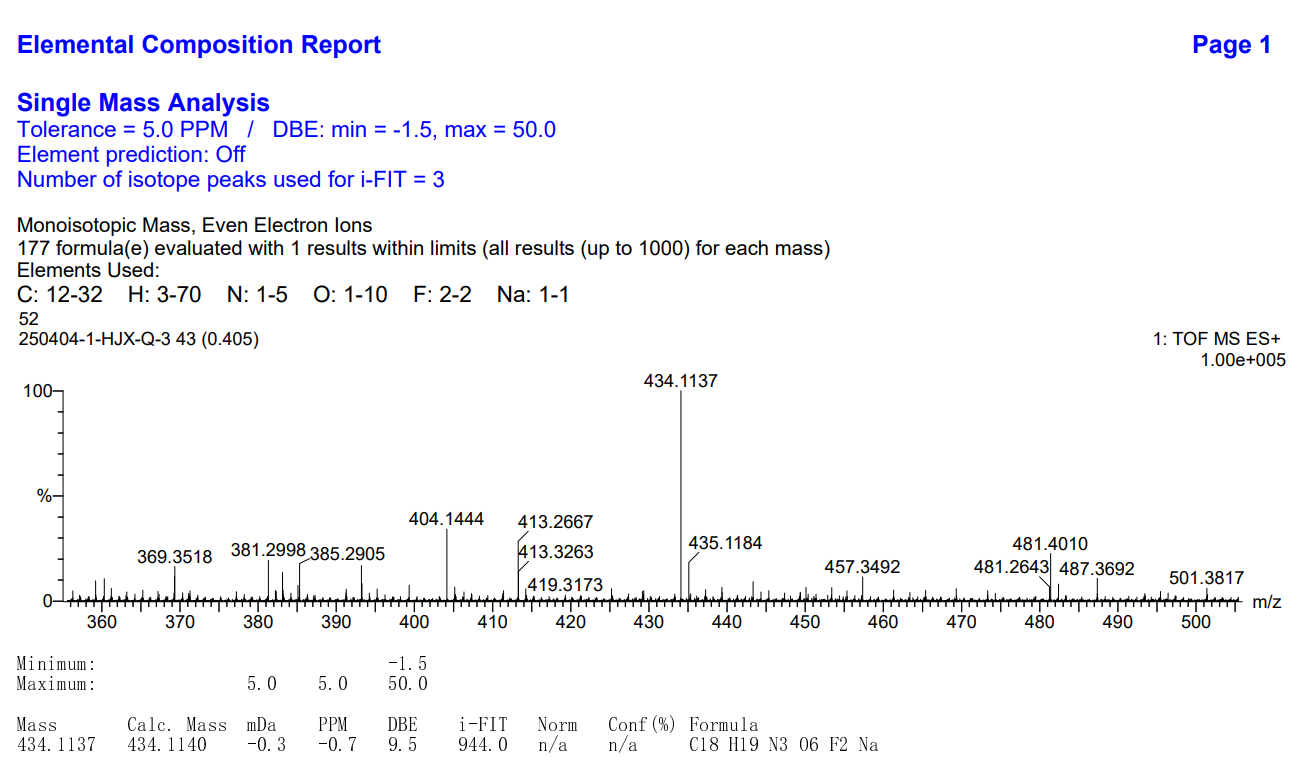


图S1 3-2 HR Mass spectrum (ESI) of compo und **3c**


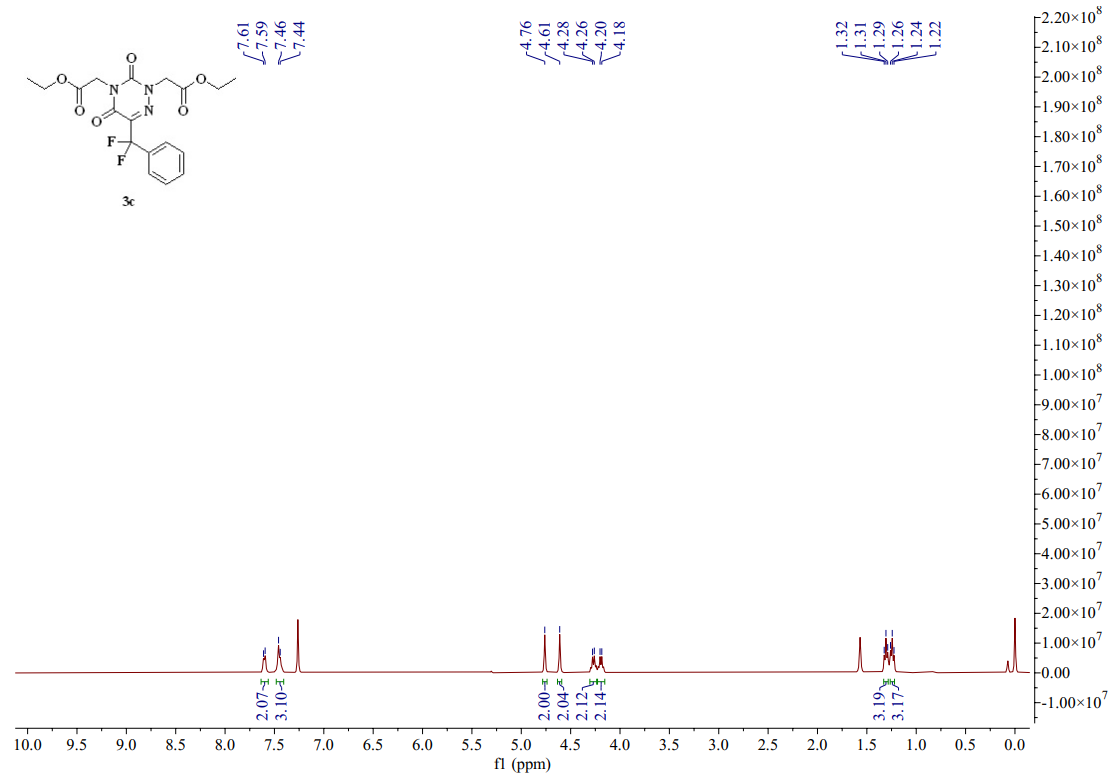


图S1 3-3  1H-NMR spectrum (CDCl3, 400 MHZ) of compound **3c**


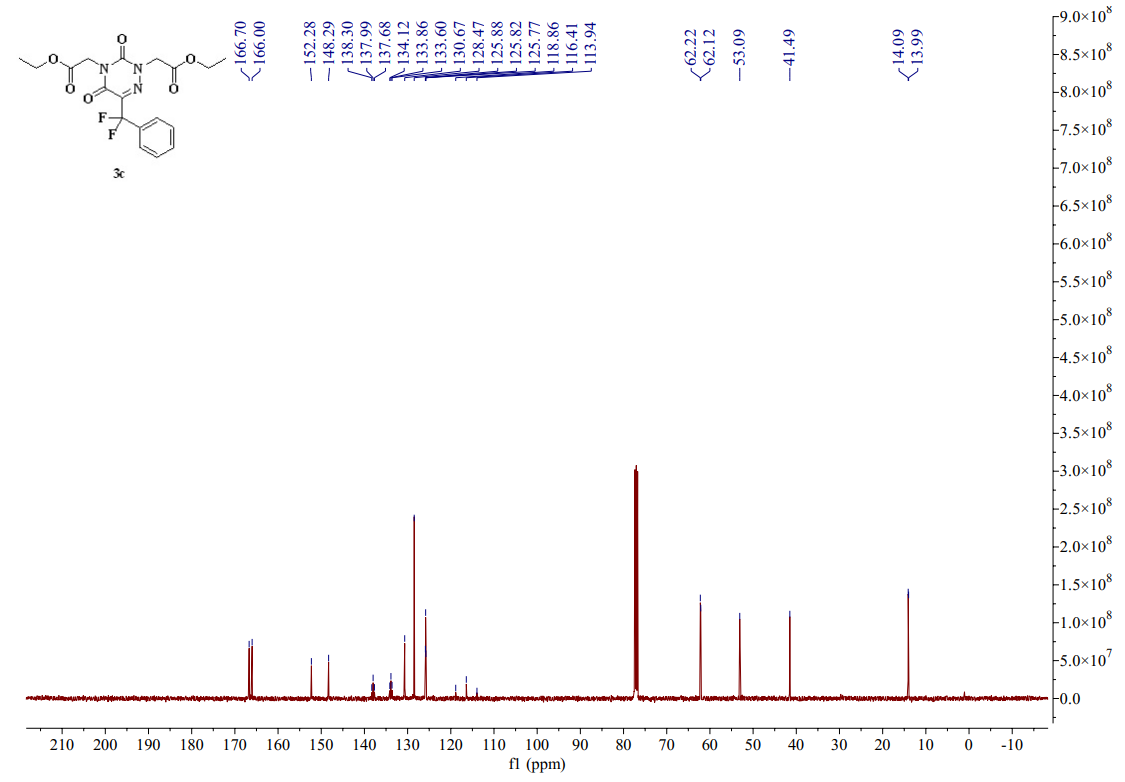


图S1 3-4  13C-NMR spectrum (CDCl3, 101 MHZ) of compound **3c**


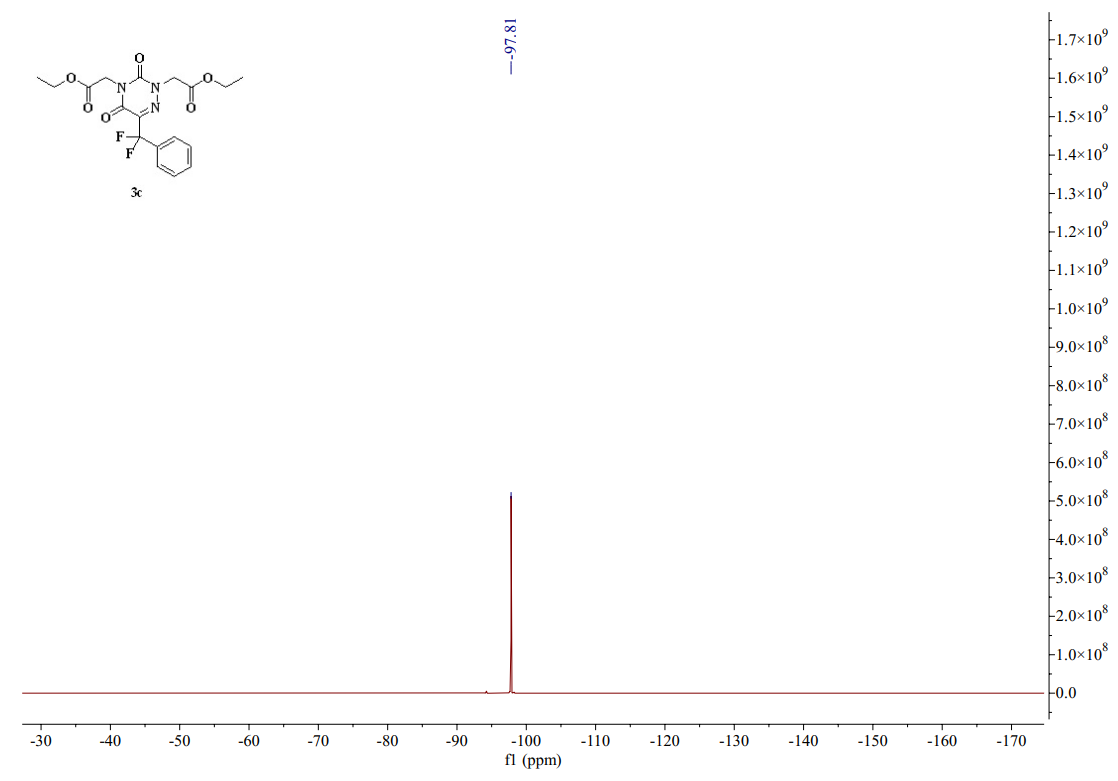


图S1 3-5  19F-NMR spectrum (CDCl3, 376 MHZ) of compound **3c**


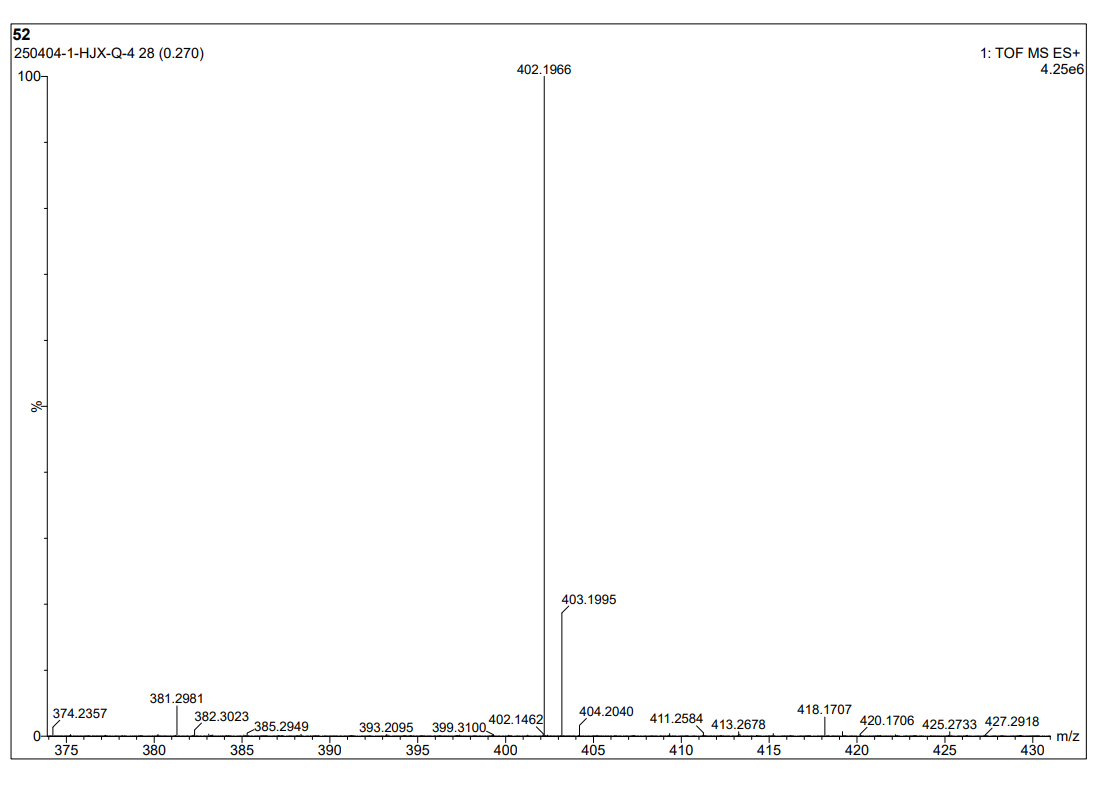


图S1 4-1 HR Mass spectrum (ESI) of compound **3d**


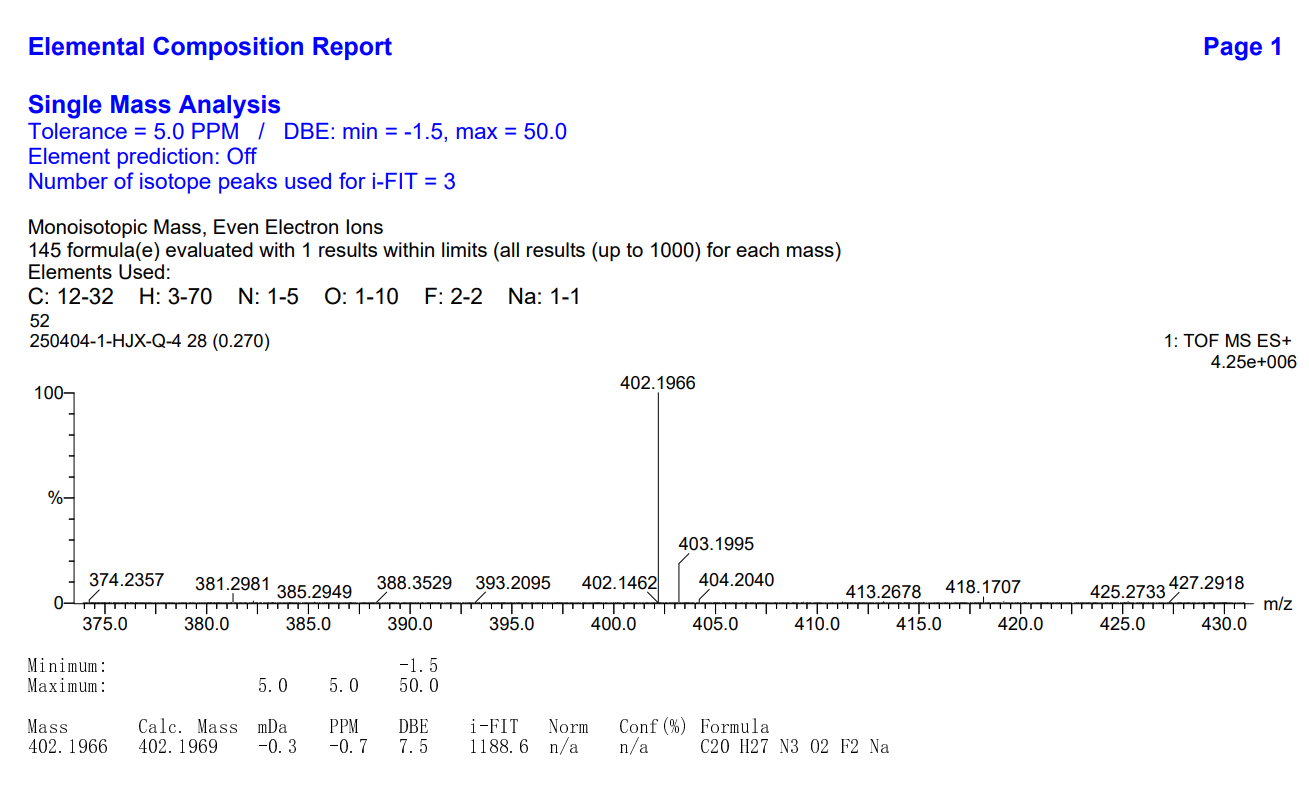


图S1 4-2 HR Mass spectrum (ESI) of compound **3d**


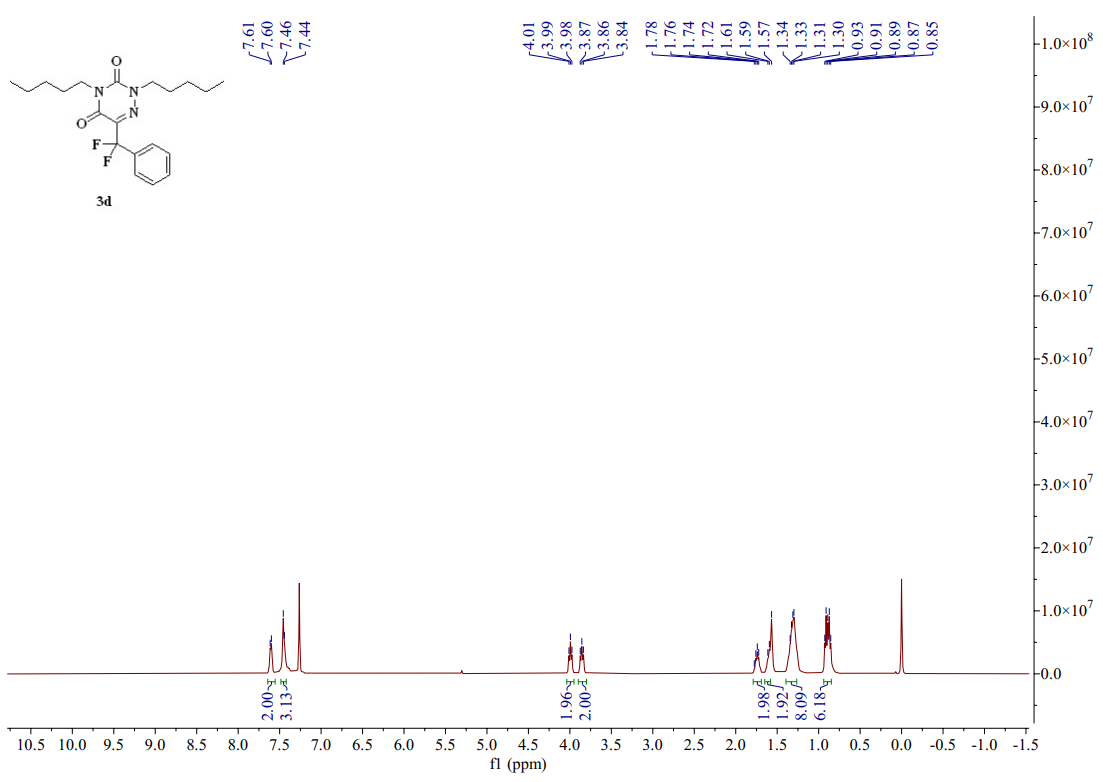


图S1 4-3  1H-NMR spectrum (CDCl3, 400 MHZ) of compound **3d**


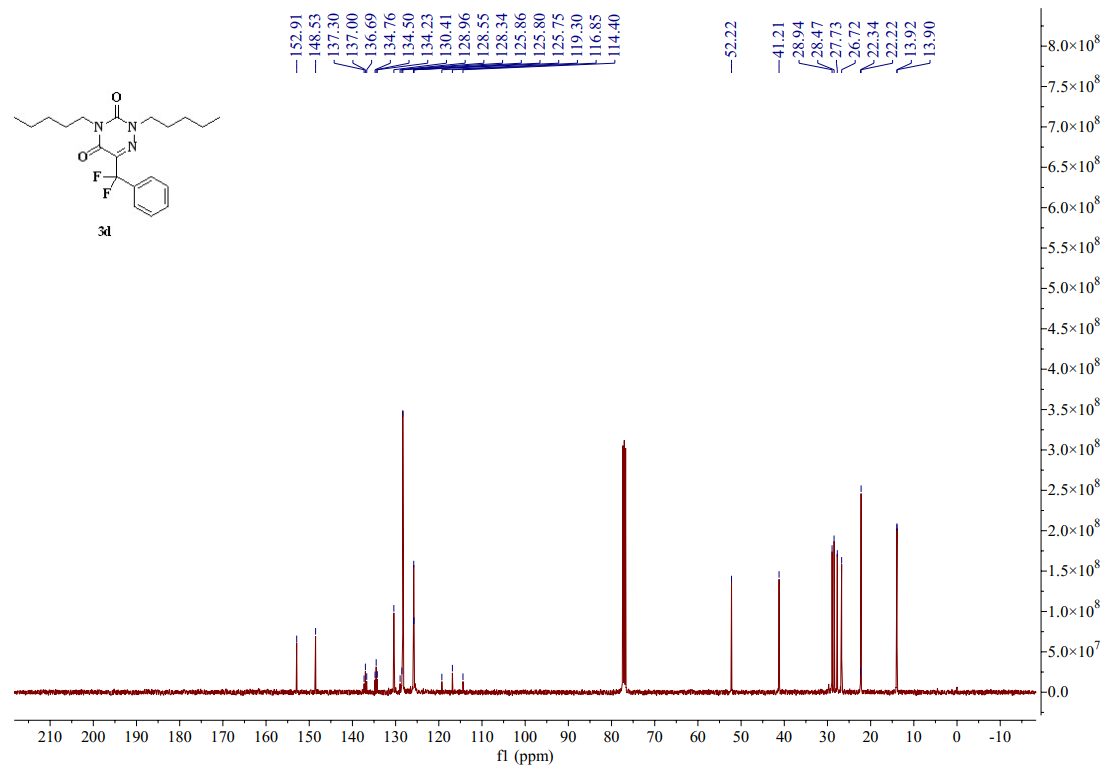


图S1 4-4  13C-NMR spectrum (CDCl3, 101 MHZ) of compound **3d**


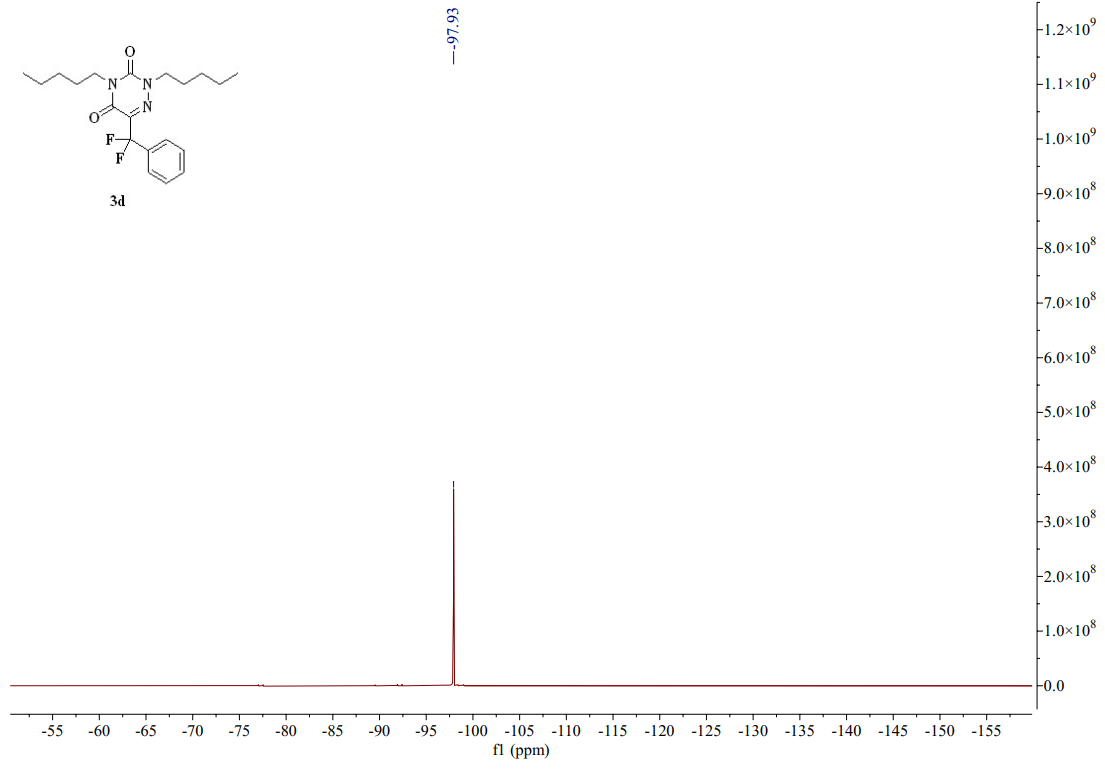


图S1 4-5  19F-NMR spectrum (CDCl3, 376 MHZ) of compound **3d**


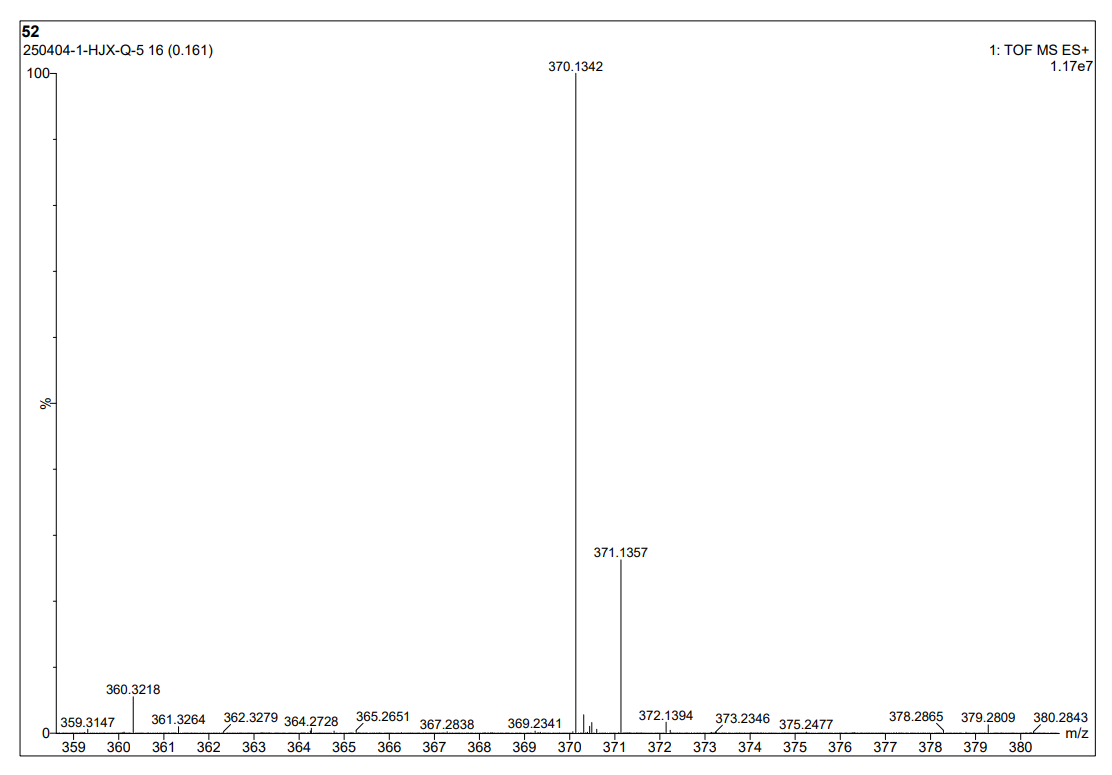


图S1 5-1 HR Mass spectrum (ESI) of compound **3e**


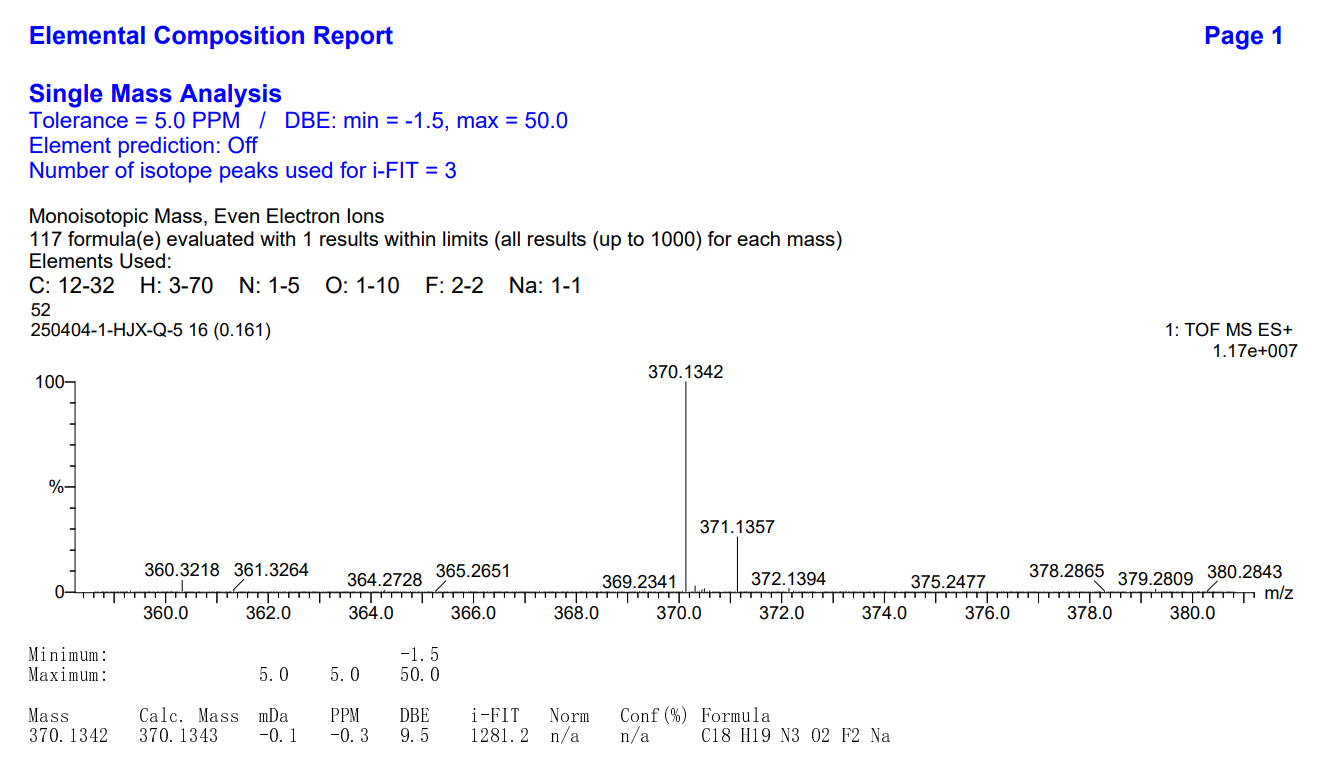


图S1 5-2 HR Mass spectrum (ESI) of compound **3e**


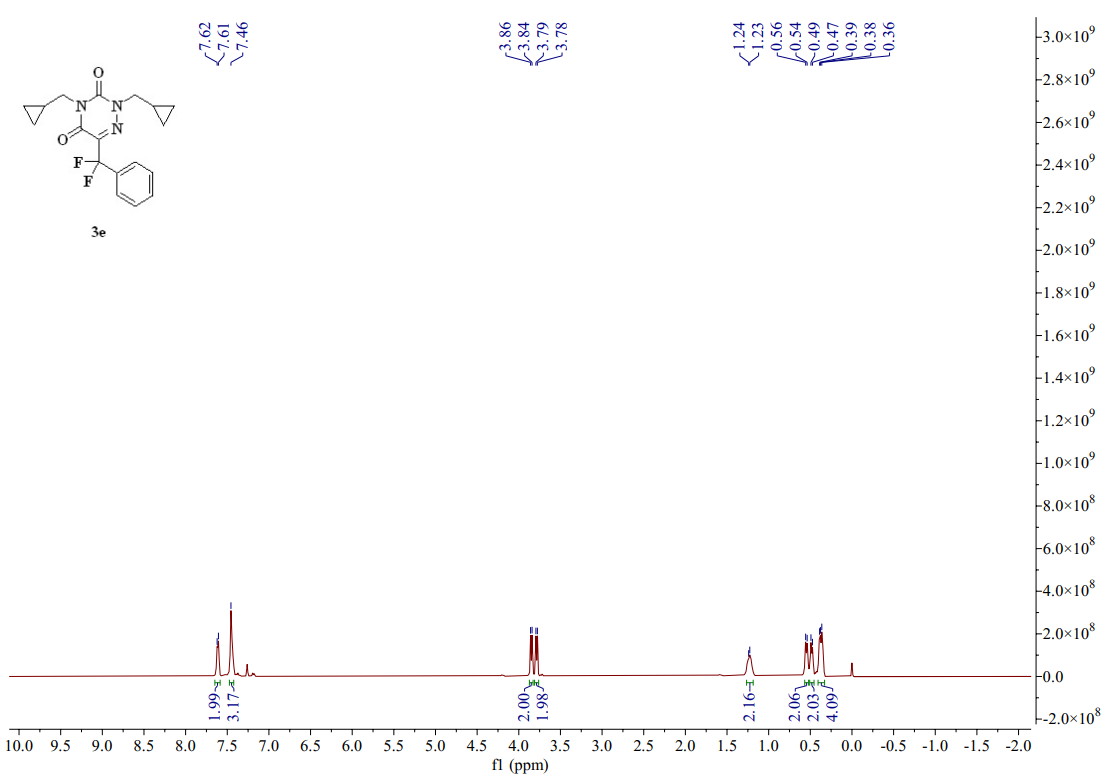


图S1 5-3  1H-NMR spectrum (CDCl3, 400 MHZ) of compound **3e**


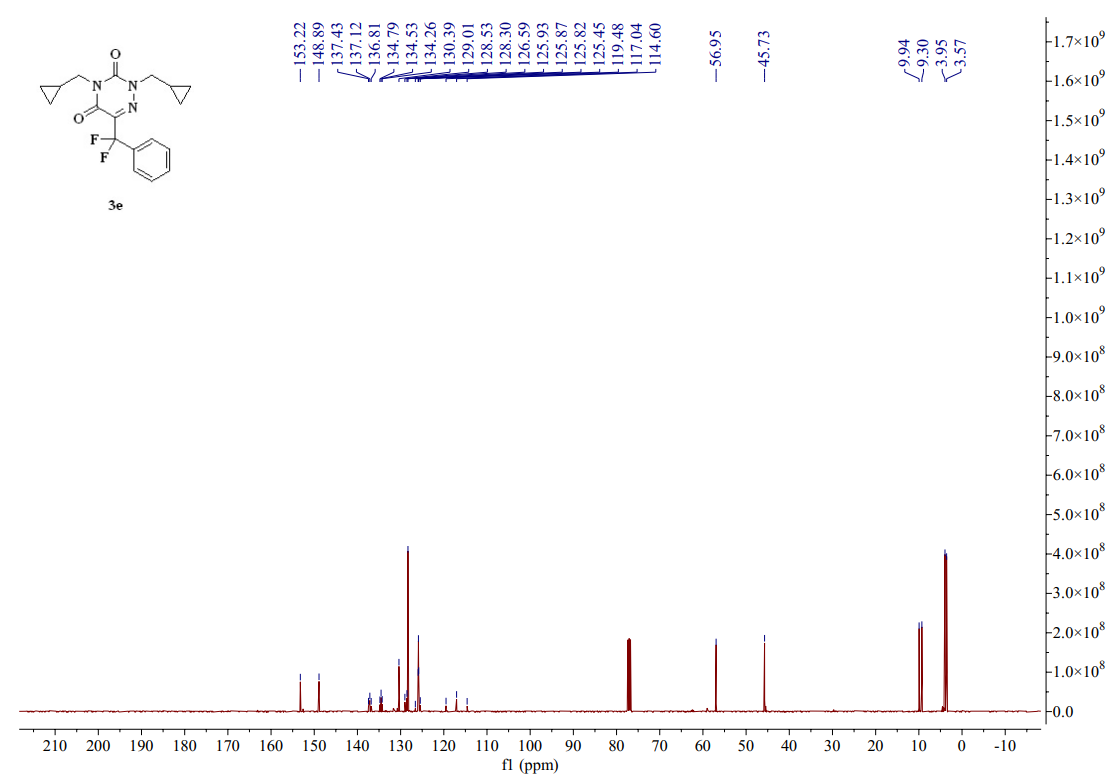


图S1 5-4  13C-NMR spectrum (CDCl3, 101 MHZ) of compound **3e**


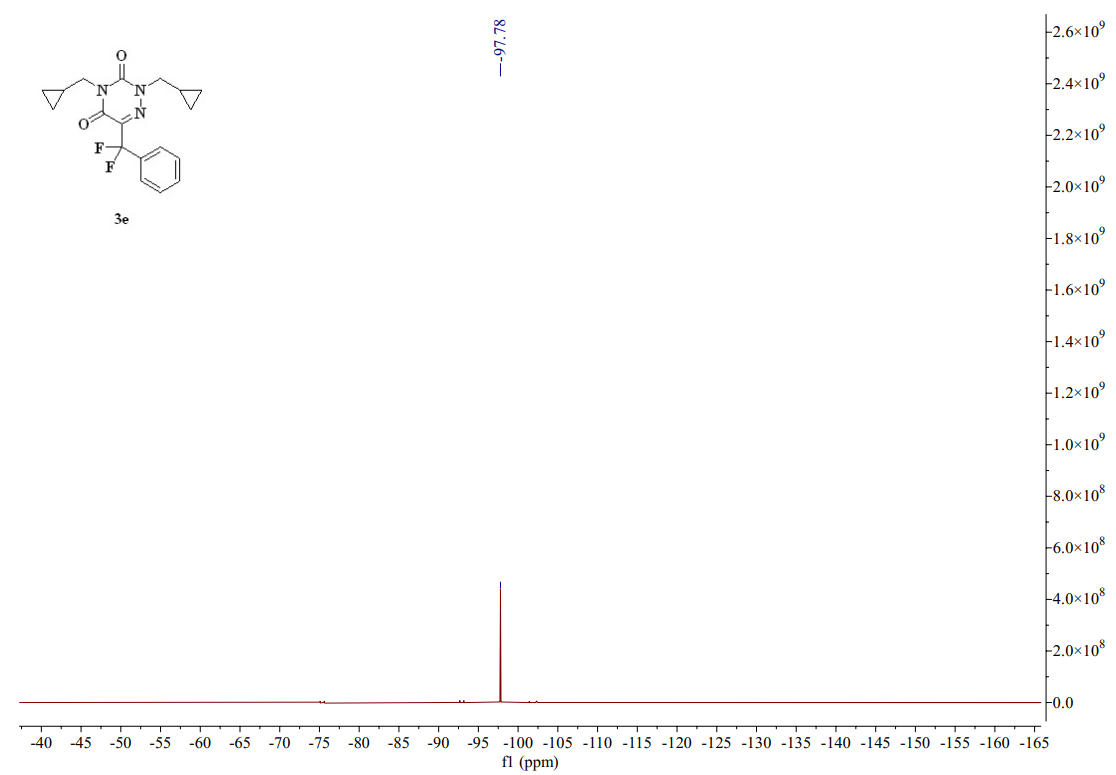


图S1 5-5  19F-NMR spectrum (CDCl3, 376 MHZ) of compound **3e**


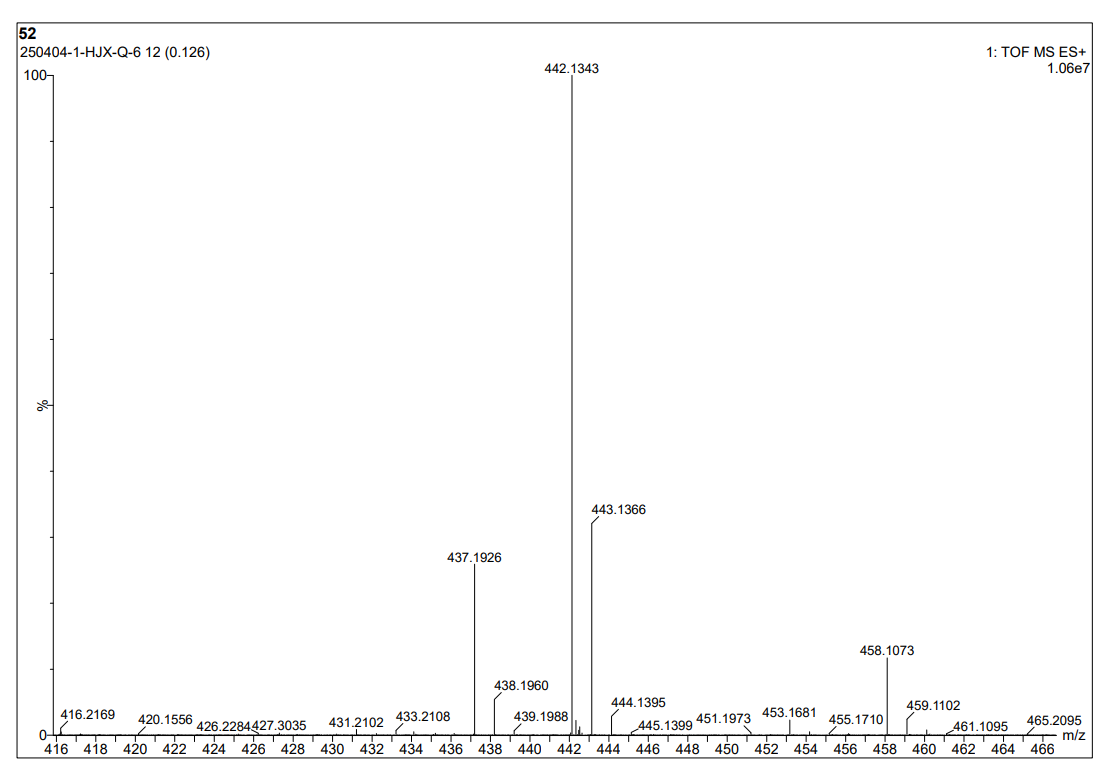


图S1 6-1 HR Mass spectrum (ESI) of compound **3f**


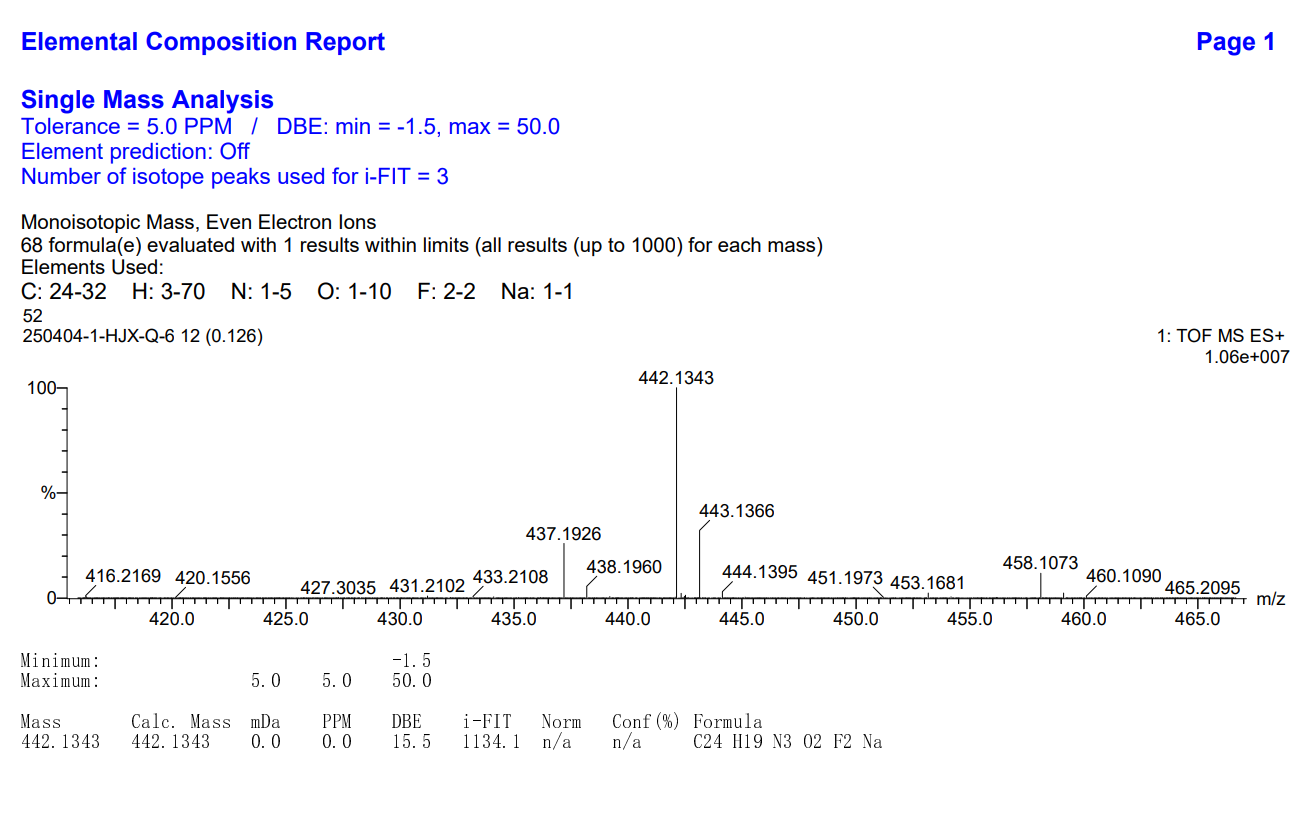


图S1 6-2 HR Mass spectrum (ESI) of compound **3f**


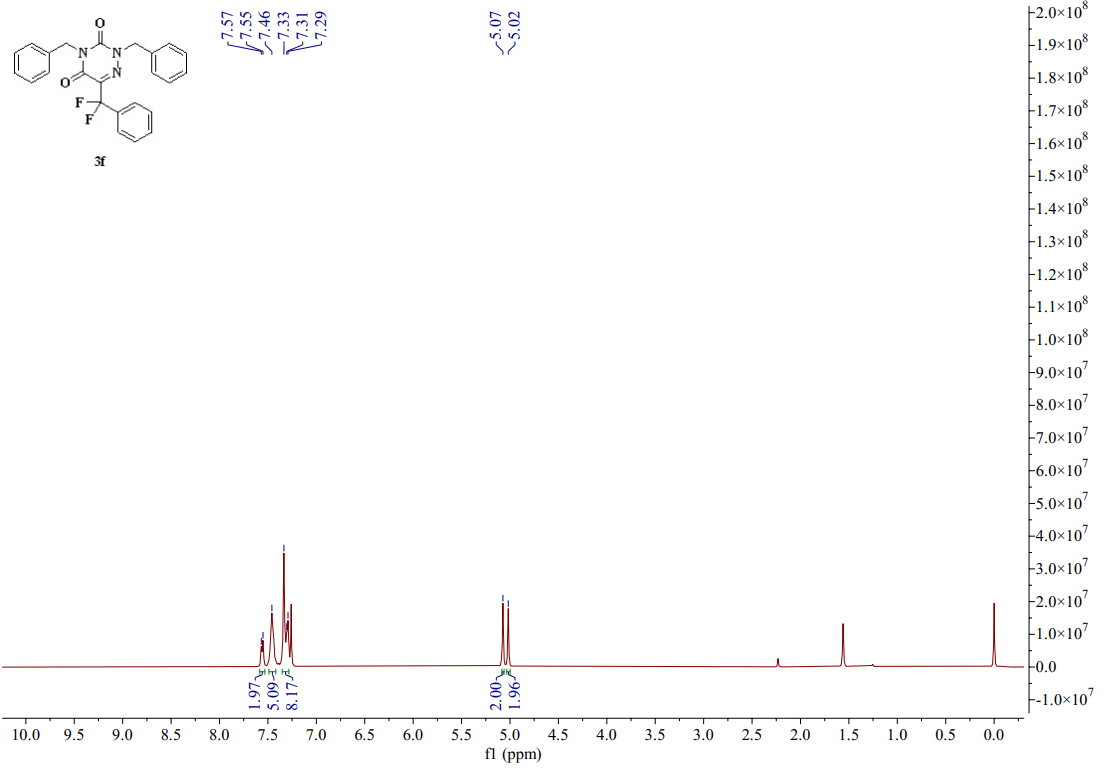


图S1 6-3  1H-NMR spectrum (CDCl3, 400 MHZ) of compound **3f**


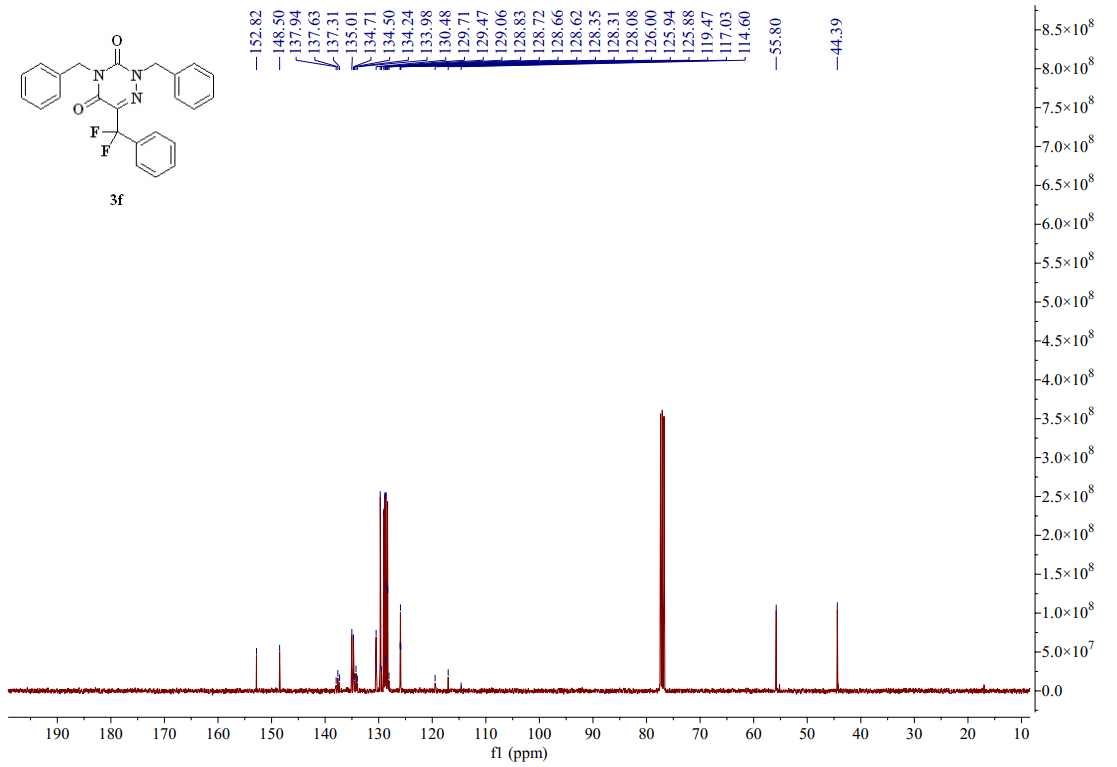


图S1 6-4  13C-NMR spectrum (CDCl3, 101 MHZ) of compound **3f**


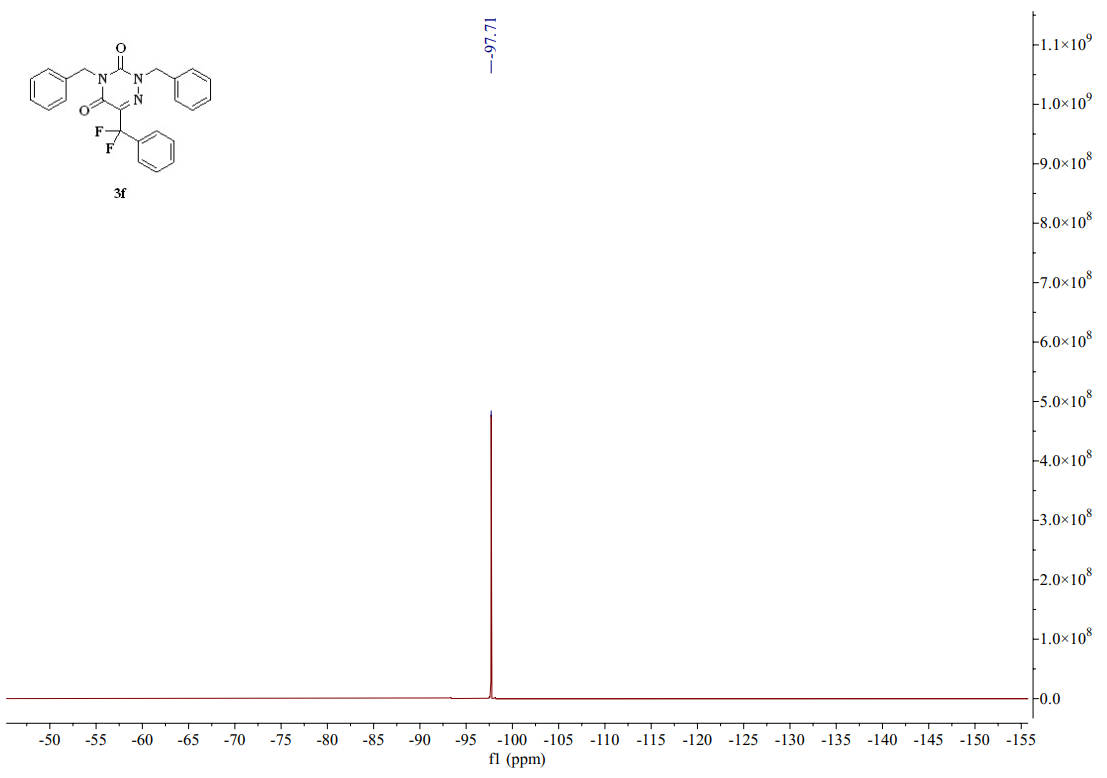


图S1 6-5  19F-NMR spectrum (CDCl3, 376 MHZ) of compound **3f**


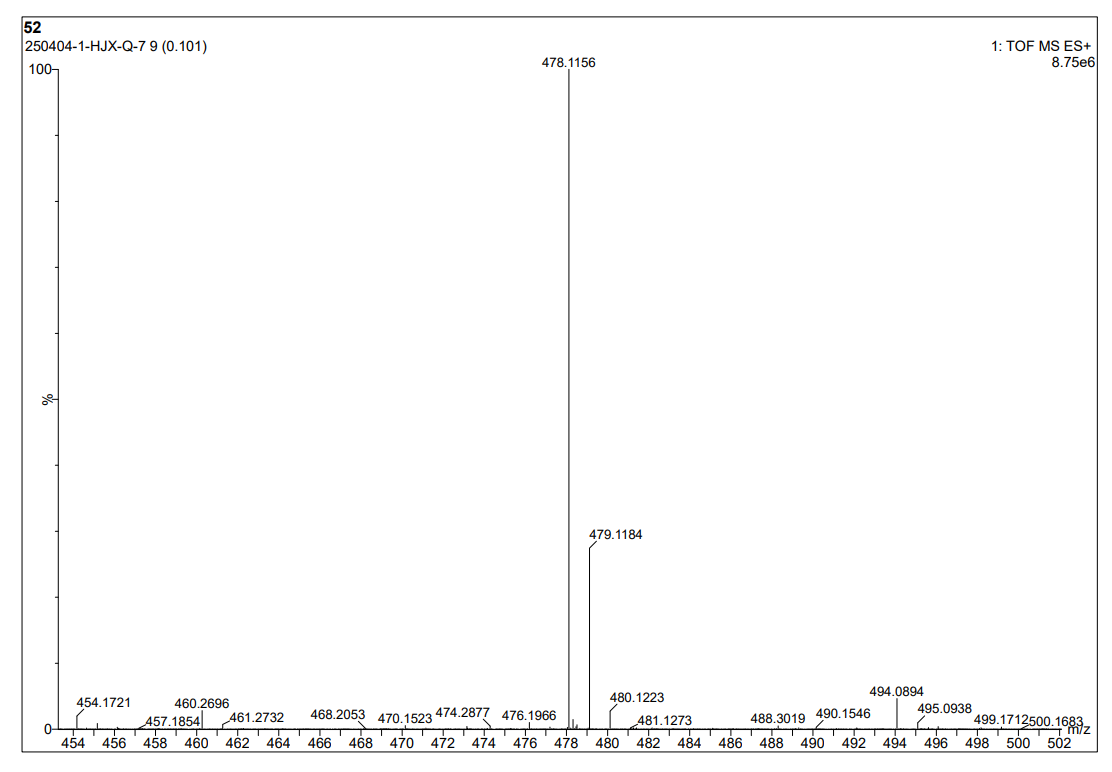


图S1 7-1 HR Mass spectrum (ESI) of compound **3g**


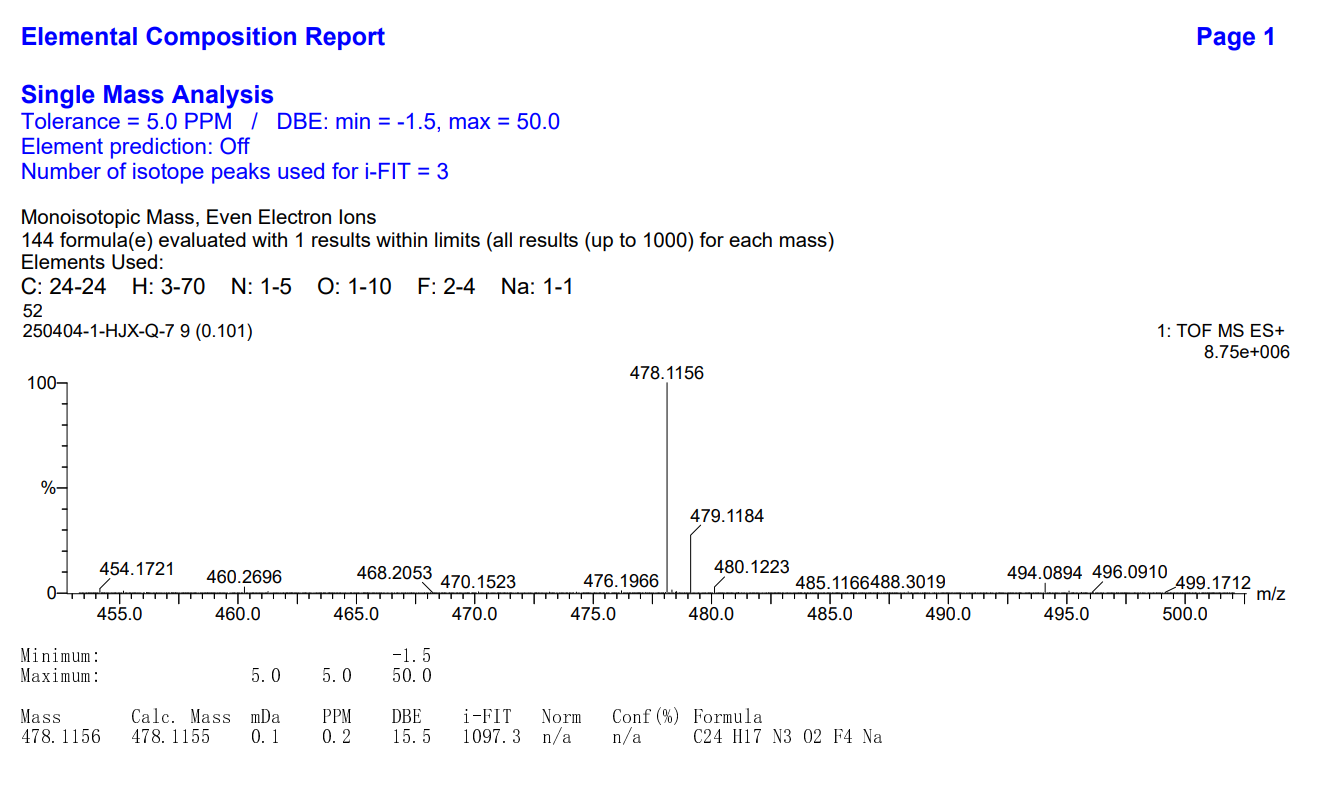


图S1 7-2 HR Mass spectrum (ESI) of compound **3g**


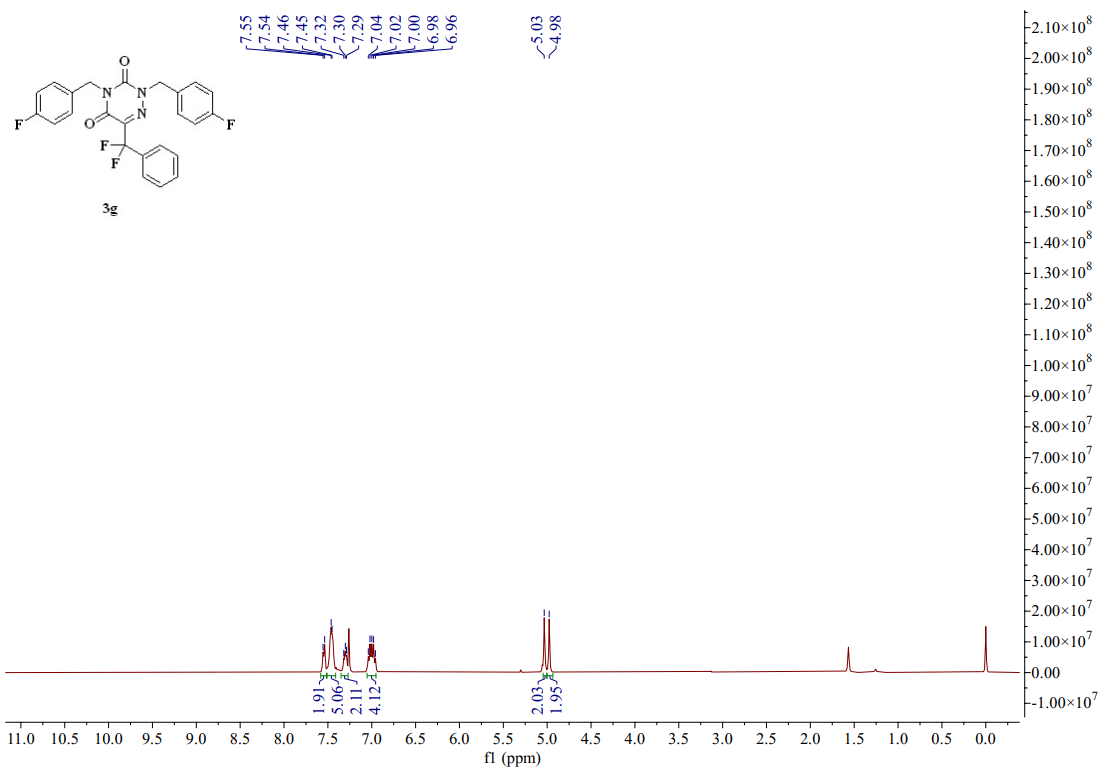


图S1 7-3  1H-NMR spectrum (CDCl3, 400 MHZ) of compound **3g**


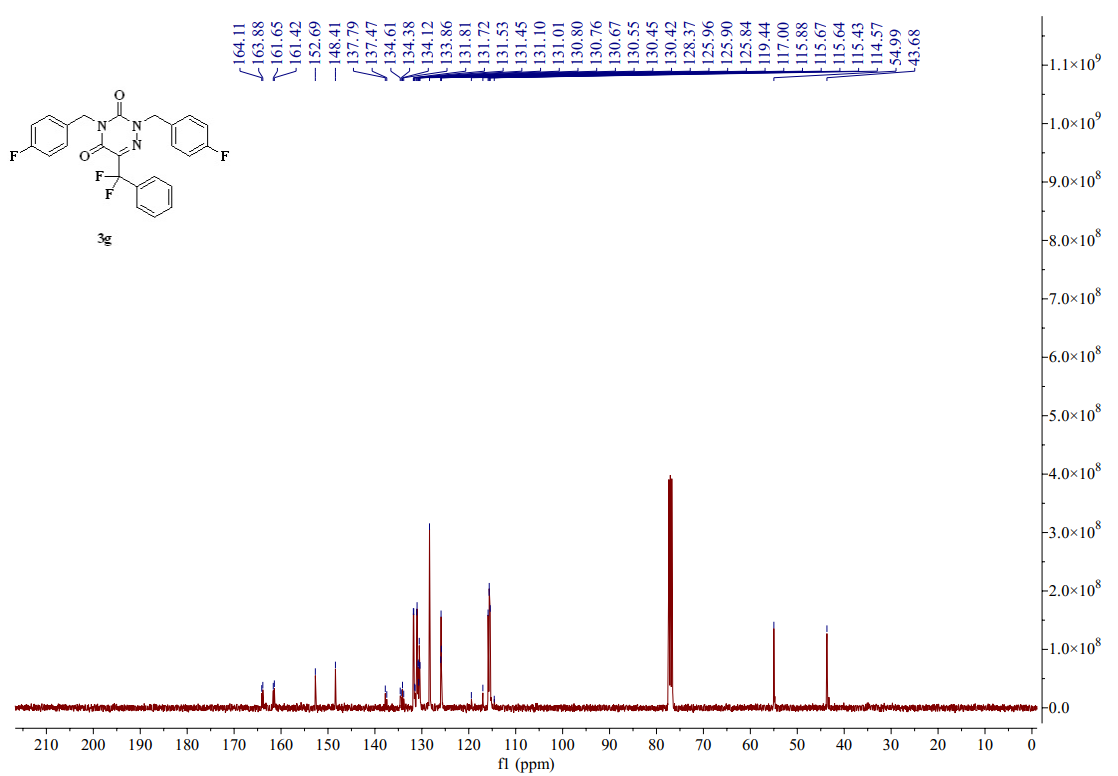


图S1 7-4  13C-NMR spectrum (CDCl3, 101 MHZ) of compound **3g**


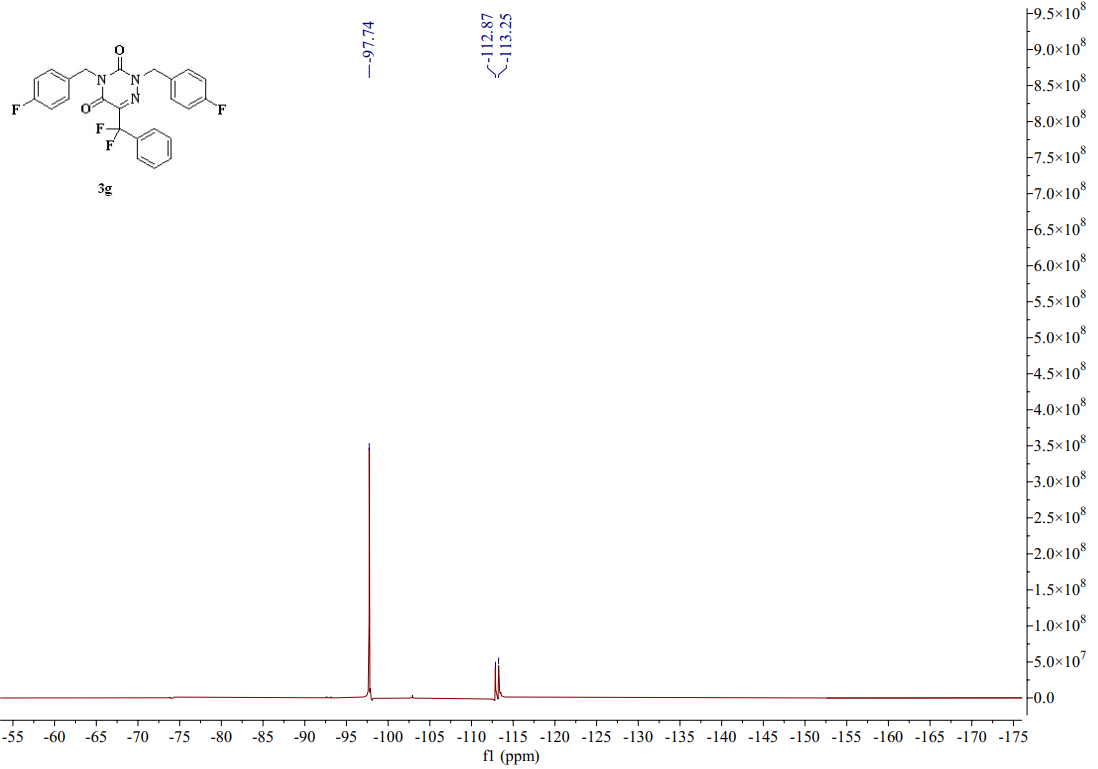


图S1 7-5  19F-NMR spectrum (CDCl3, 376 MHZ) of compound **3g**


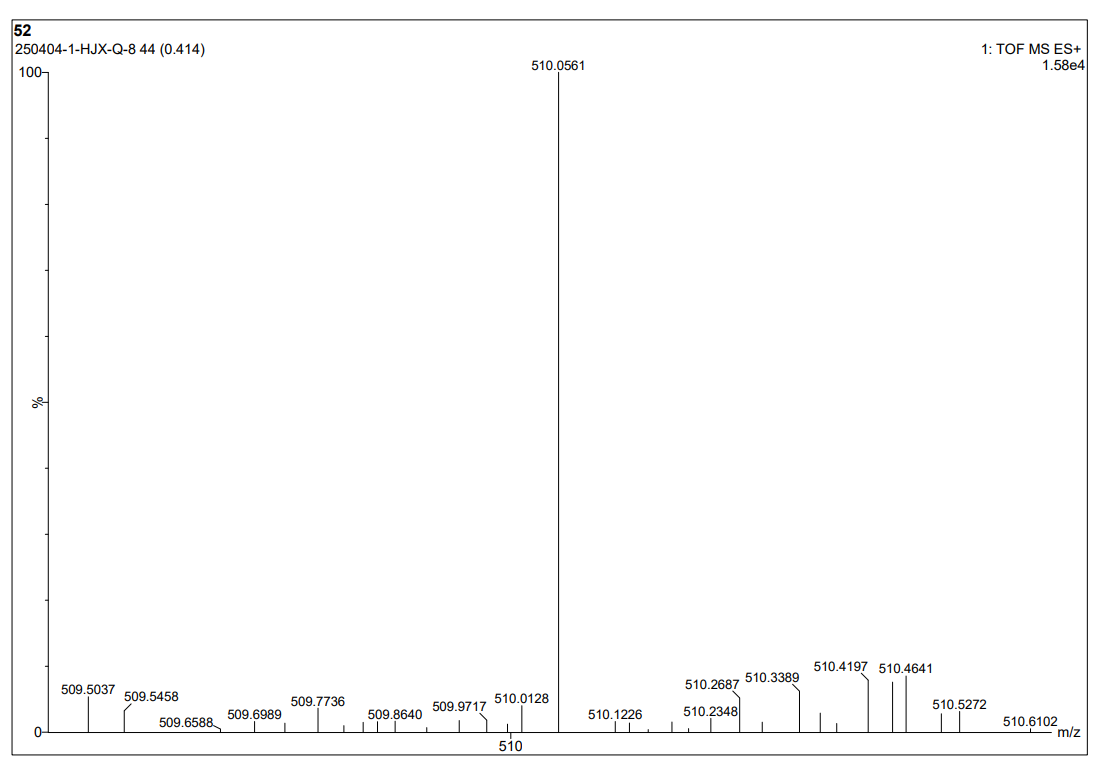


图S1 8-1 HR Mass spectrum (ESI) of compound 3**h**


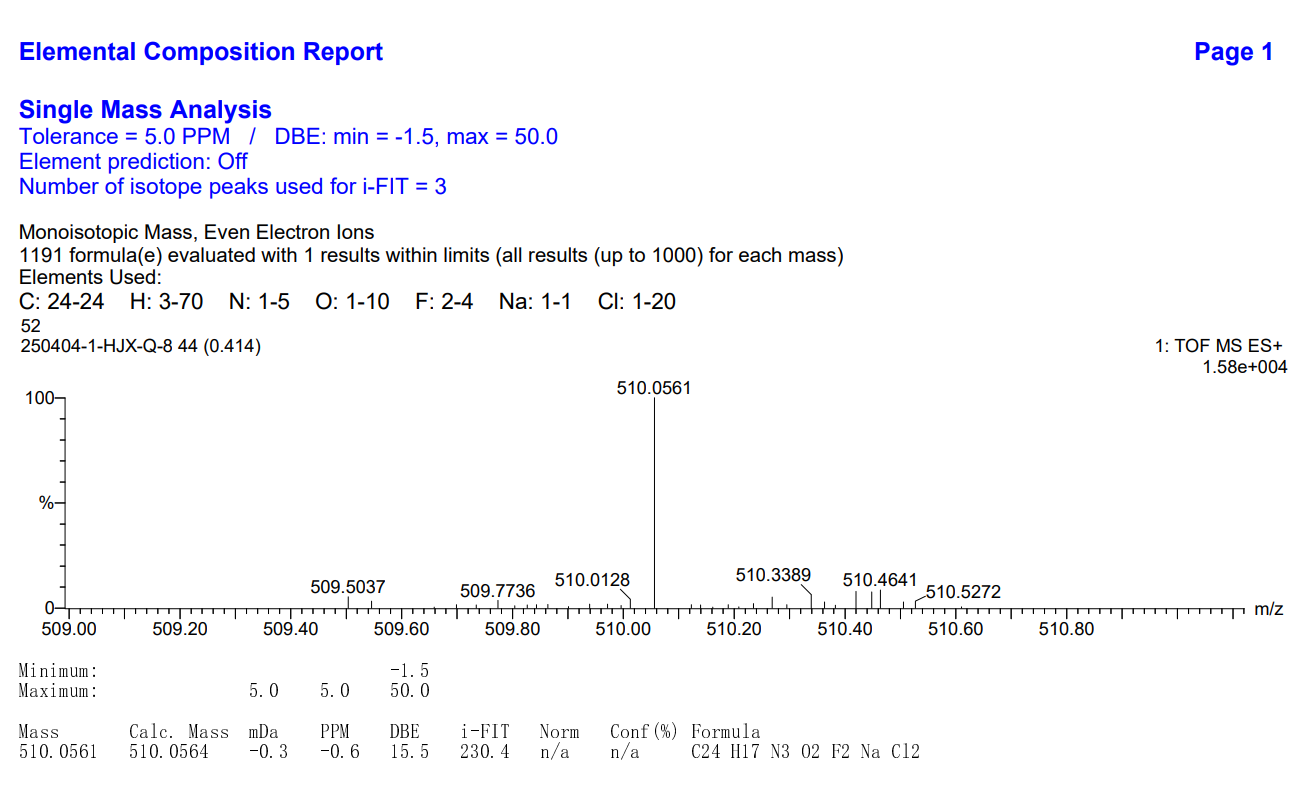


图S1 8-2 HR Mass spectrum (ESI) of compound **3h**


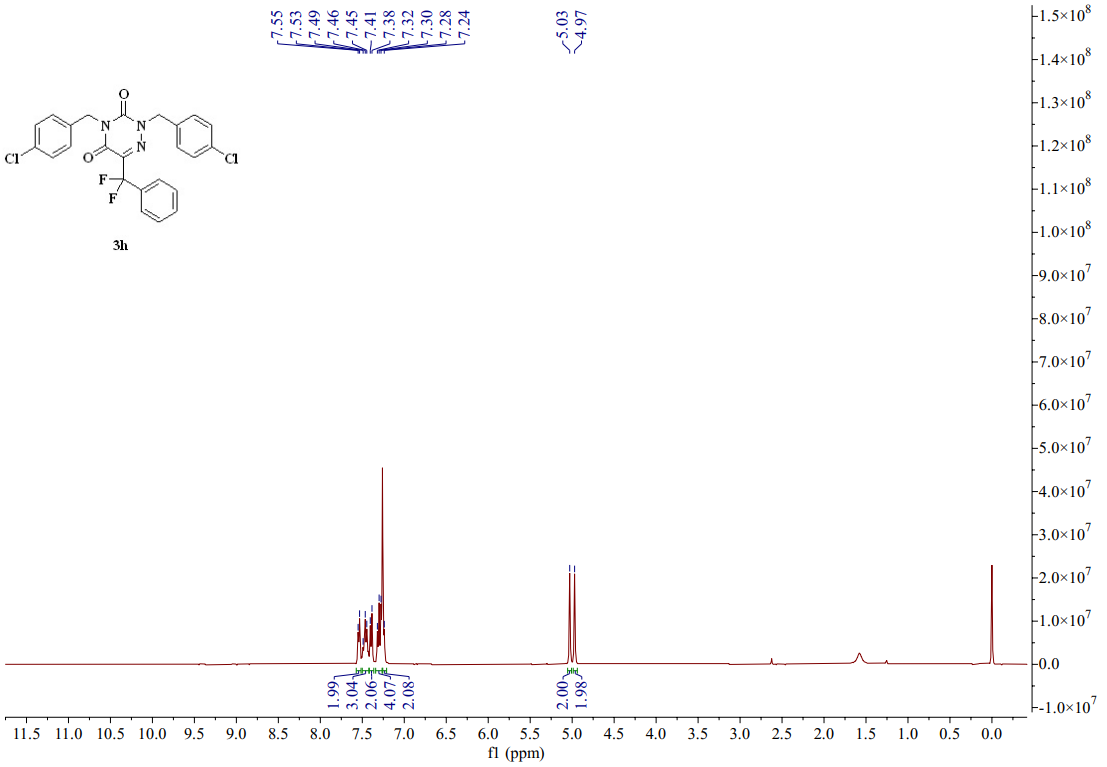


图S1 8-3  1H-NMR spectrum (CDCl3, 400 MHZ) of compound **3h**


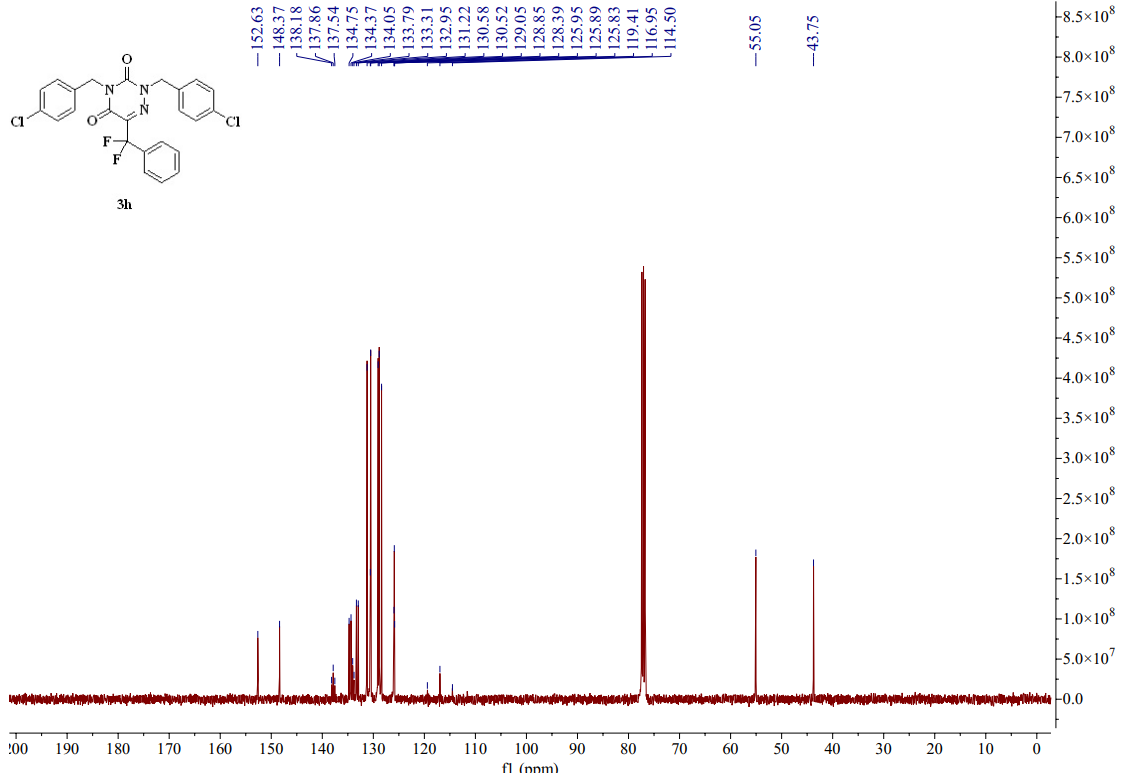


图S1 8-4  13C-NMR spectrum (CDCl3, 101MHZ) of compound **3h**


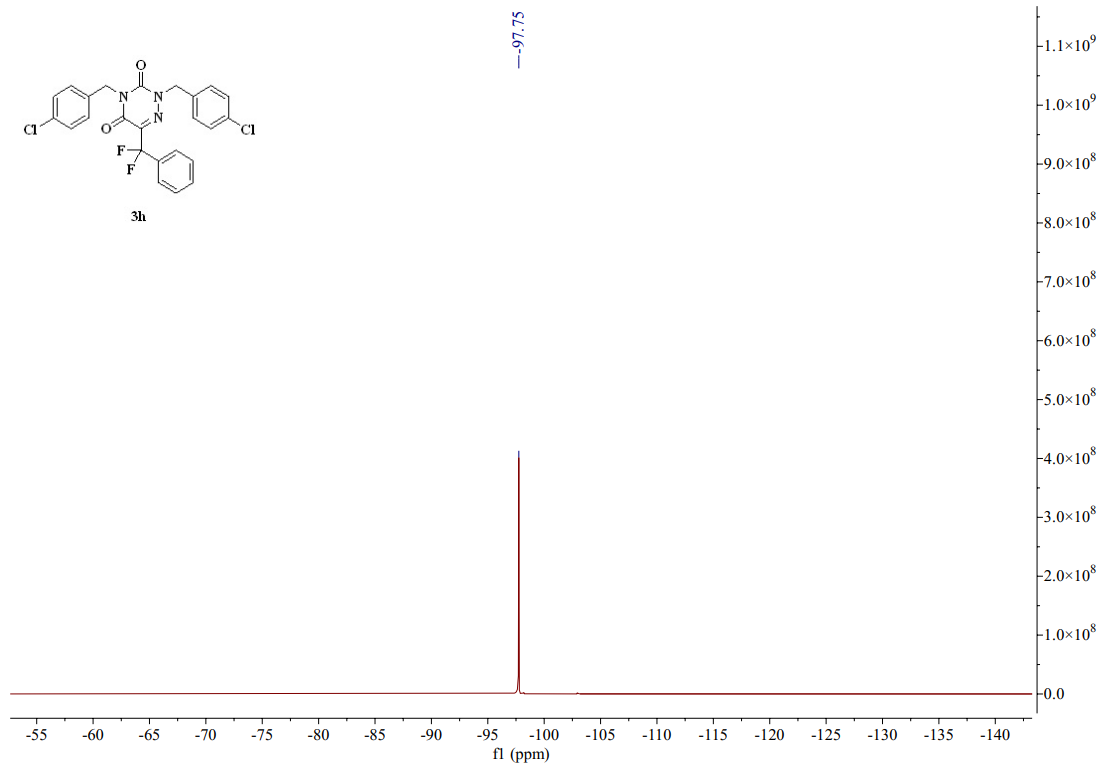


图S1 8-5  19F-NMR spectrum (CDCl3, 376 MHZ) of compound **3h**


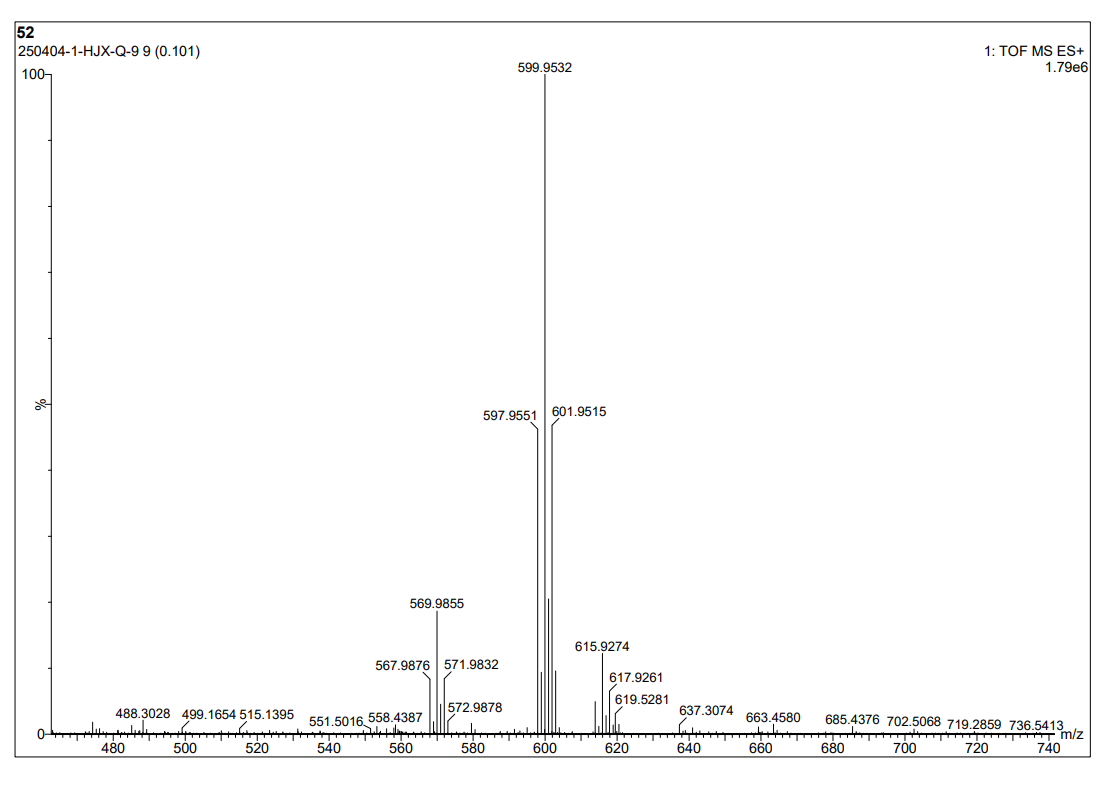


图S1 9-1 HR Mass spectrum (ESI) of compound **3i**


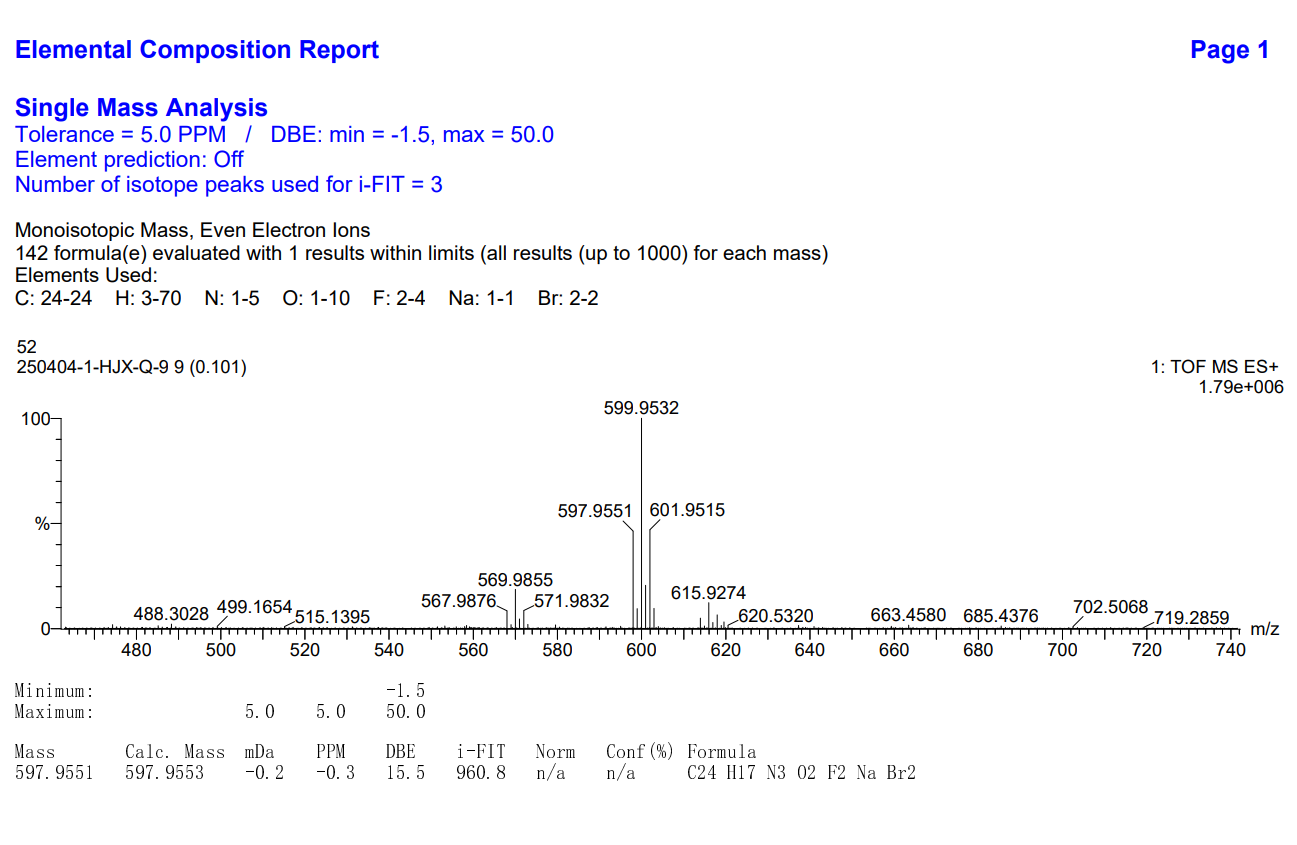


图S1 9-2 HR Mass spectrum (ESI) of compound **3i**


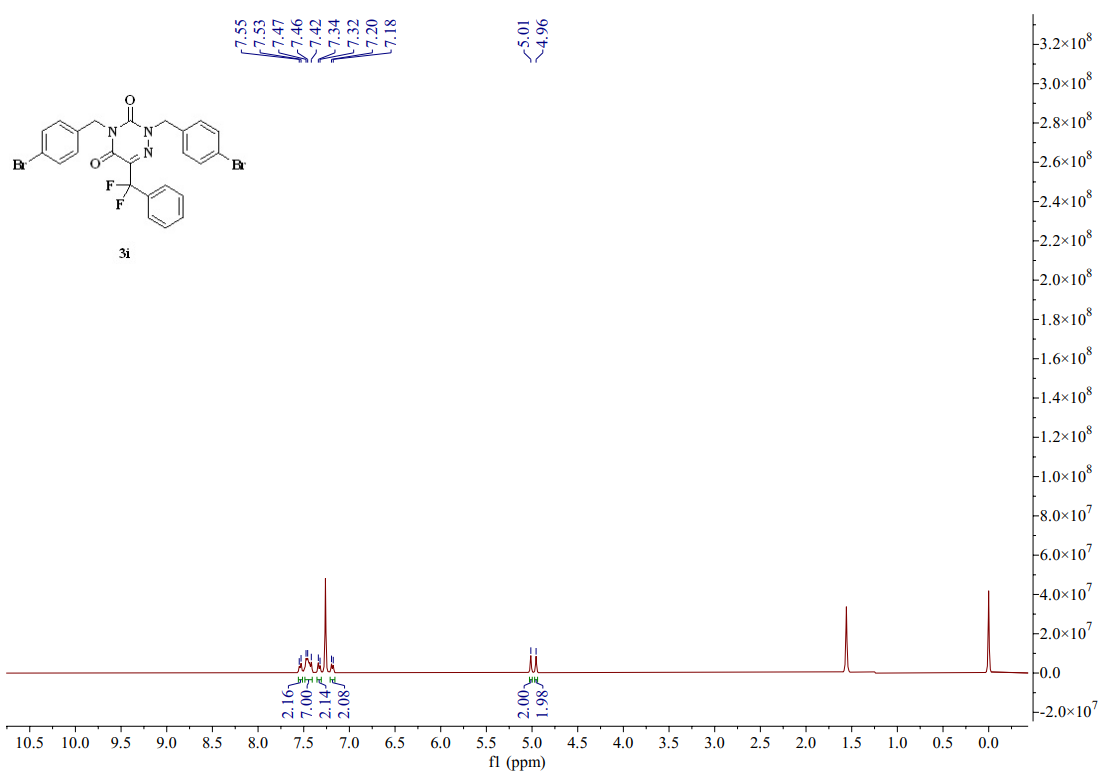


图S1 9-3  1H-NMR spectrum (CDCl3, 400 MHZ) of compound **3i**


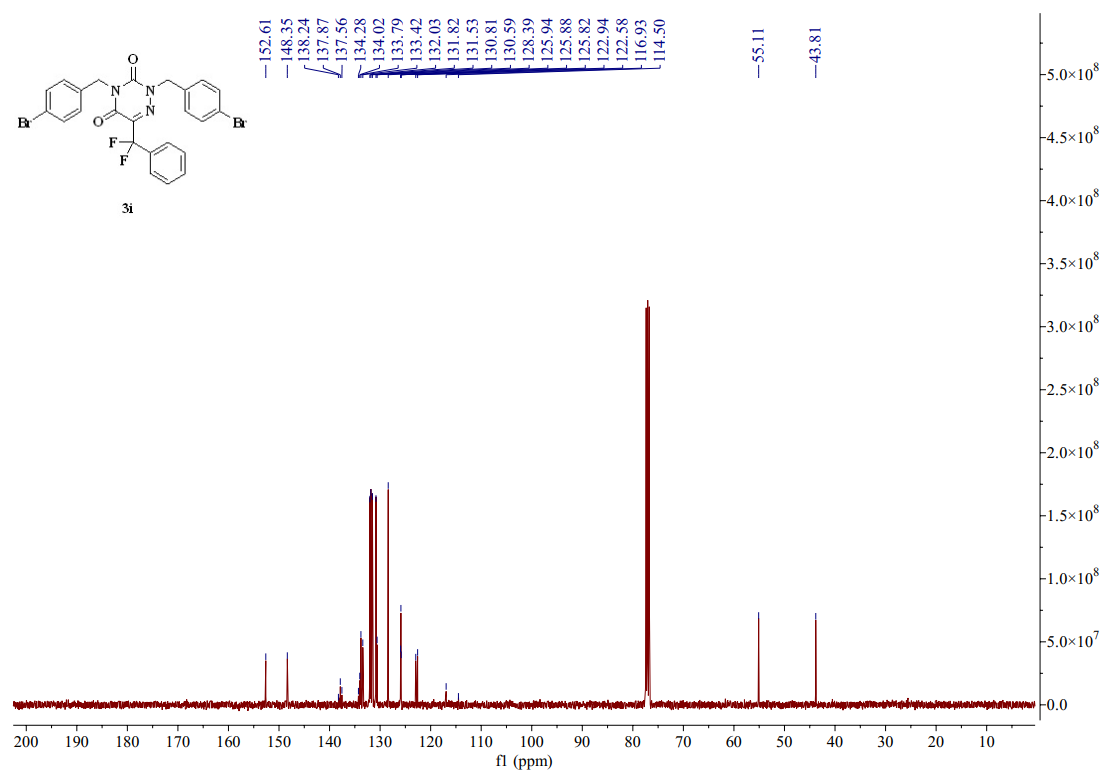


图S1 9-4  13C-NMR spectrum (CDCl3, 101 MHZ) of compound **3i**


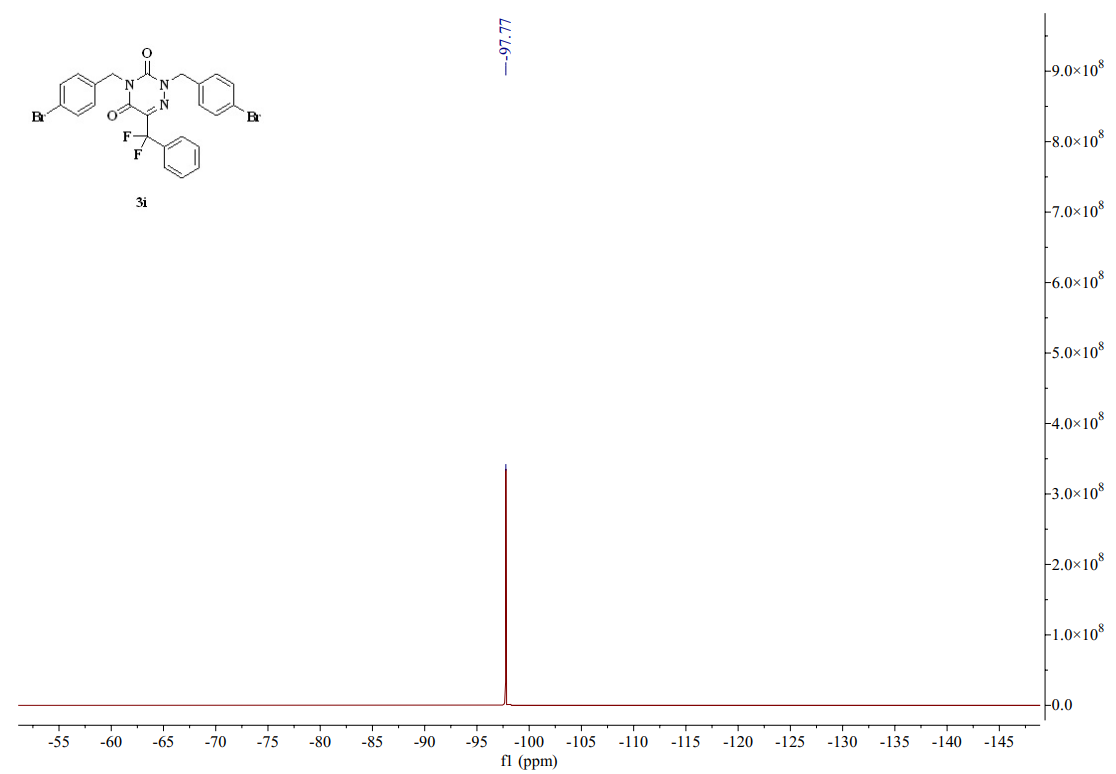


图S1 9-5  19F-NMR spectrum (CDCl3, 376 MHZ) of compound **3i**


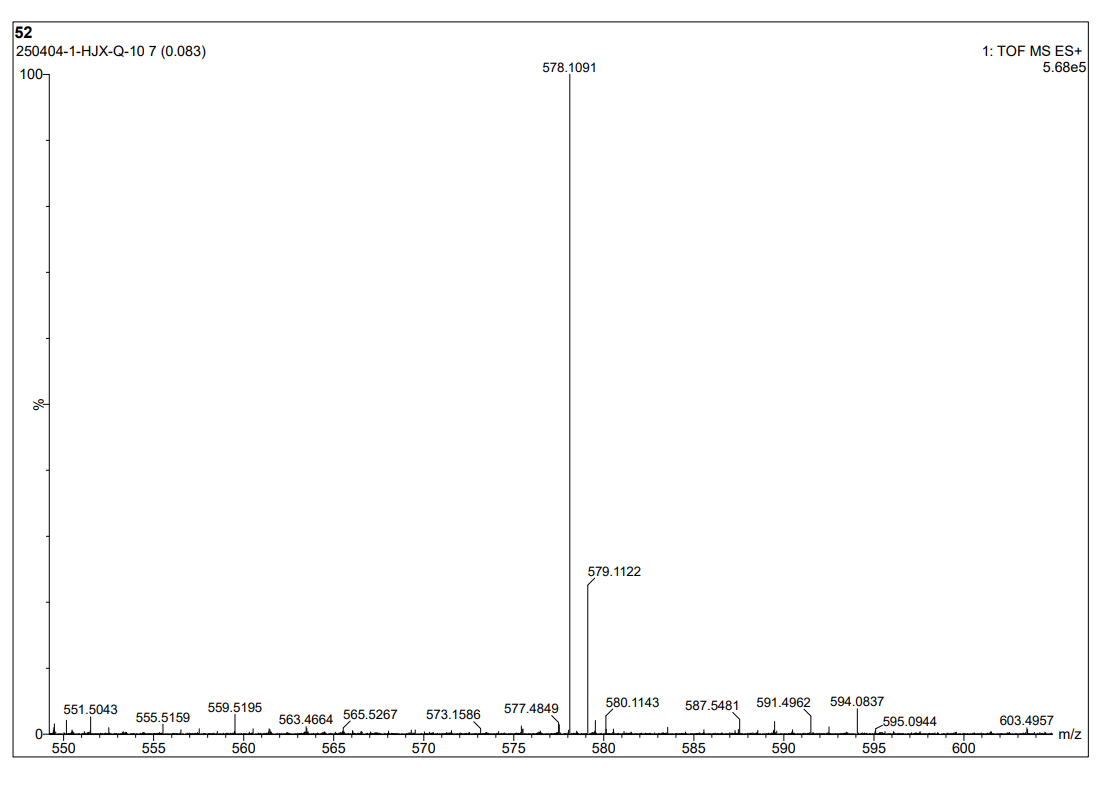


图S1 10-1 HR Mass spectrum (ESI) of compound **3j**


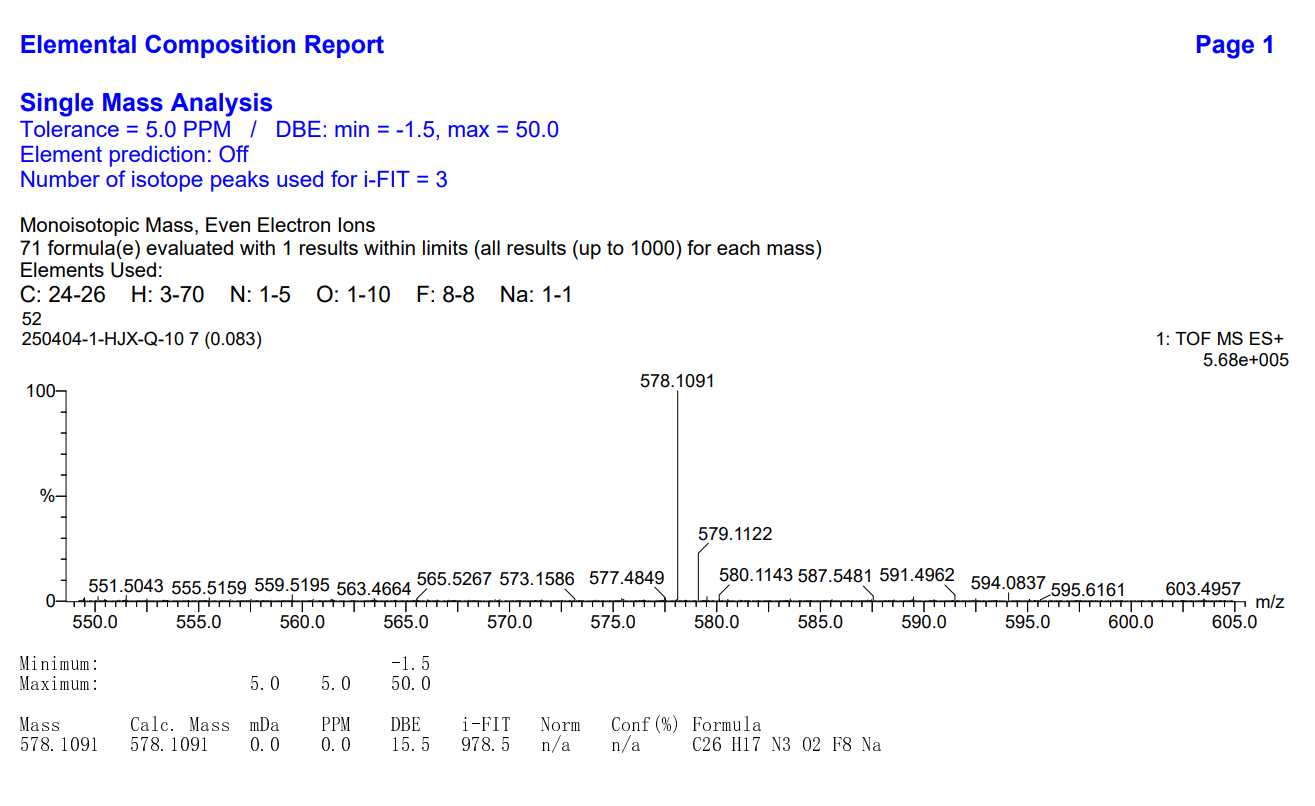


图S1 10-2 HR Mass spectrum (ESI) of compound **3j**


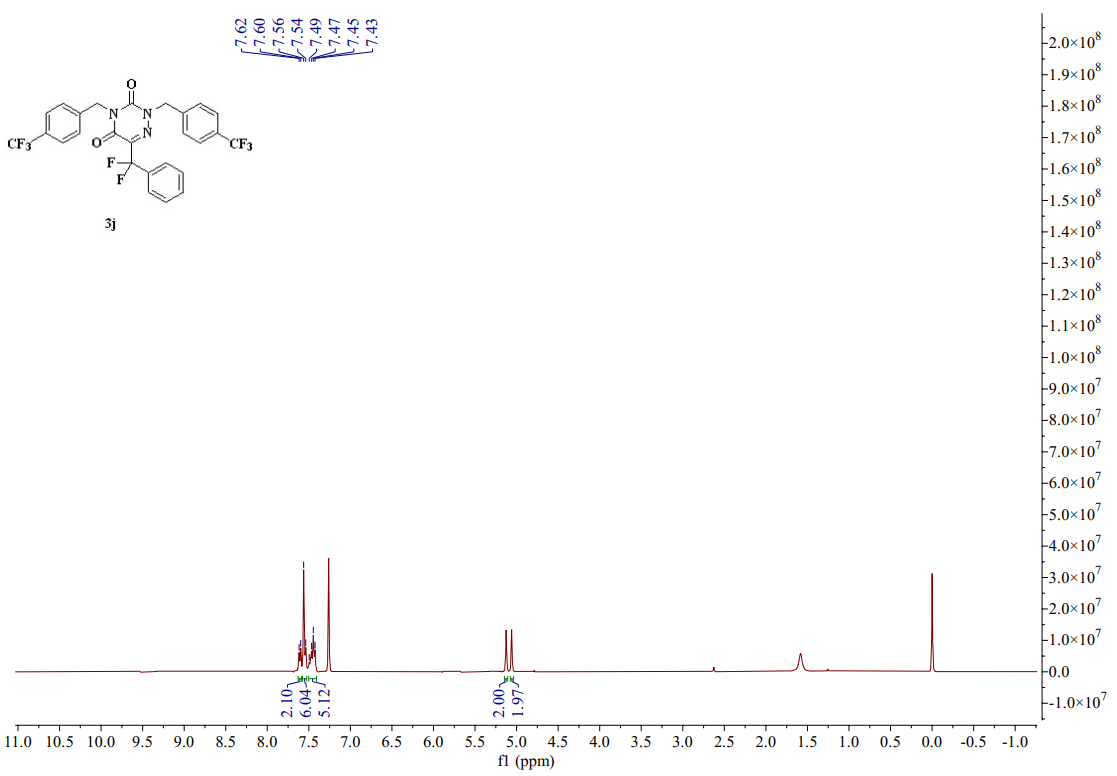


图S1 10-3  1H-NMR spectrum (CDCl3, 400 MHZ) of compound **3j**


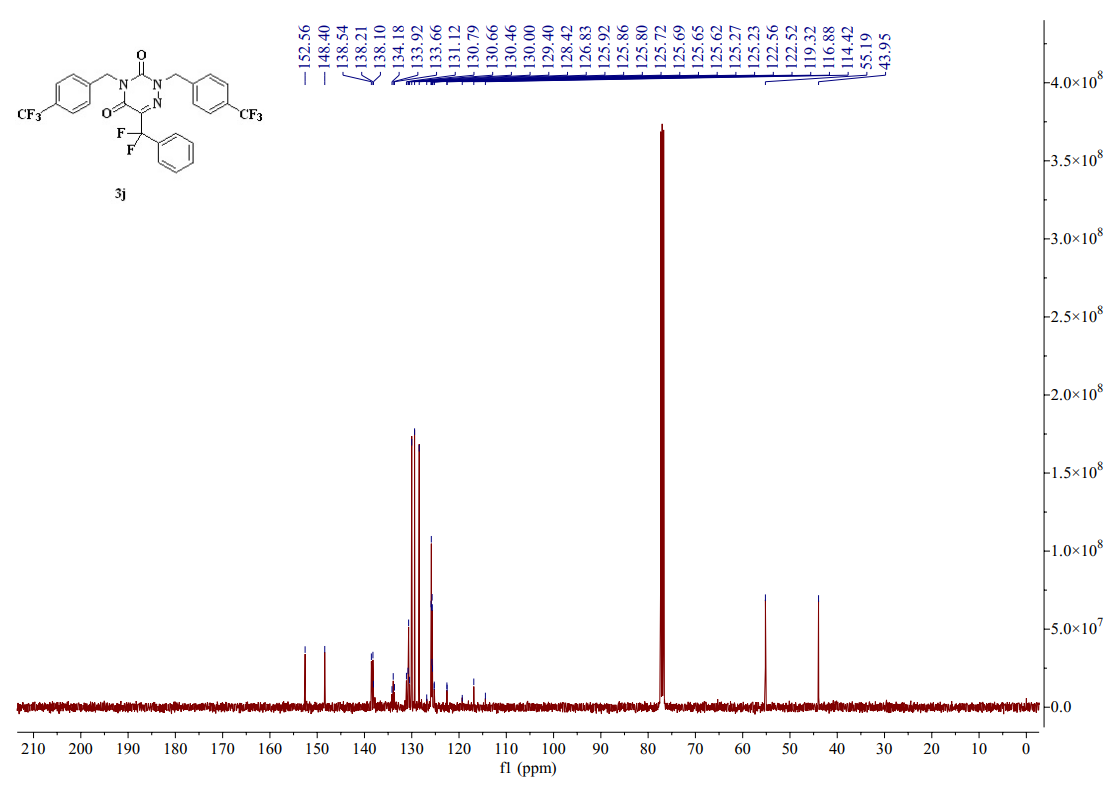


图S1 10-4  13C-NMR spectrum (CDCl3, 101 MHZ) of compound **3j**


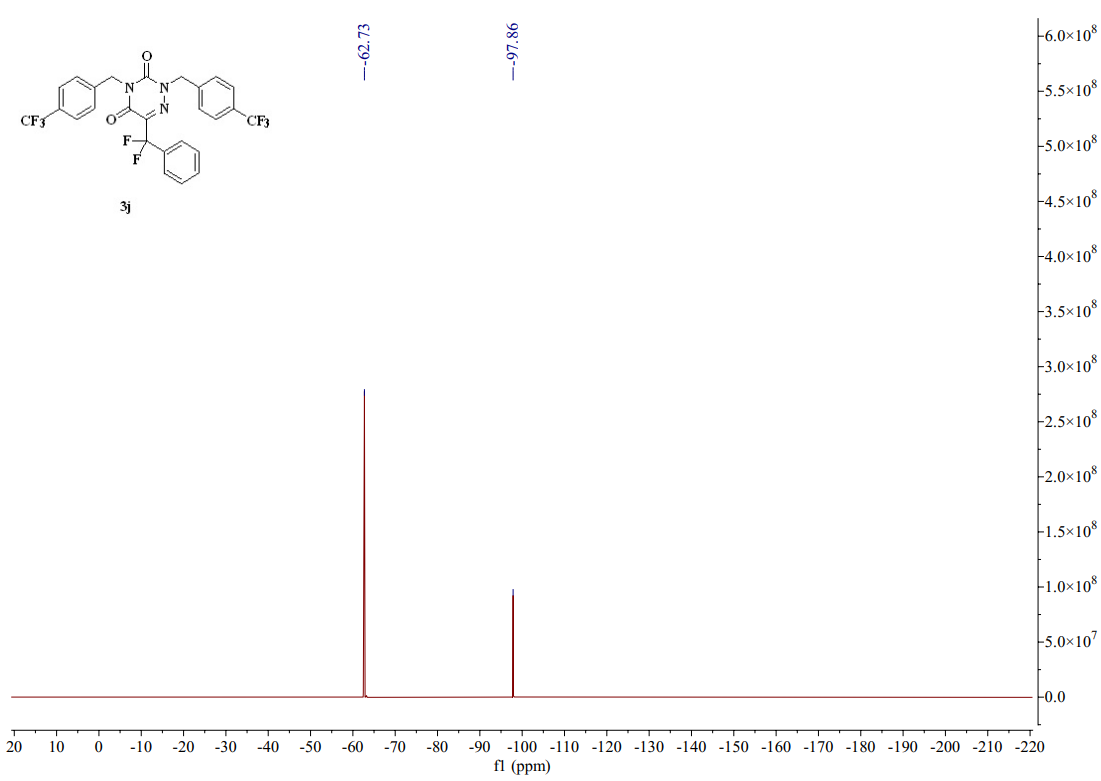


图S1 10-5  19F-NMR spectrum (CDCl3, 376 MHZ) of compound **3j**


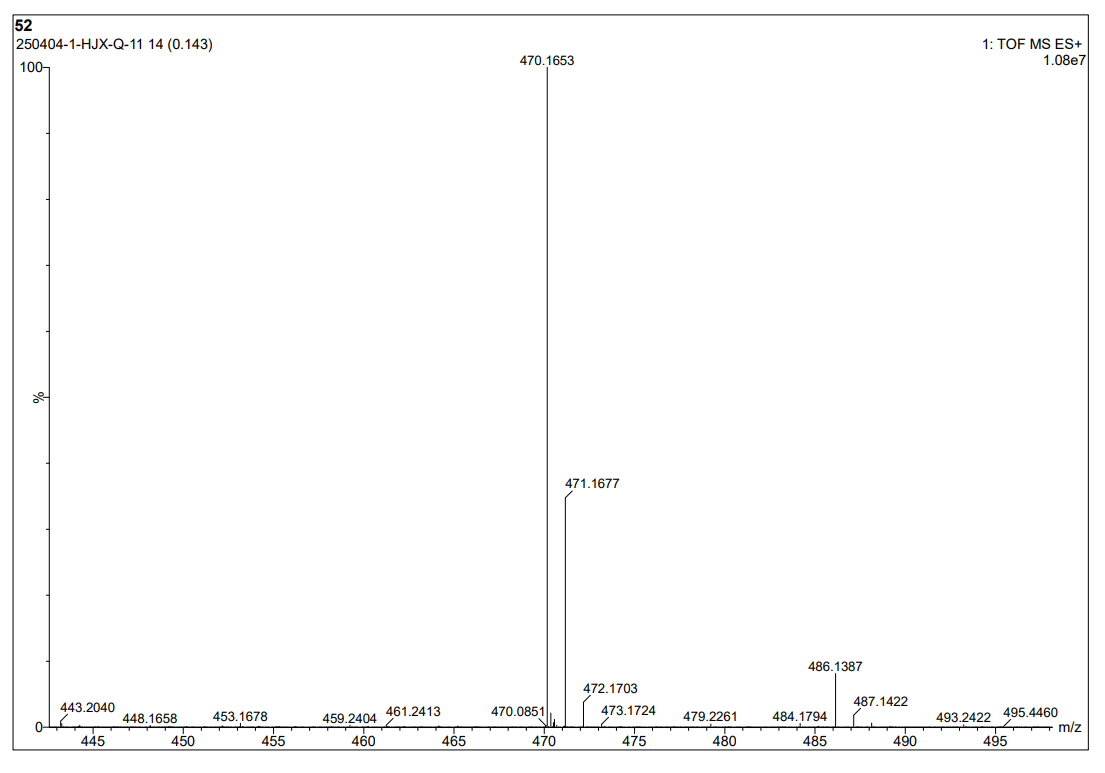


图S1 11-1 HR Mass spectrum (ESI) of compound **3k**


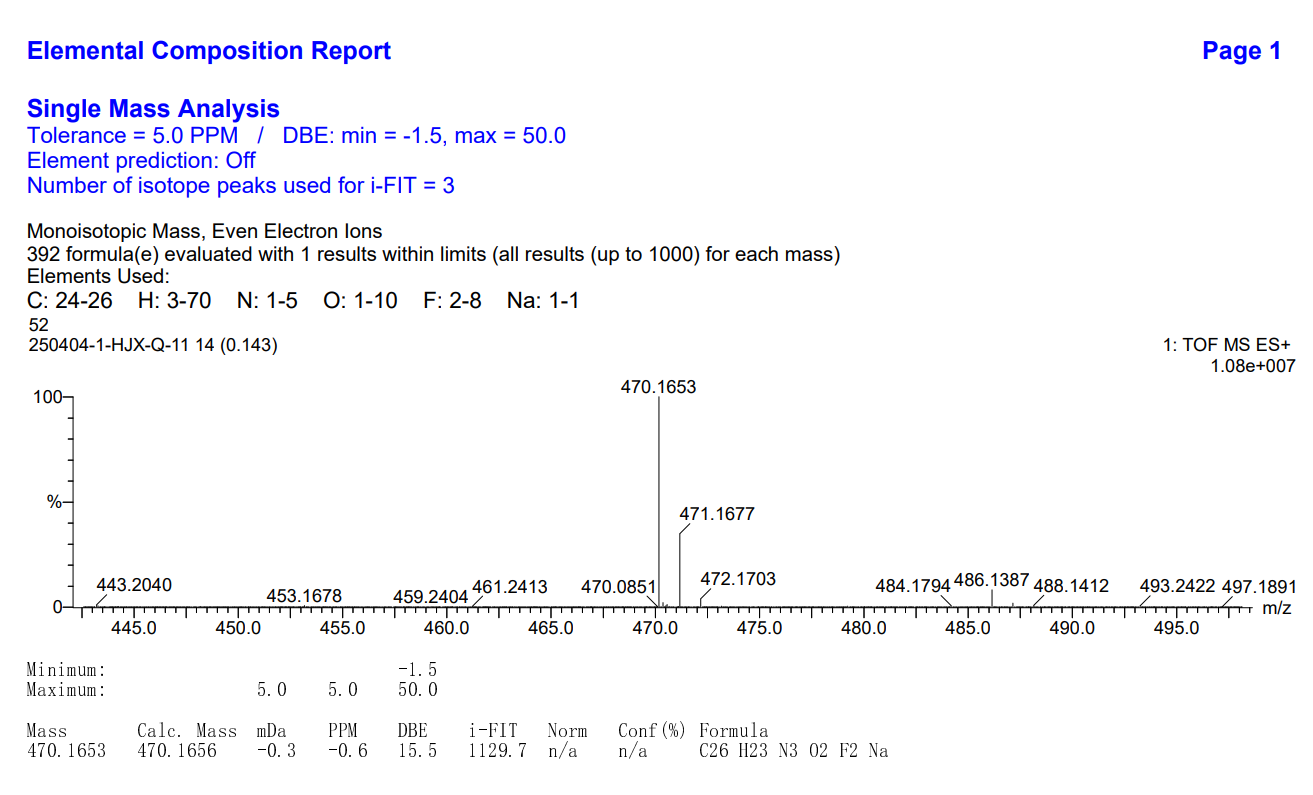


图S1 11-2 HR Mass spectrum (ESI) of compound **3k**


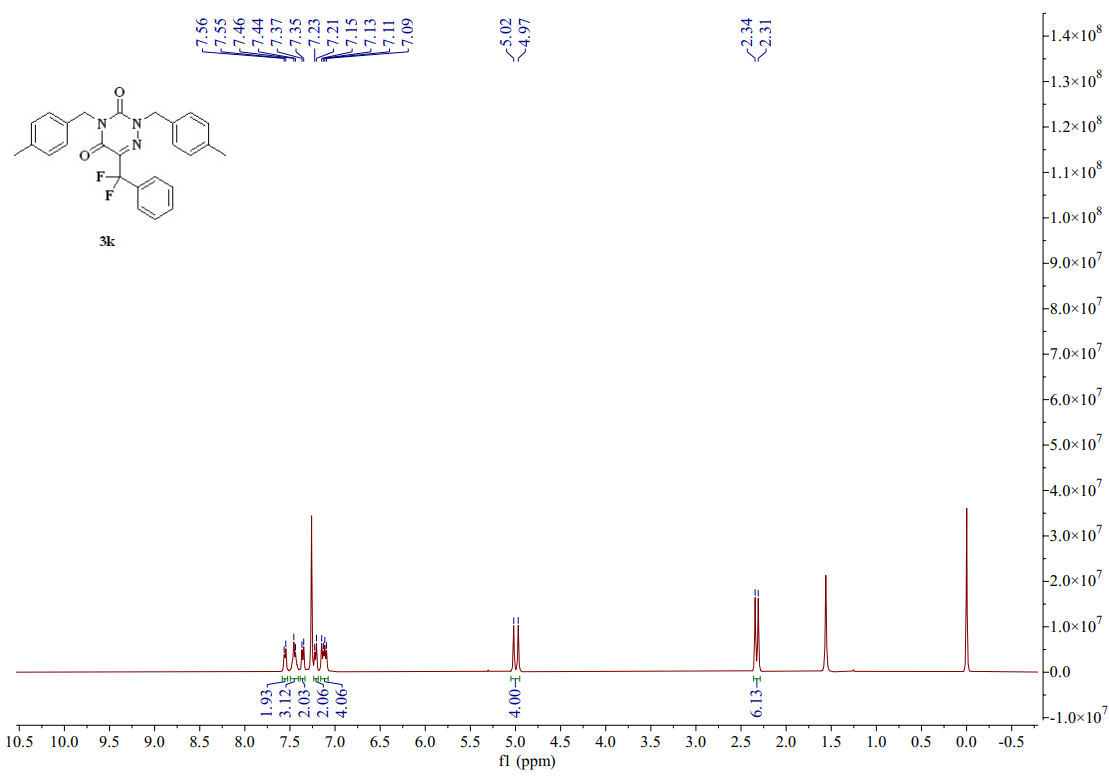


图S1 11-3  1H-NMR spectrum (CDCl3, 400 MHZ) of compound **3k**


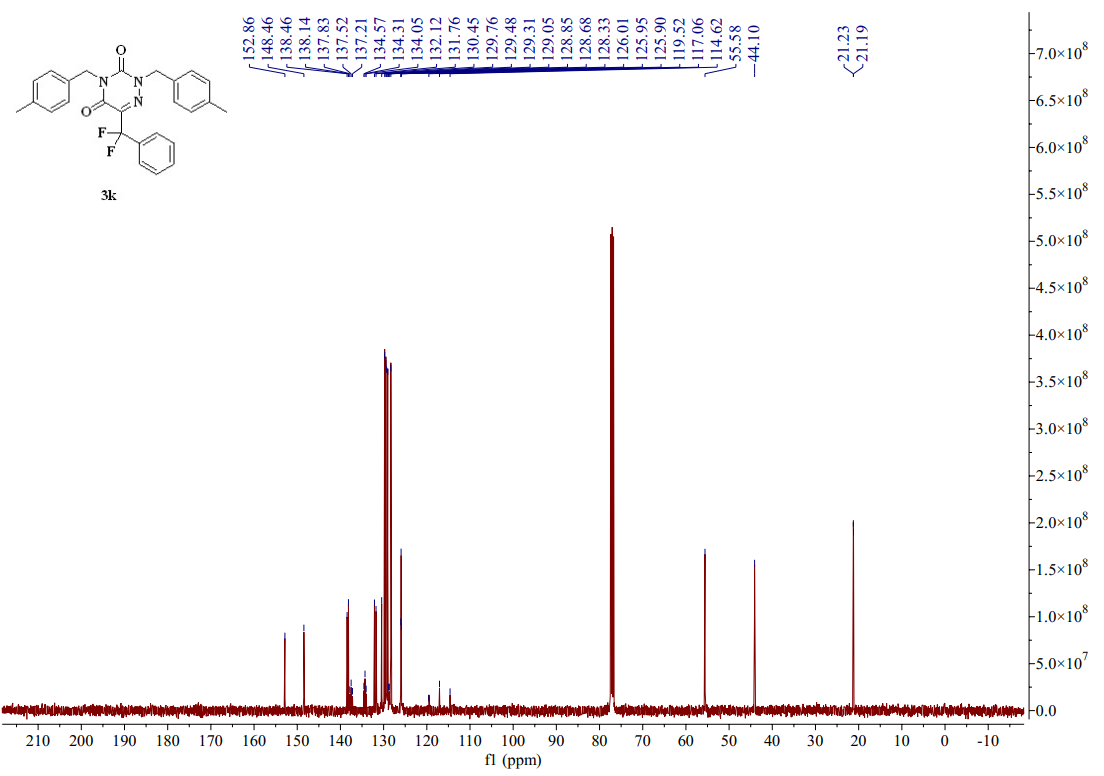


图S1 11-4  13C-NMR spectrum (CDCl3, 101 MHZ) of compound **3k**


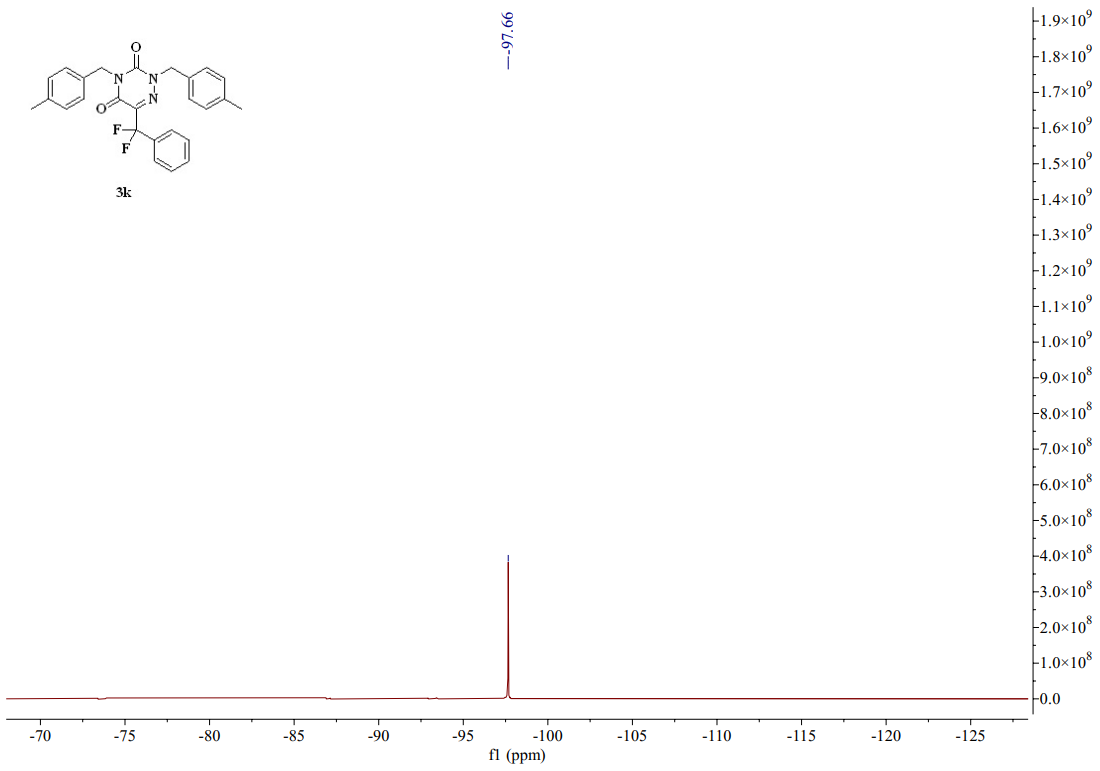


图S1 11-5  19F-NMR spectrum (CDCl3, 376 MHZ) of compound **3k**


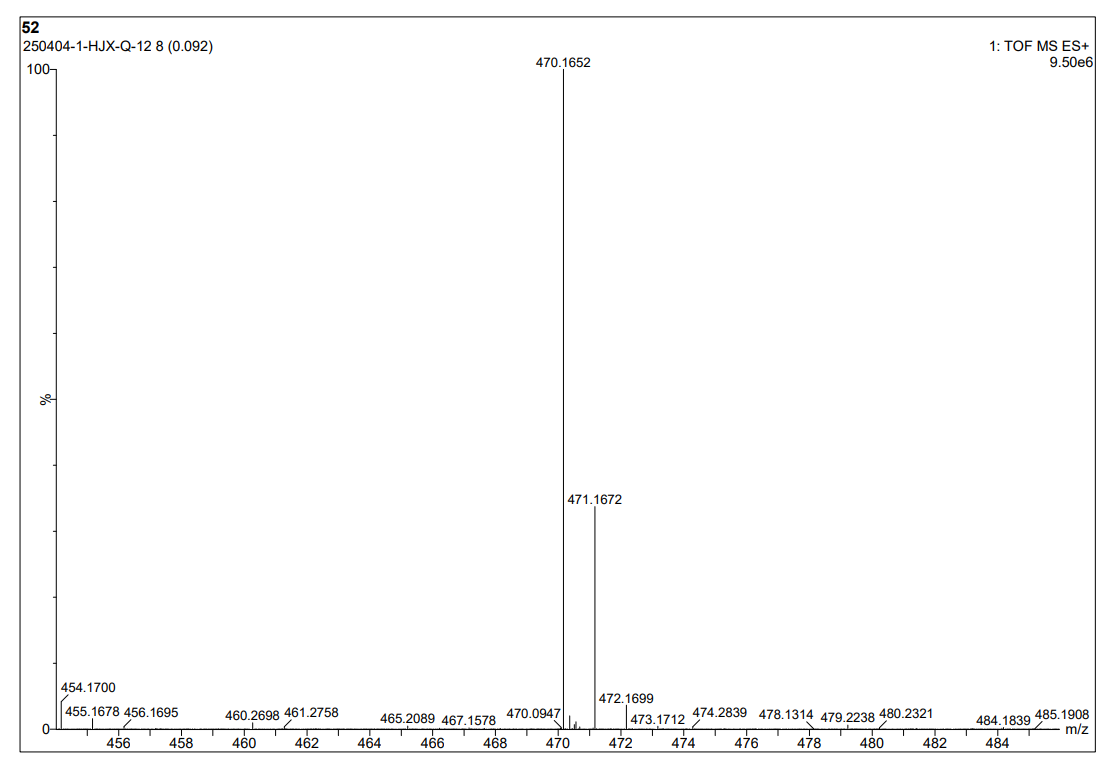


图S1 12-1 HR Mass spectrum (ESI) of compound **3l**


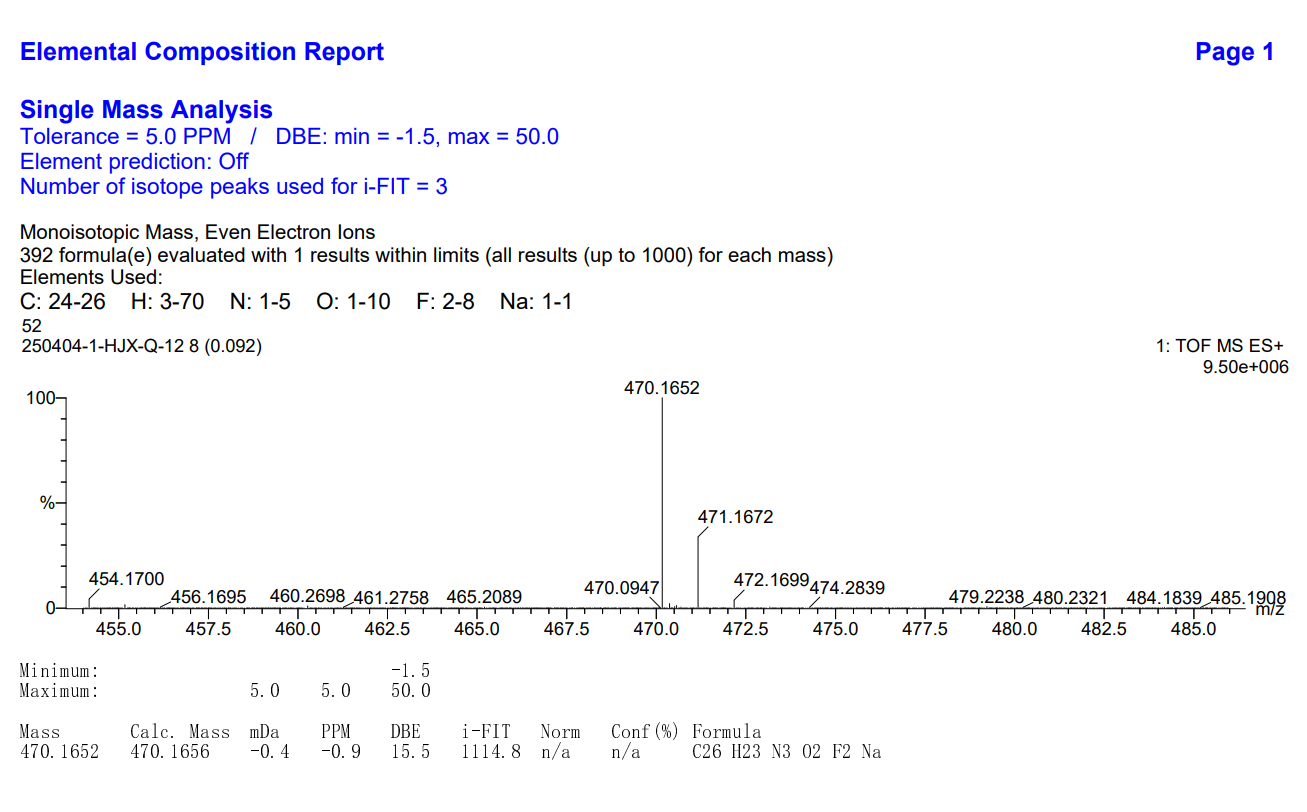


图S1 12-2 HR Mass spectrum (ESI) of compound **3l**


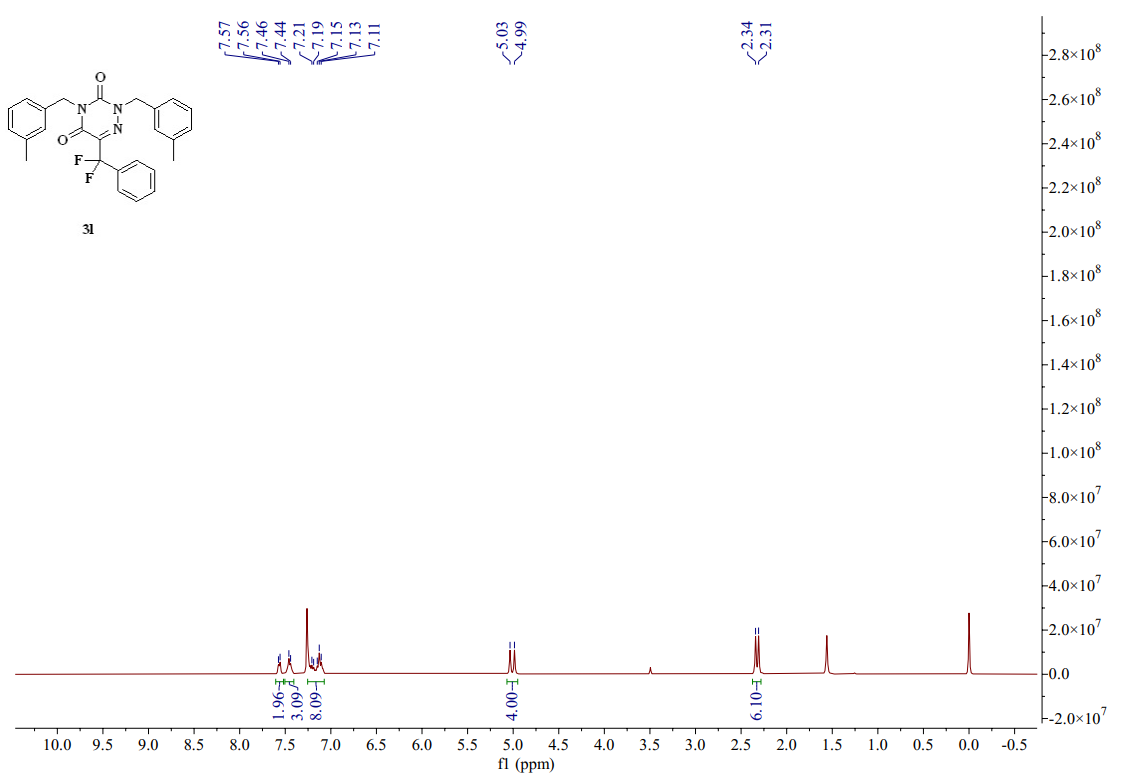


图S1 12-3  1H-NMR spectrum (CDCl3, 400 MHZ) of compound **3l**


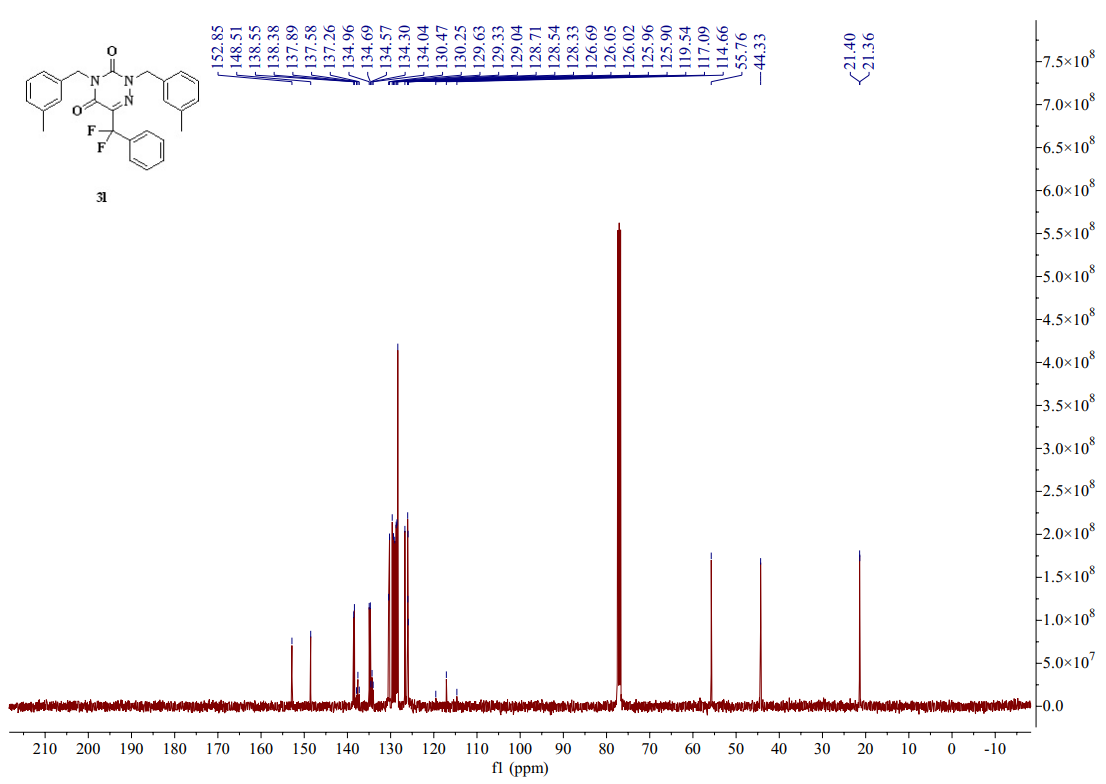


图S1 12-4  13C-NMR spectrum (CDCl3, 101 MHZ) of compound **3l**


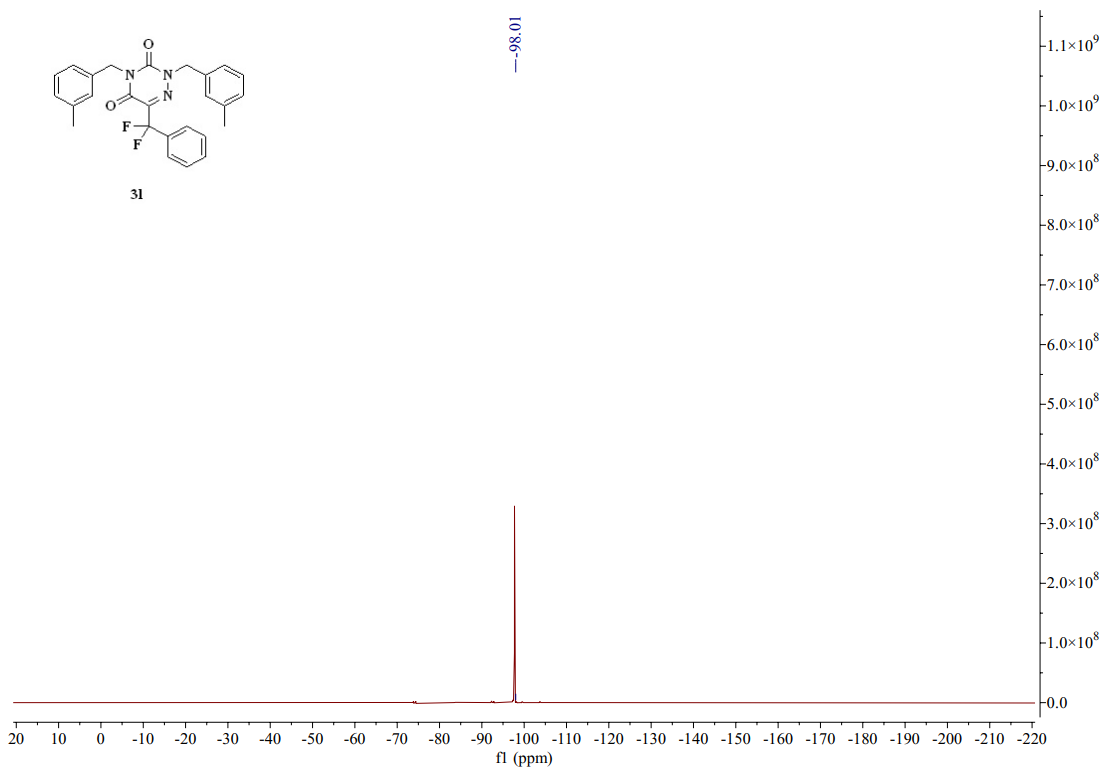


图S1 12-5  19F-NMR spectrum (CDCl3, 376MHZ) of compound **3l**


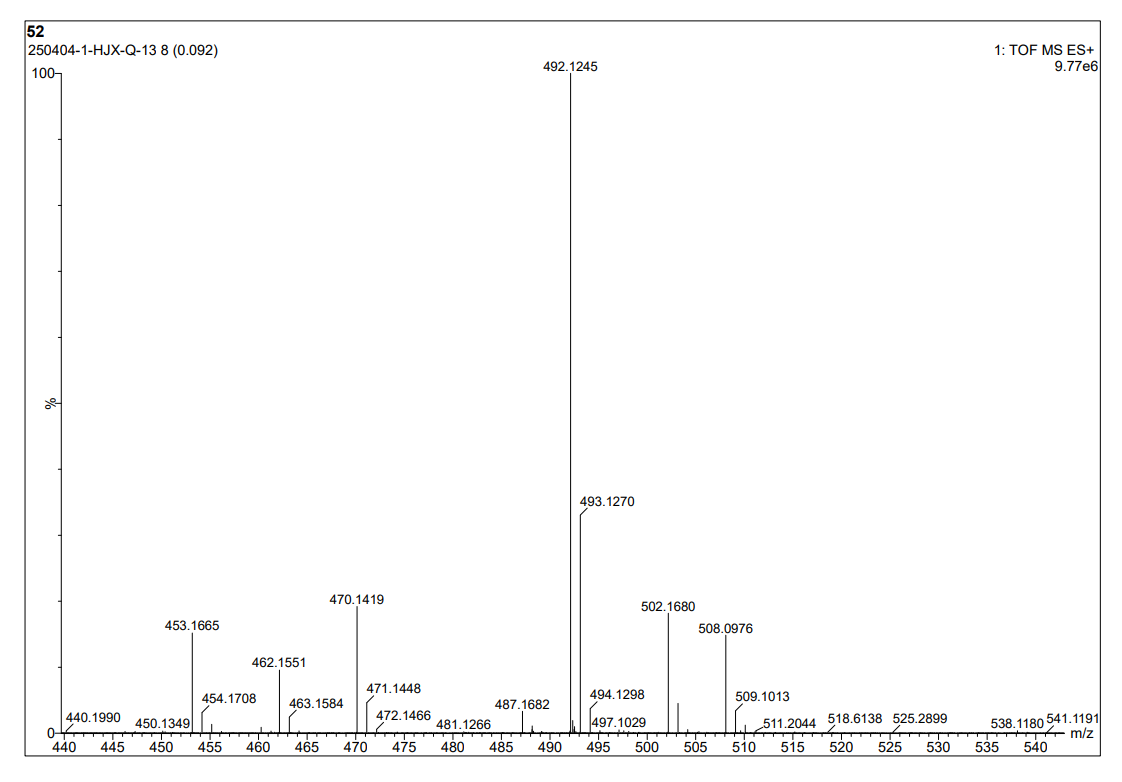


图S1 13-1 HR Mass spectrum (ESI) of compound **3m**


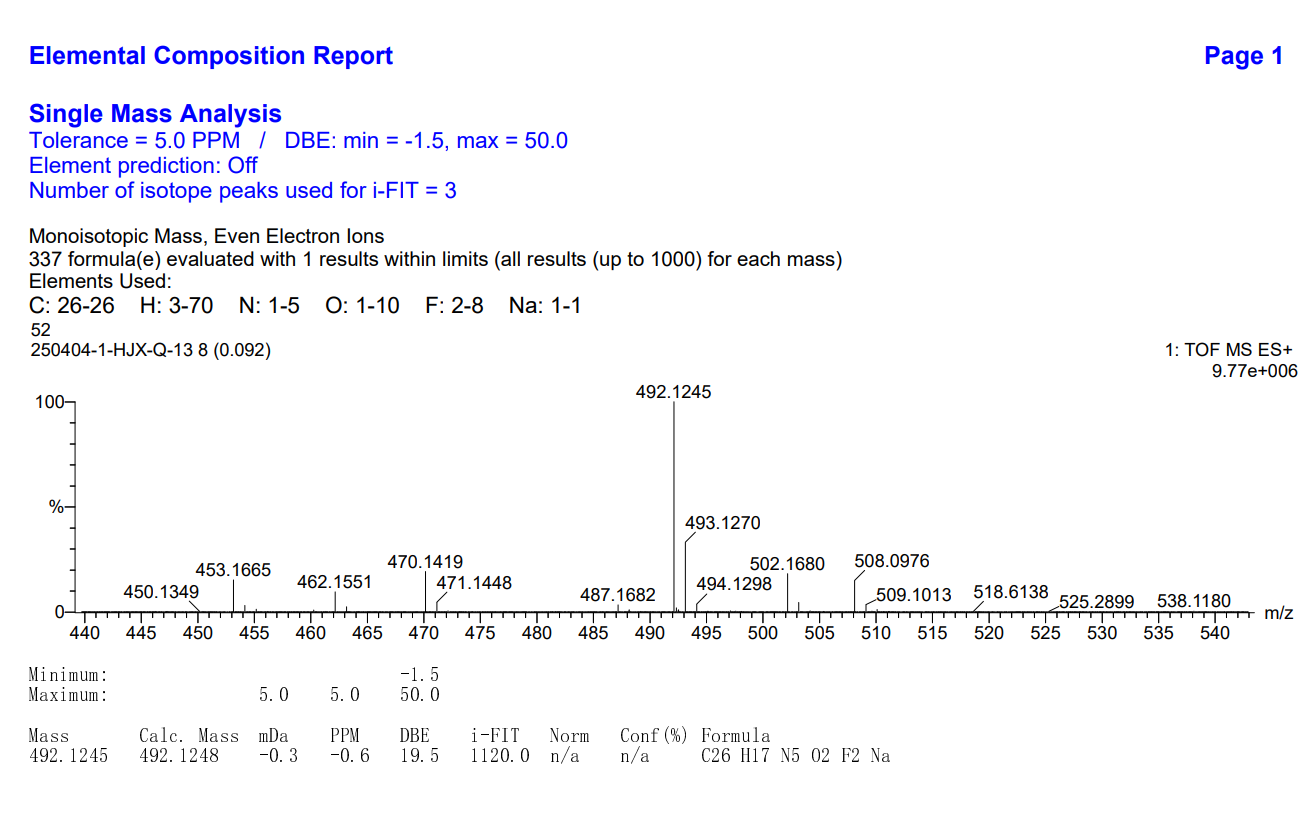


图S1 13-2 HR Mass spectrum (ESI) of compound **3m**


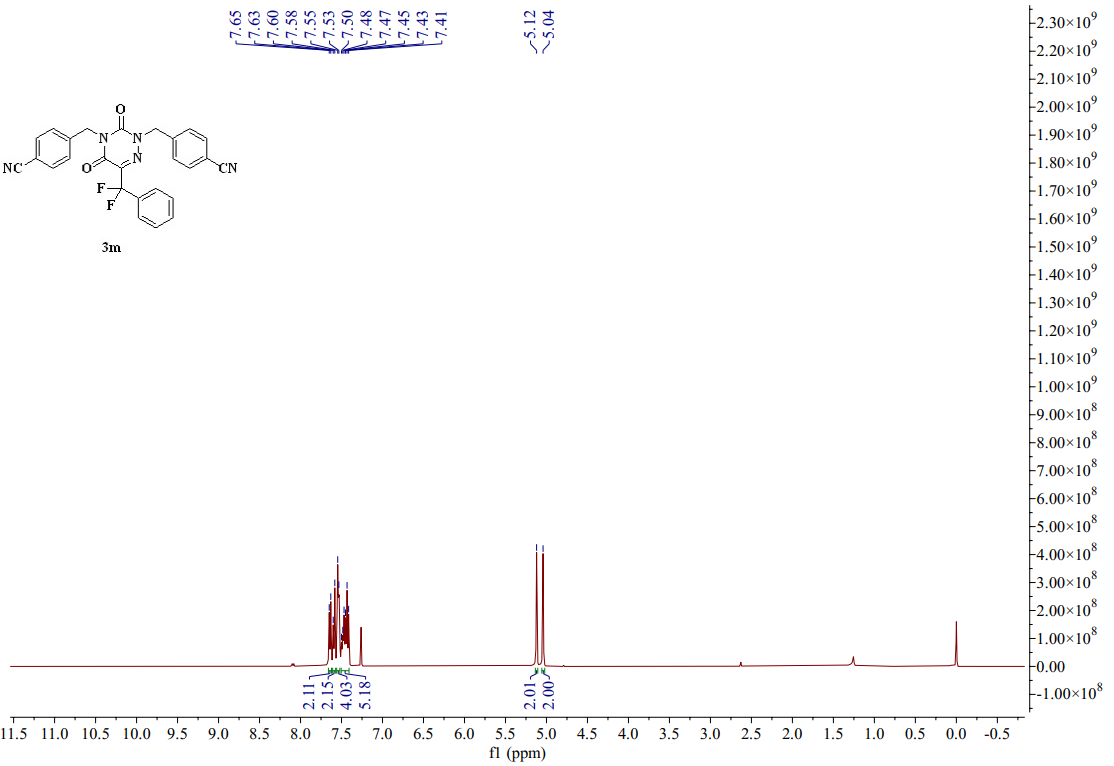


图S1 13-3  1H-NMR spectrum (CDCl3, 400 MHZ) of compound **3m**


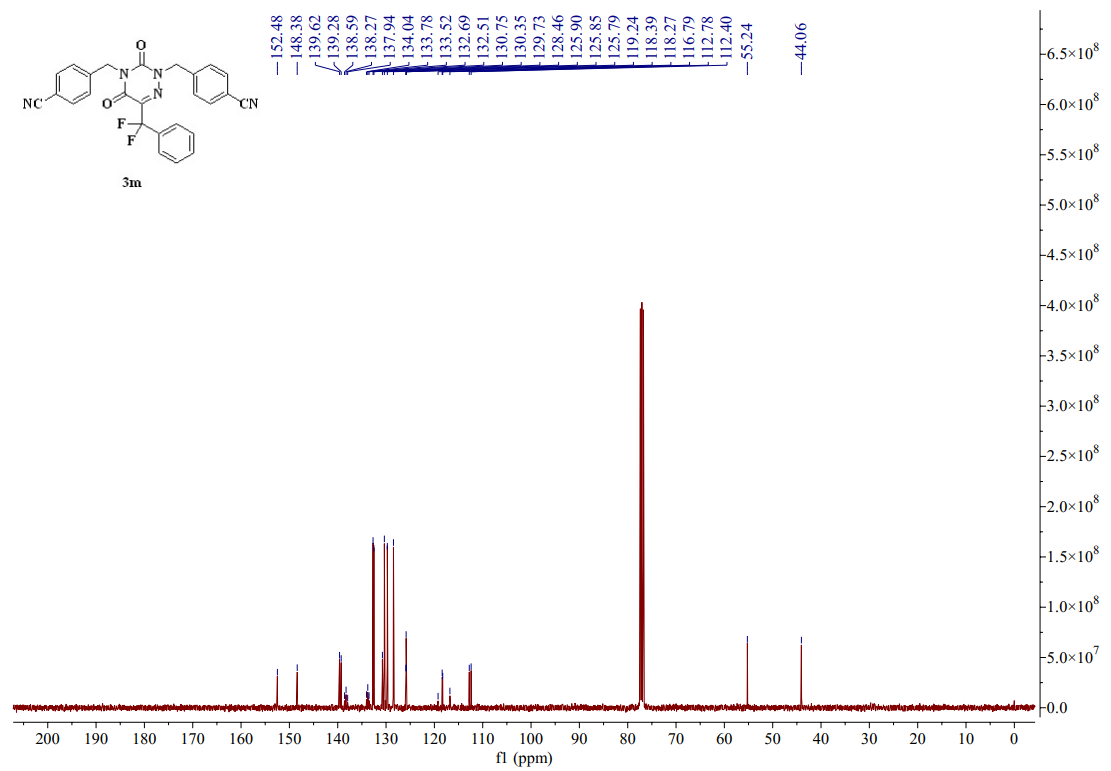


图S1 13-4  13C-NMR spectrum (CDCl3, 101 MHZ) of compound **3m**


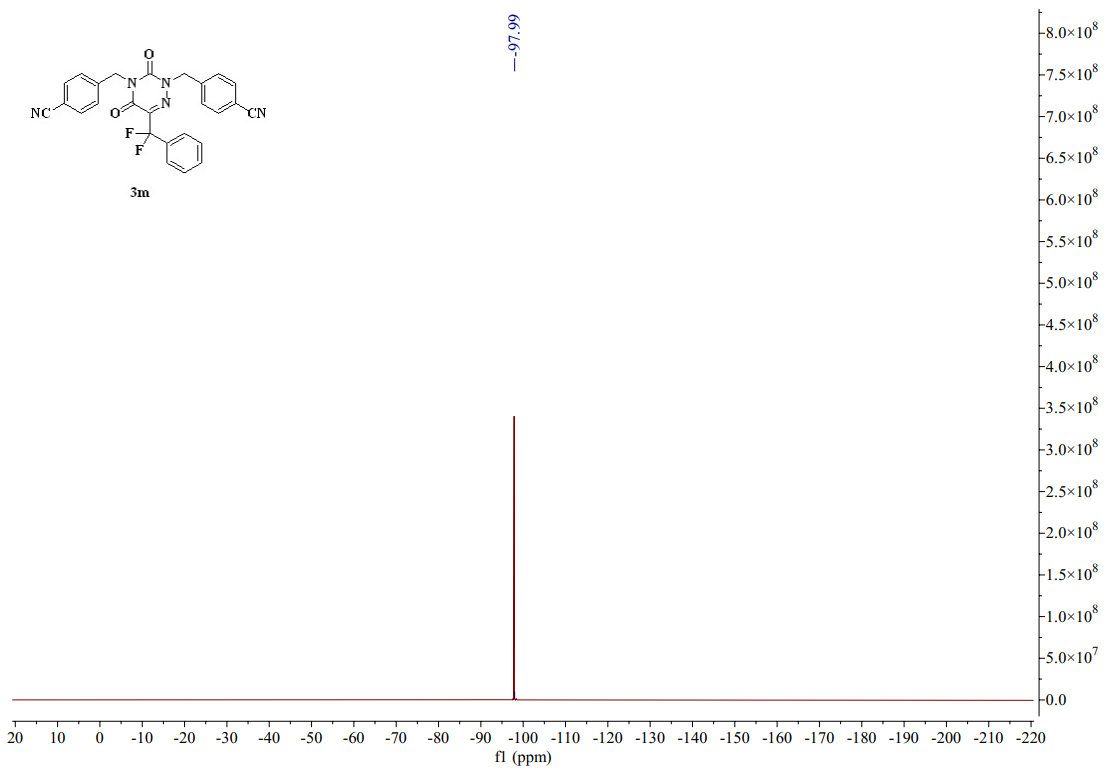


图S1 13-5  19F-NMR spectrum (CDCl3, 376 MHZ) of compound **3m**


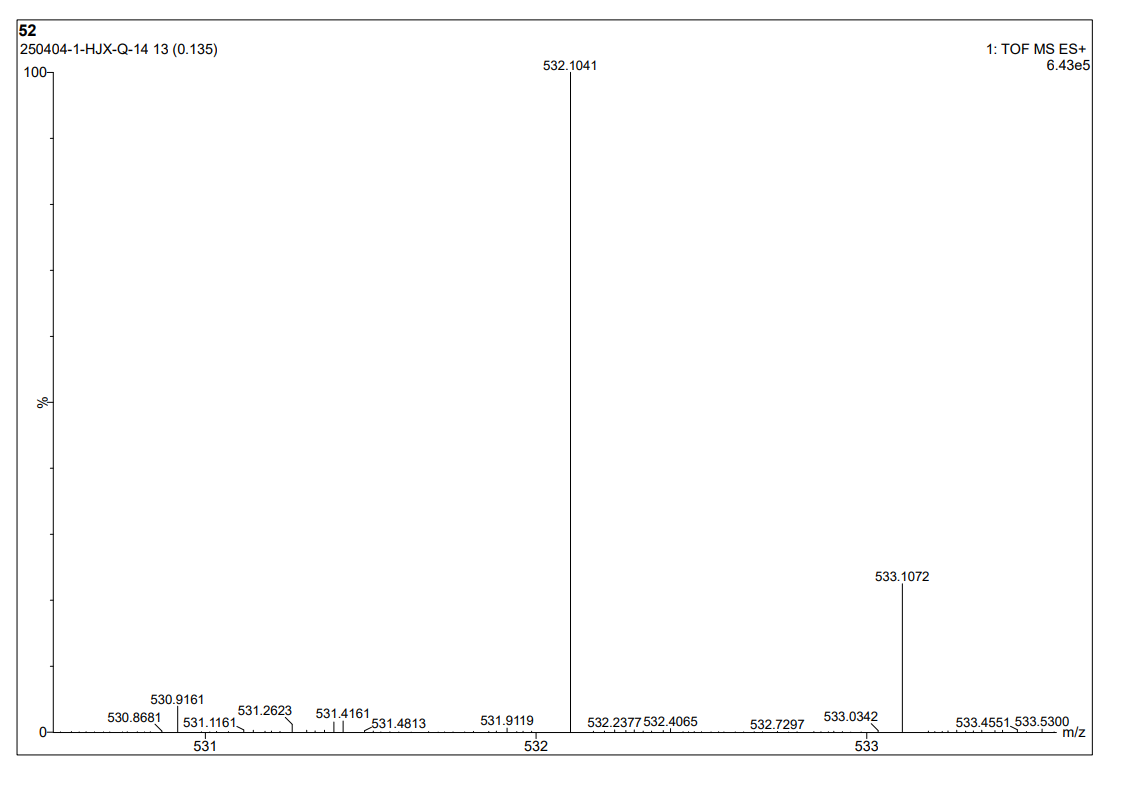


图S1 14-1 HR Mass spectrum (ESI) of compound **3n**


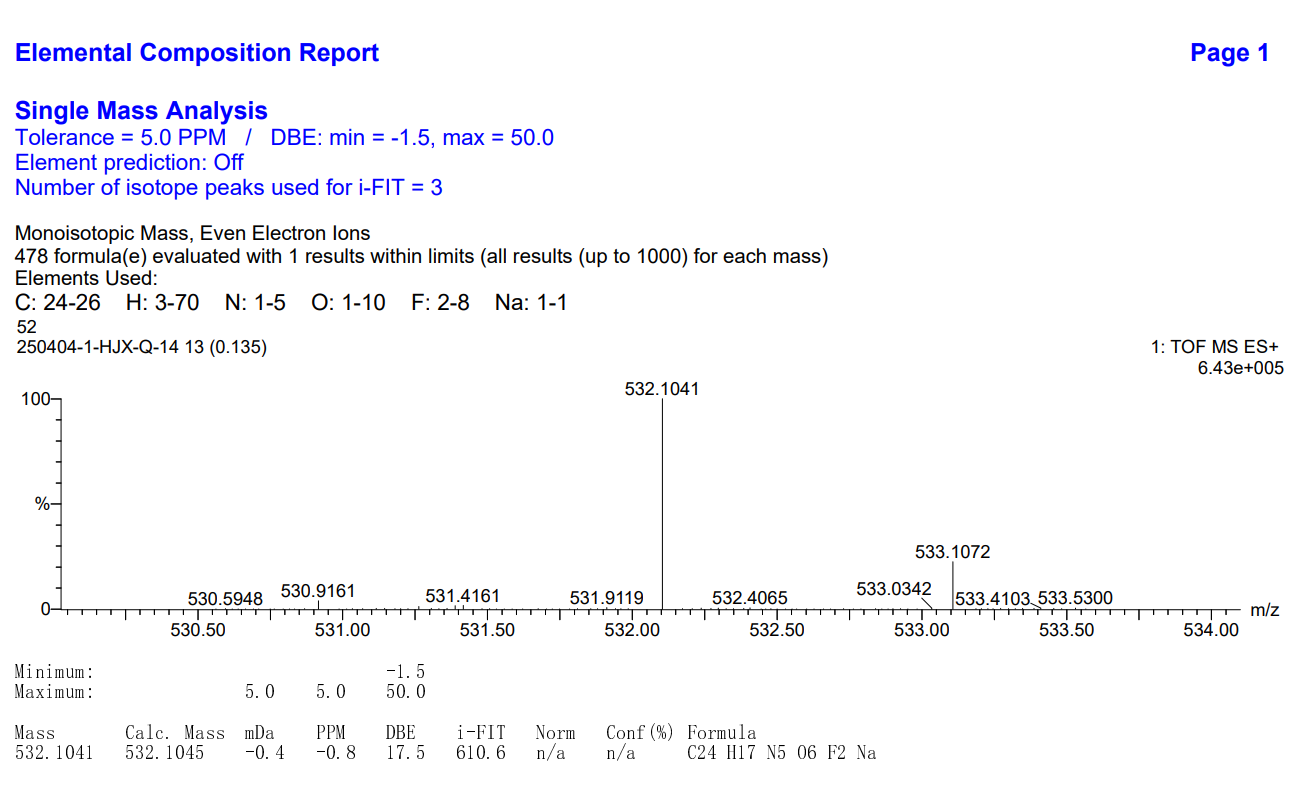


图S1 14-2 HR Mass spectrum (ESI) of compound **3n**


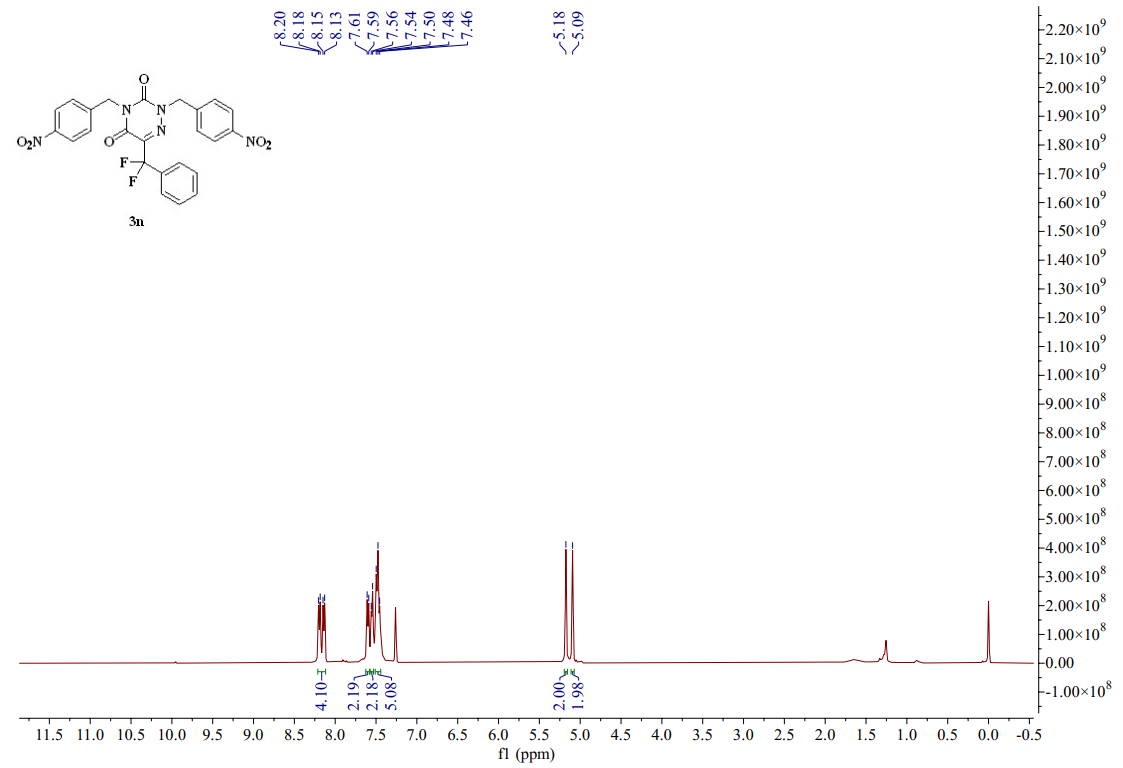


图S1 14-3  1H-NMR spectrum (CDCl3, 400 MHZ) of compound **3n**


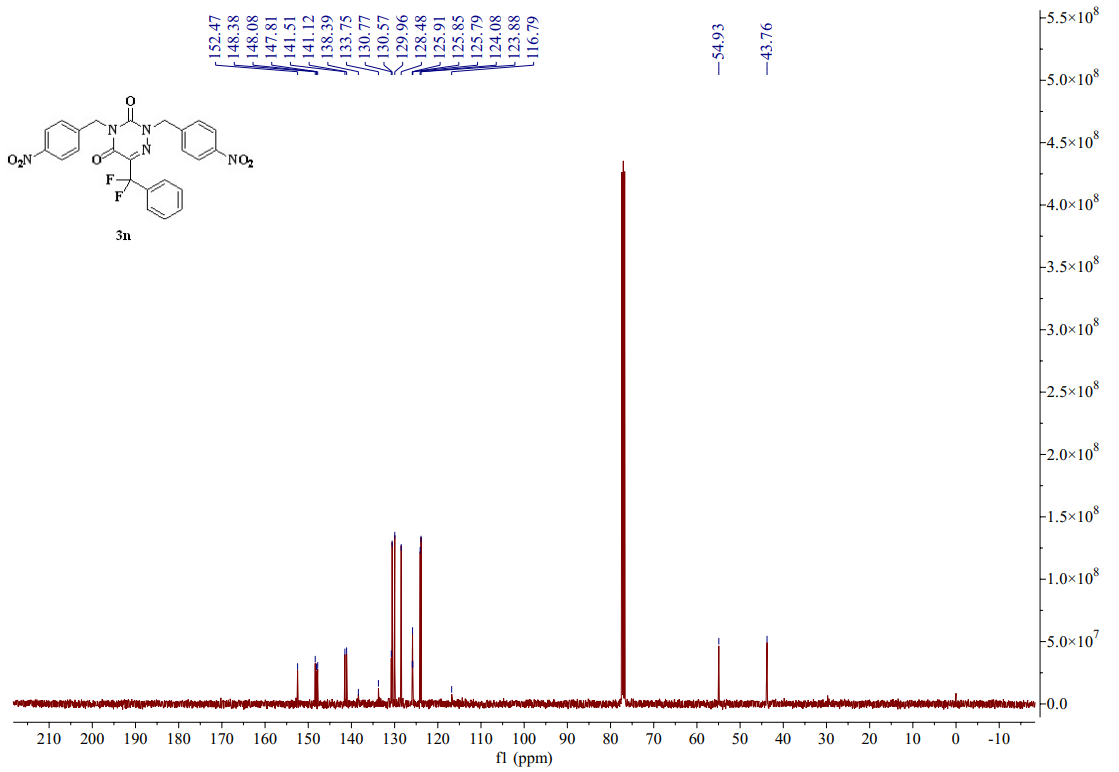


图S1 14-4  13C-NMR spectrum (CDCl3, 101 MHZ) of compound **3n**


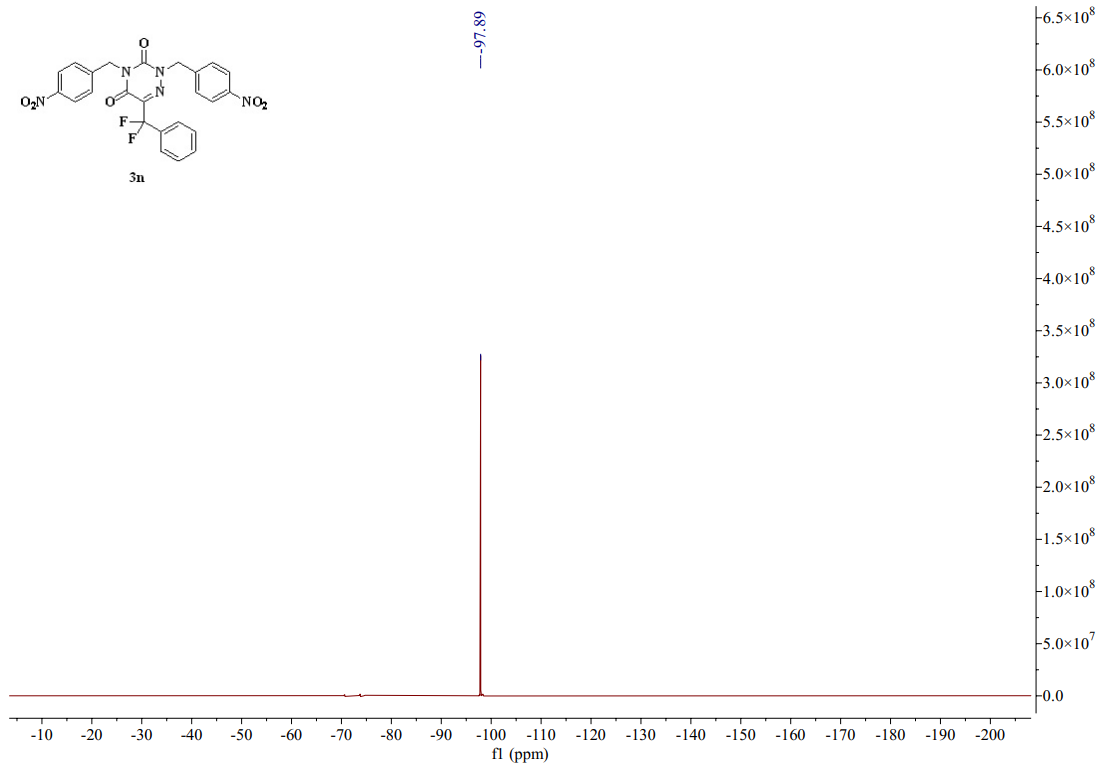


图S1 14-5  19F-NMR spectrum (CDCl3, 376 MHZ) of compound **3n**


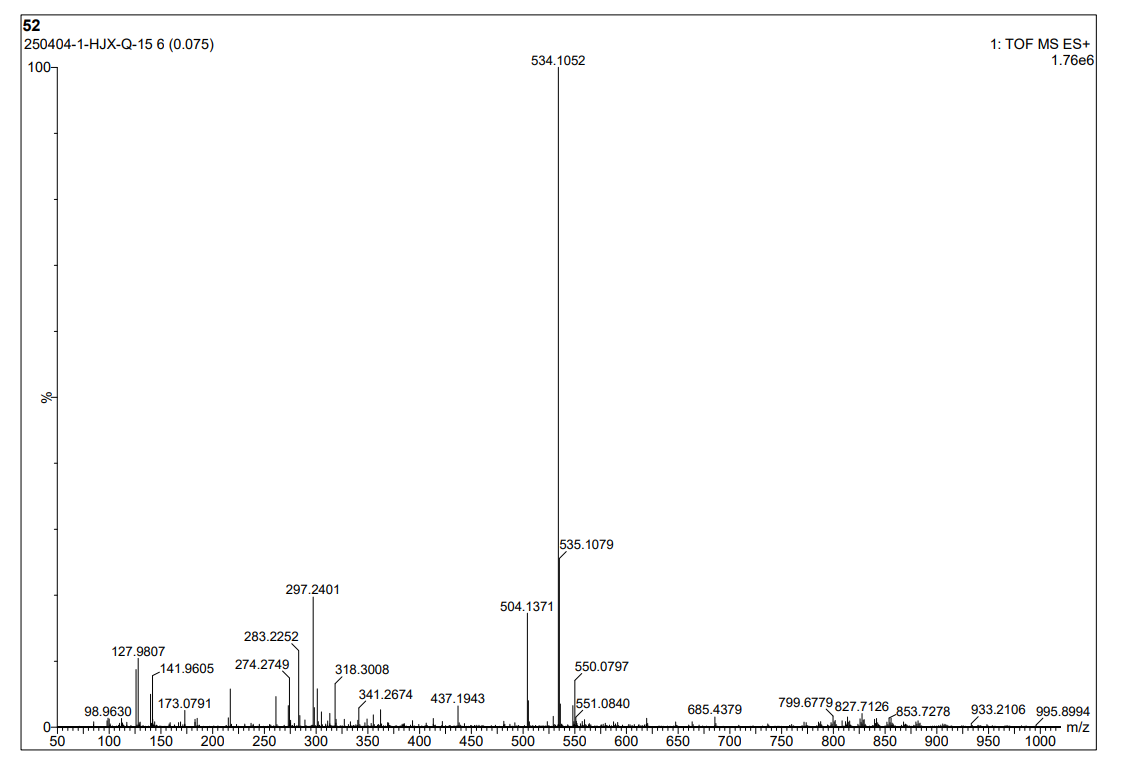


图S1 15-1 HR Mass spectrum (ESI) of compound **3o**


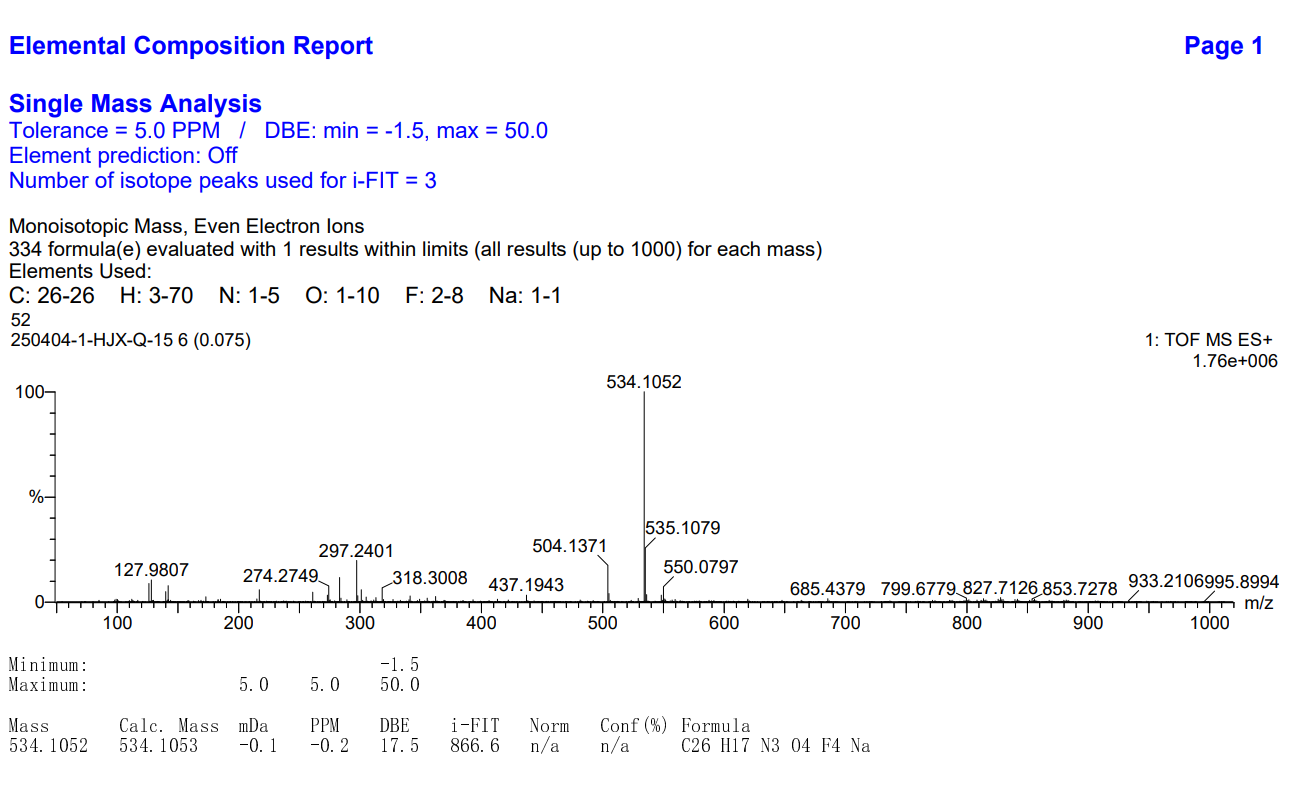


图S1 15-2 HR Mass spectrum (ESI) of compound **3o**


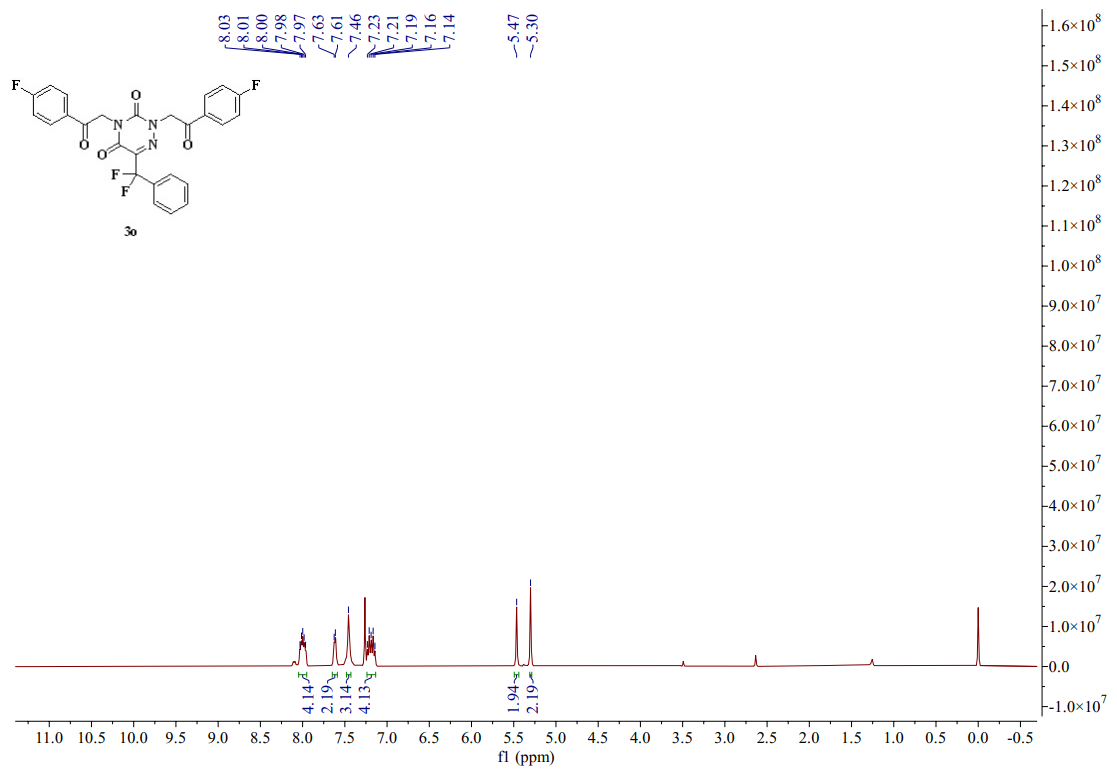


图S1 15-3  1H-NMR spectrum (CDCl3, 400 MHZ) of compound **3o**


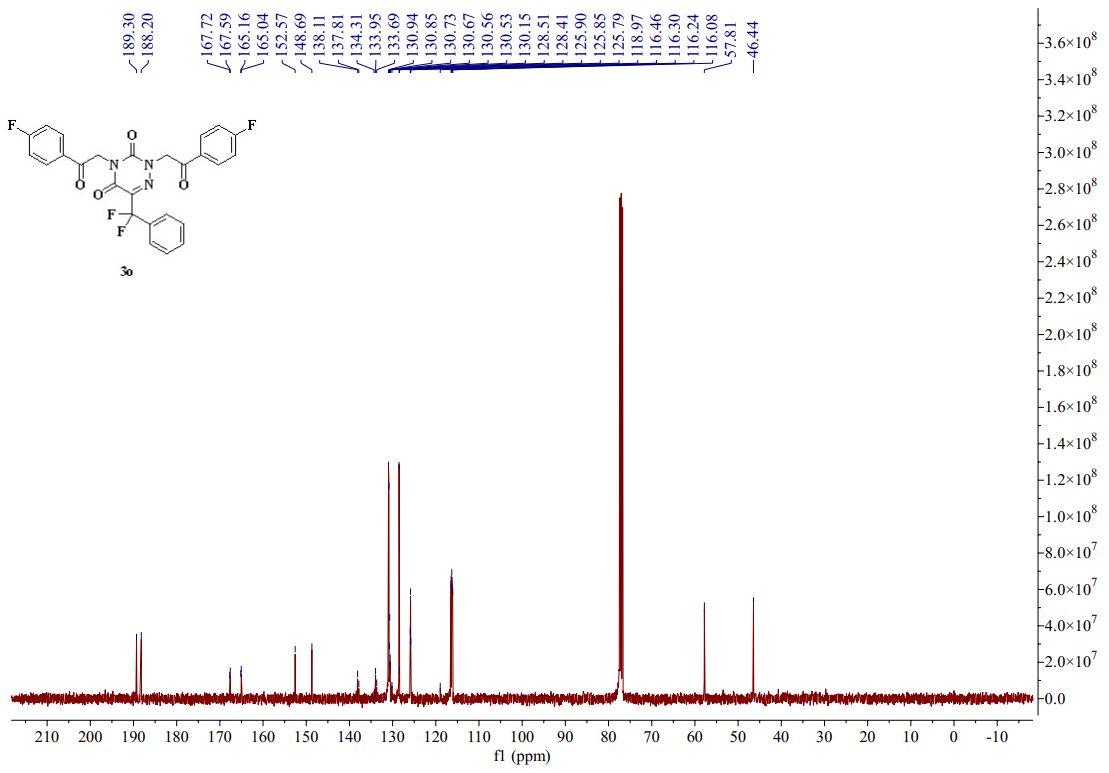


图S1 15-4  13C-NMR spectrum (CDCl3, 101 MHZ) of compound **3o**


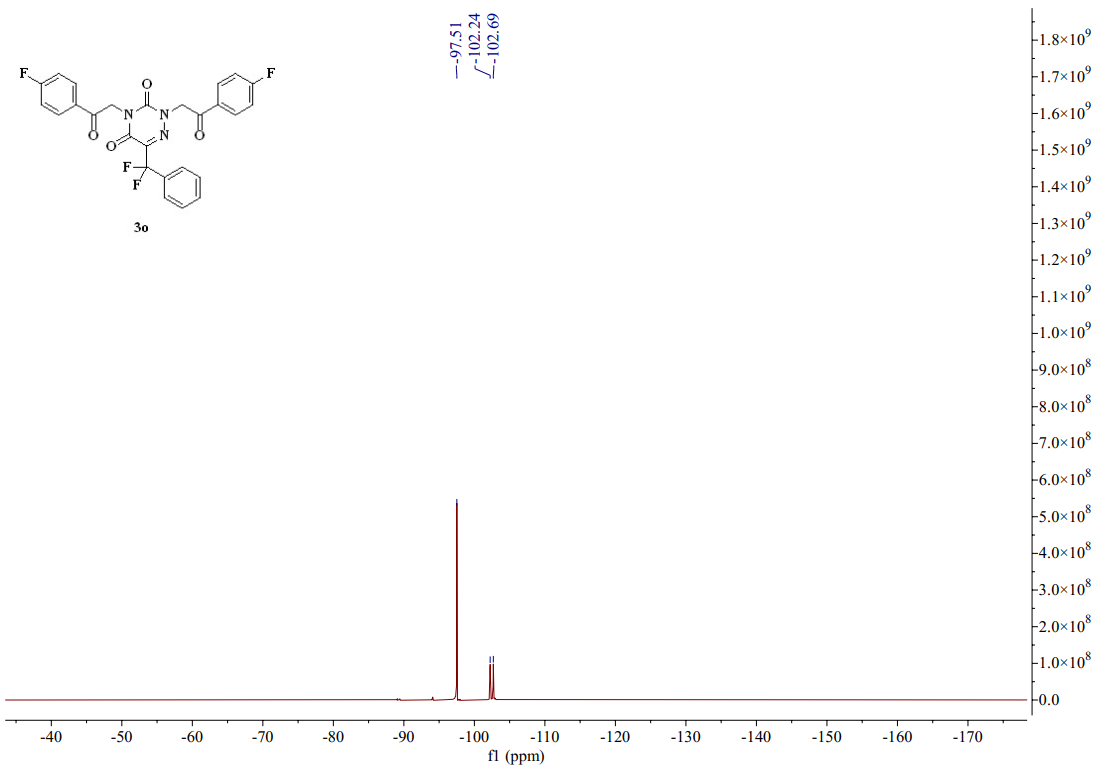


图S1 15-5  19F-NMR spectrum (CDCl3, 376 MHZ) of compound **3o**


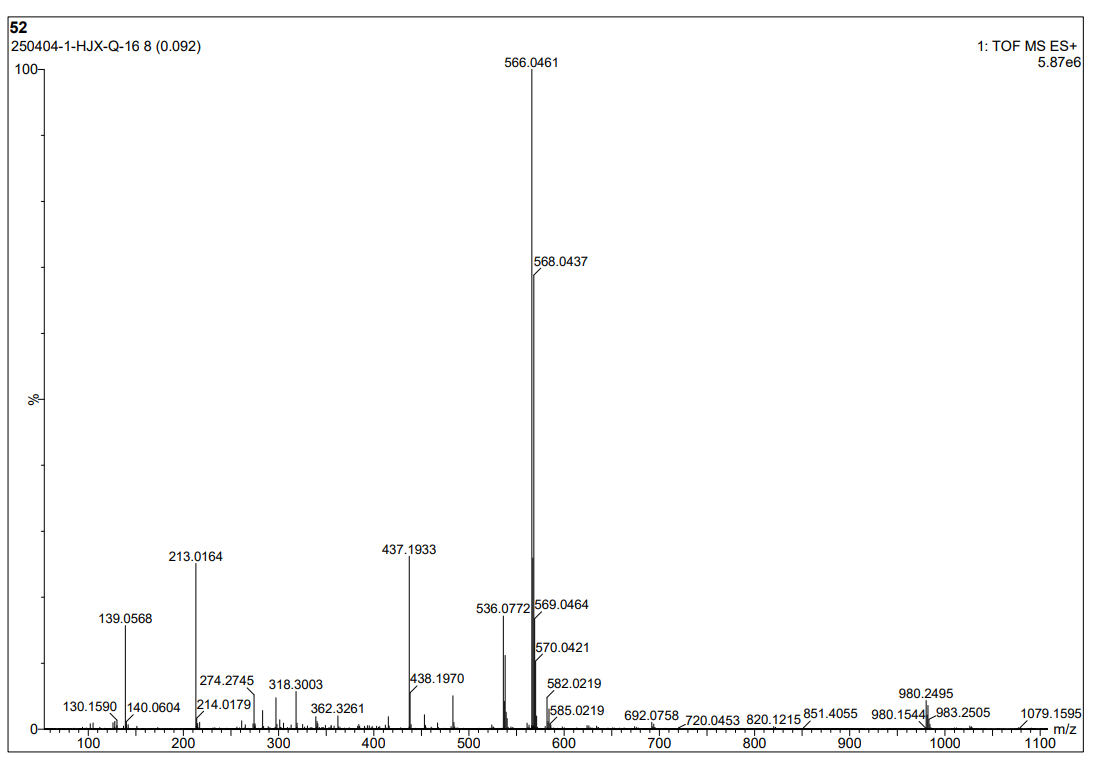


图S1 16-1 HR Mass spectrum (ESI) of compound **3p**


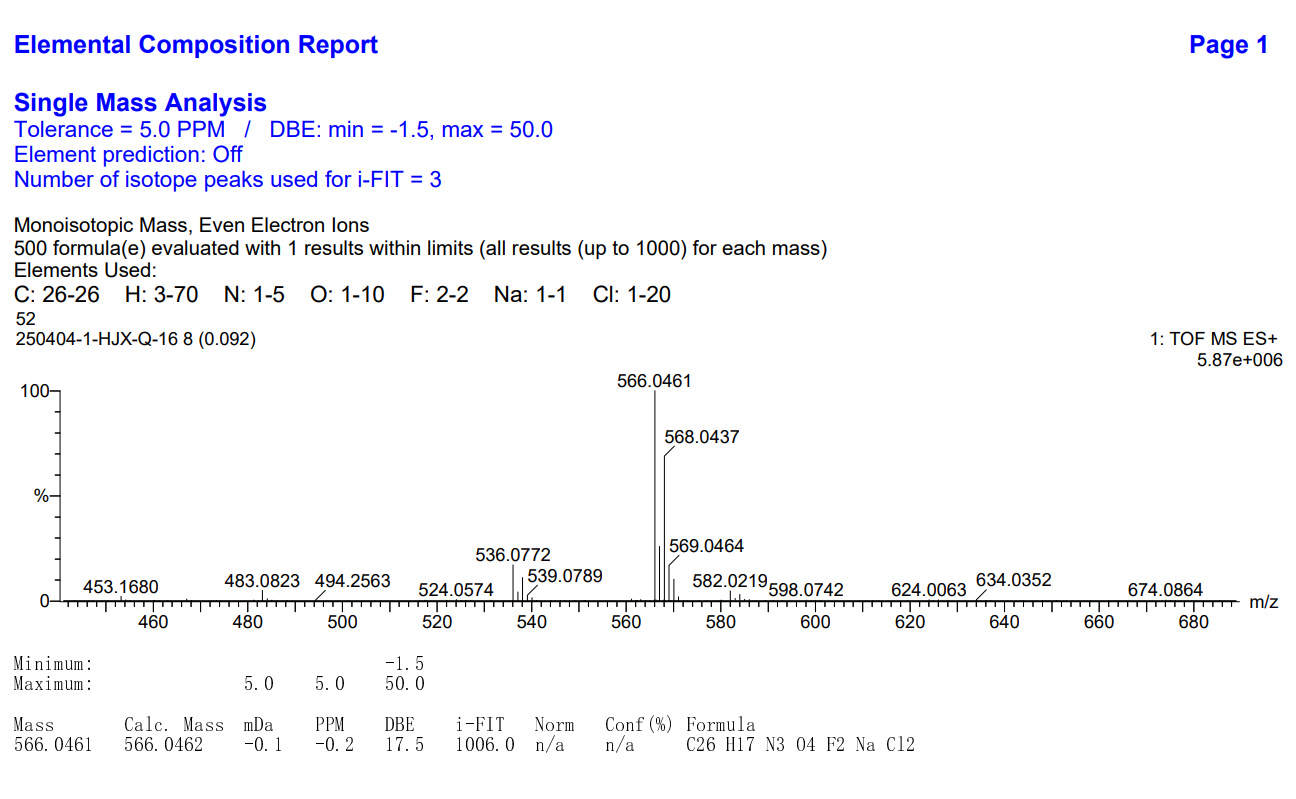


图S1 16-2 HR Mass spectrum (ESI) of compound **3p**


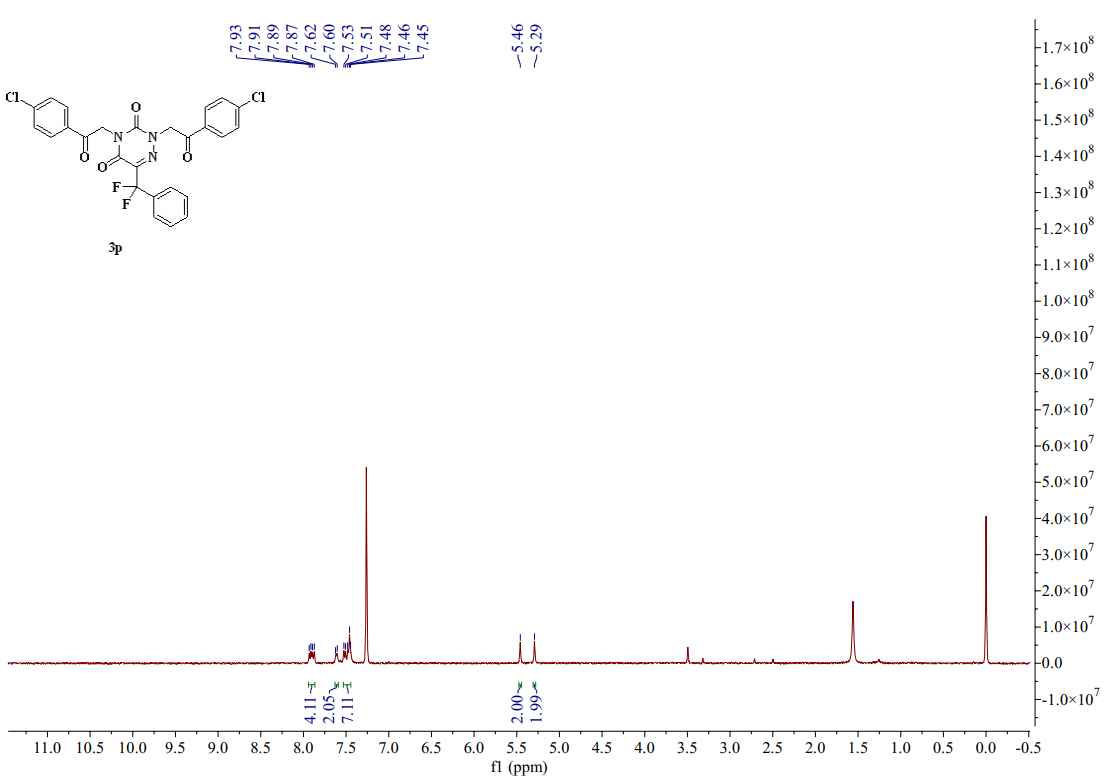


图S1 16-3  1H-NMR spectrum (CDCl3, 400 MHZ) of compound **3p**


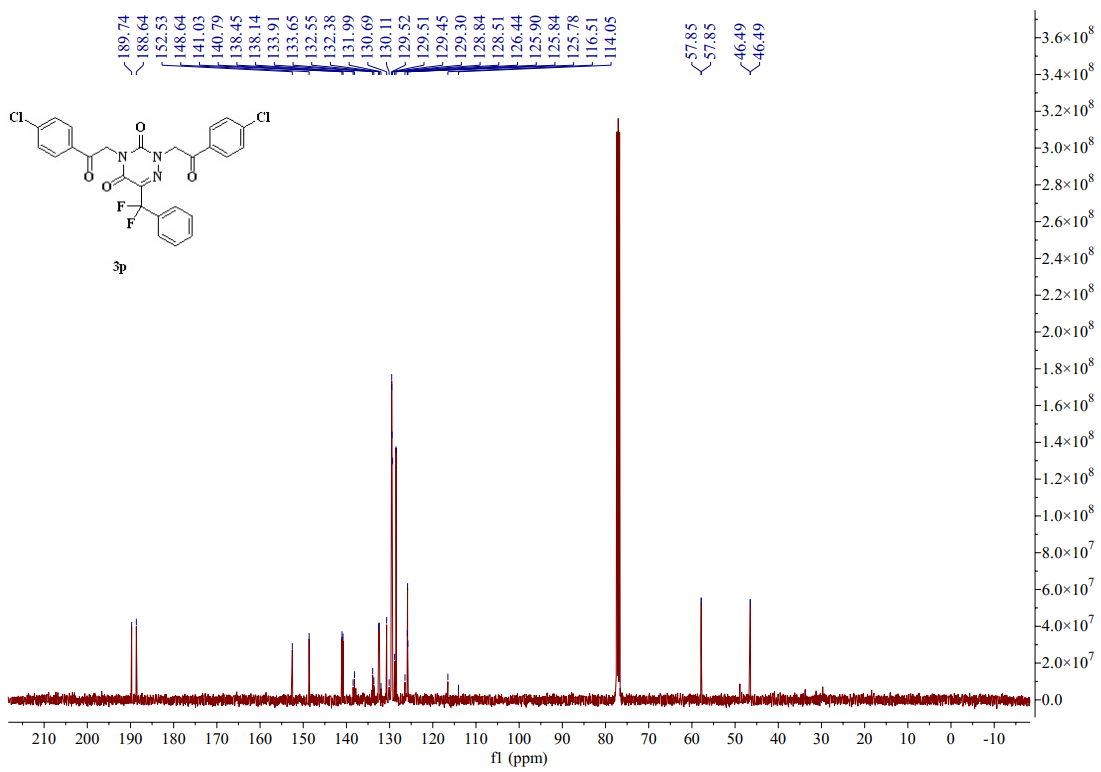


图S1 16-4  13C-NMR spectrum (CDCl3, 101 MHZ) of compound **3p**


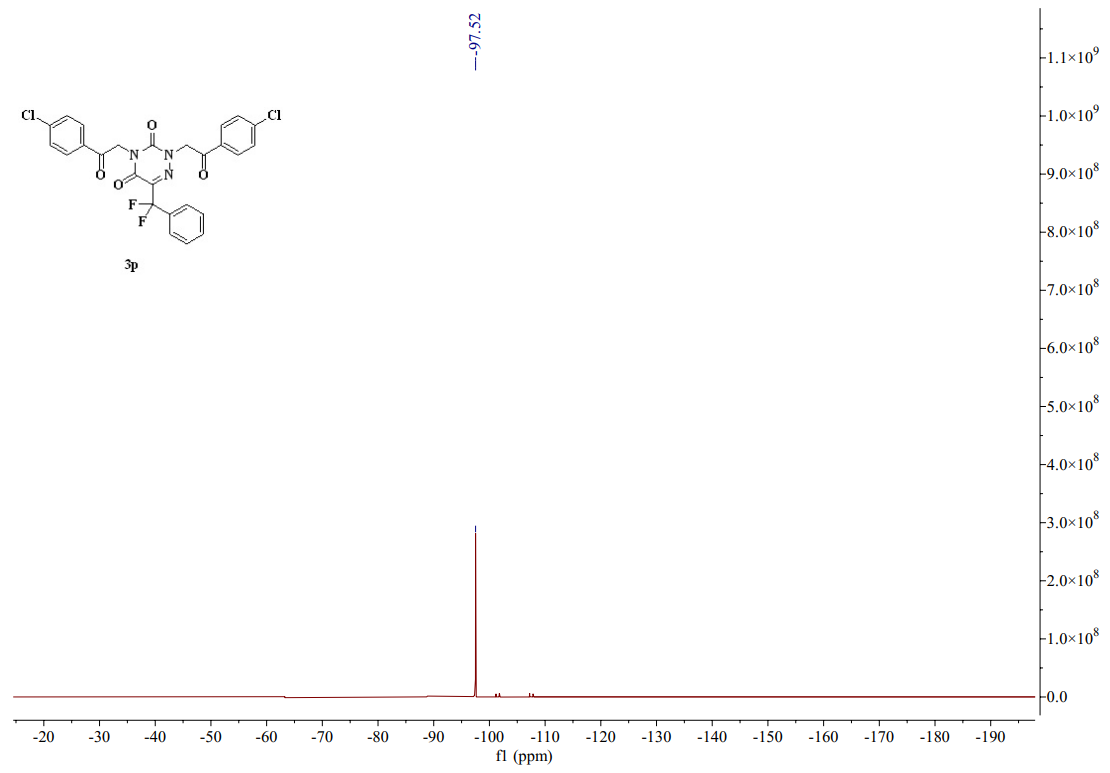


图S1 16-5  19F-NMR spectrum (CDCl3, 376 MHZ) of compound **3p**


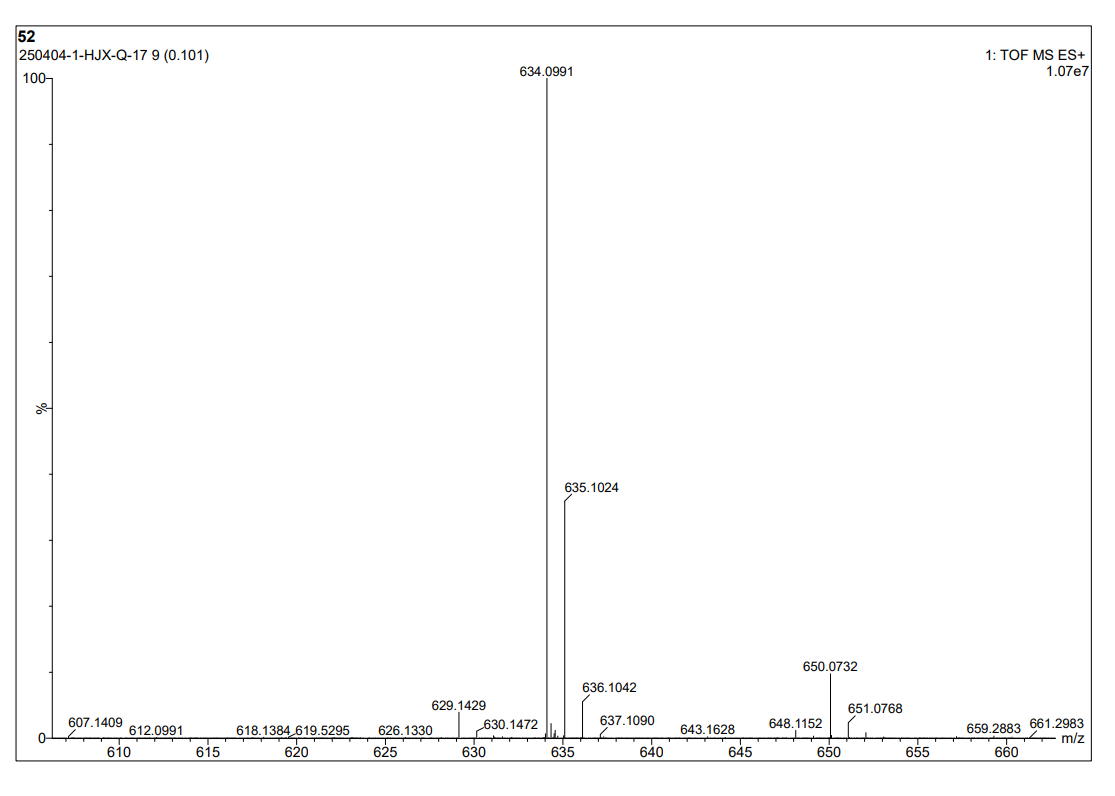


图S1 17-1 HR Mass spectrum (ESI) of compound **3q**


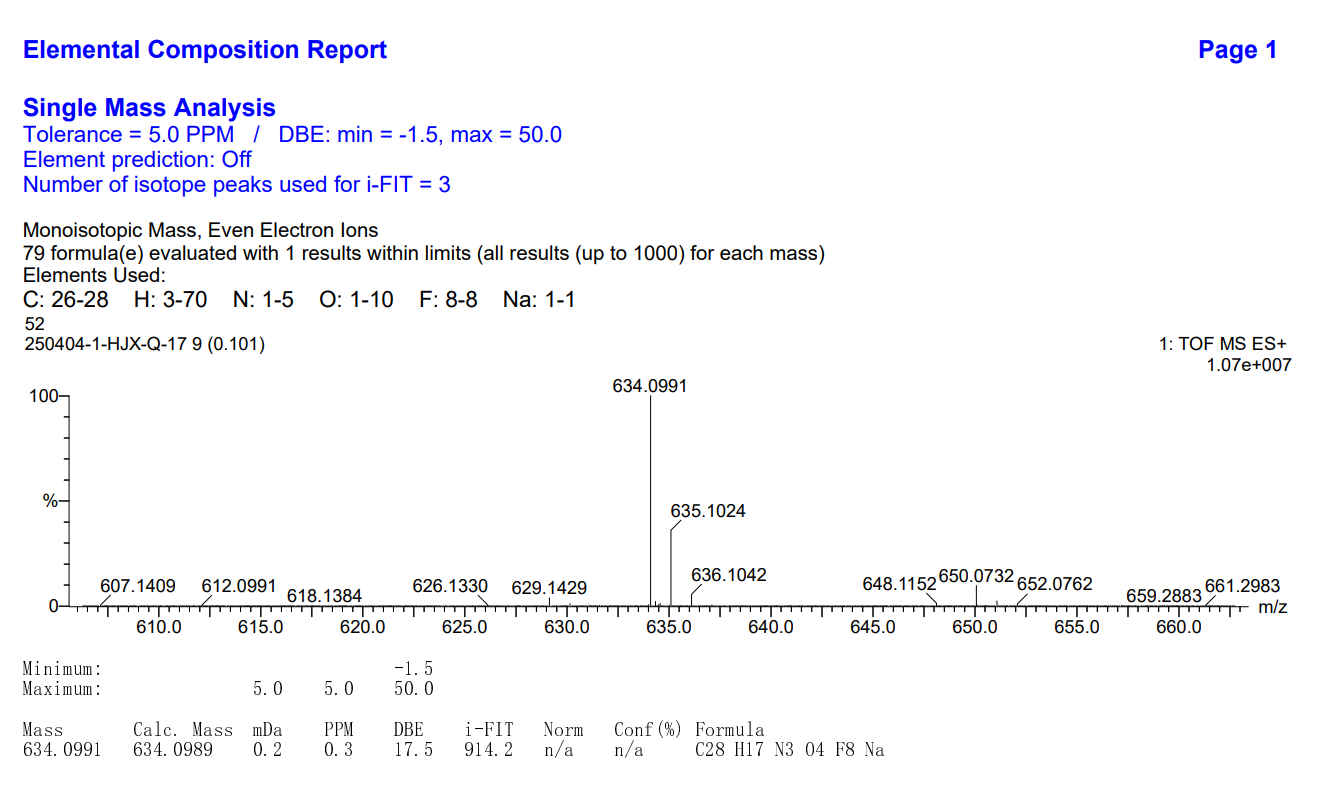


图S1 17-2 HR Mass spectrum (ESI) of compound **3q**


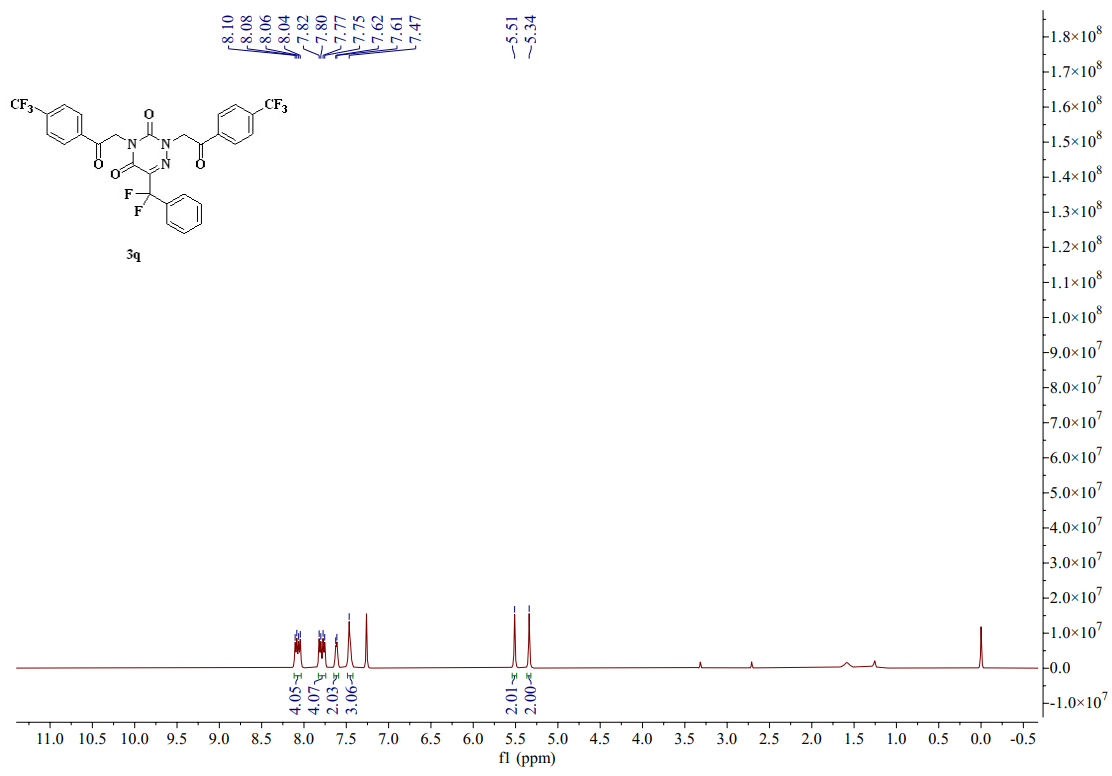


图S1 17-3  1H-NMR spectrum (CDCl3, 400 MHZ) of compound **3q**


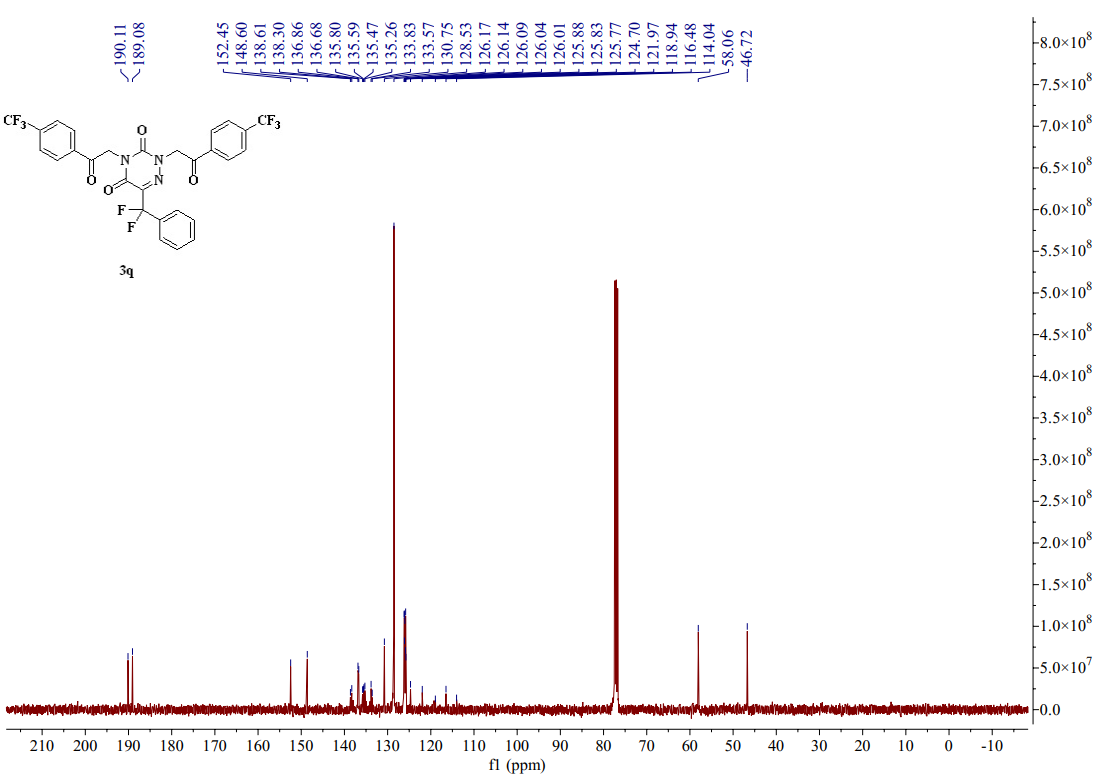


图S1 17-4  13C-NMR spectrum (CDCl3, 101 MHZ) of compound **3q**


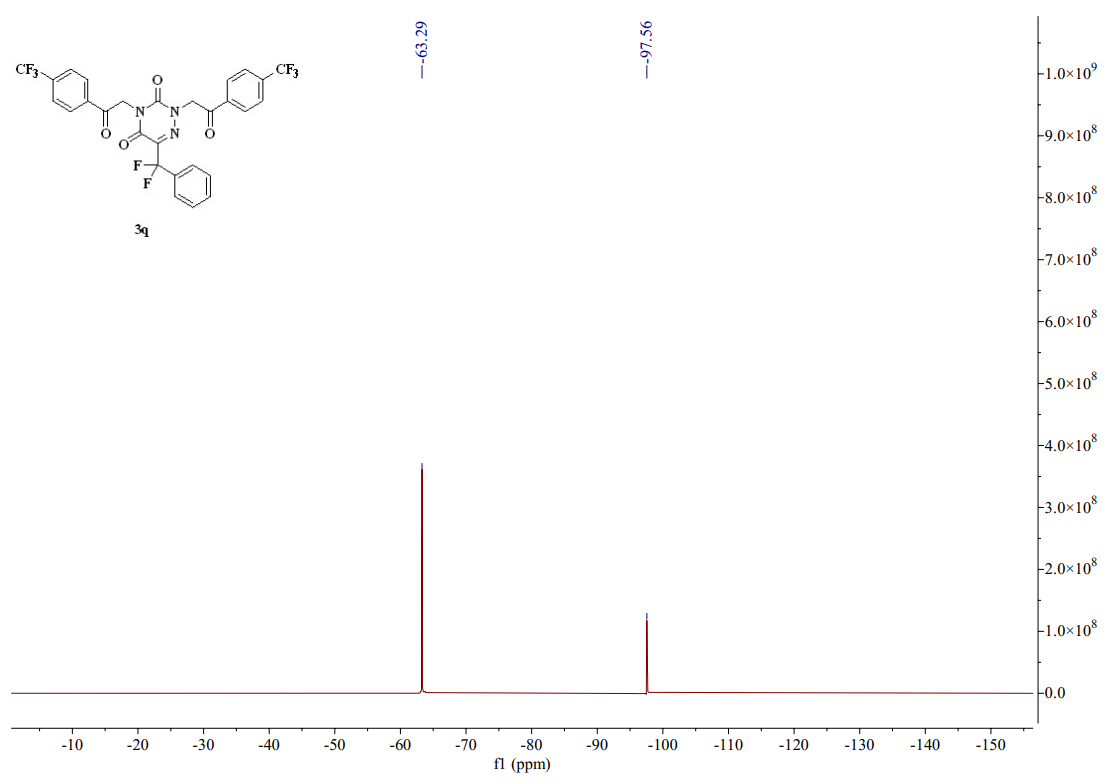


图S1 17-5  19F-NMR spectrum (CDCl3, 376 MHZ) of compound **3q**


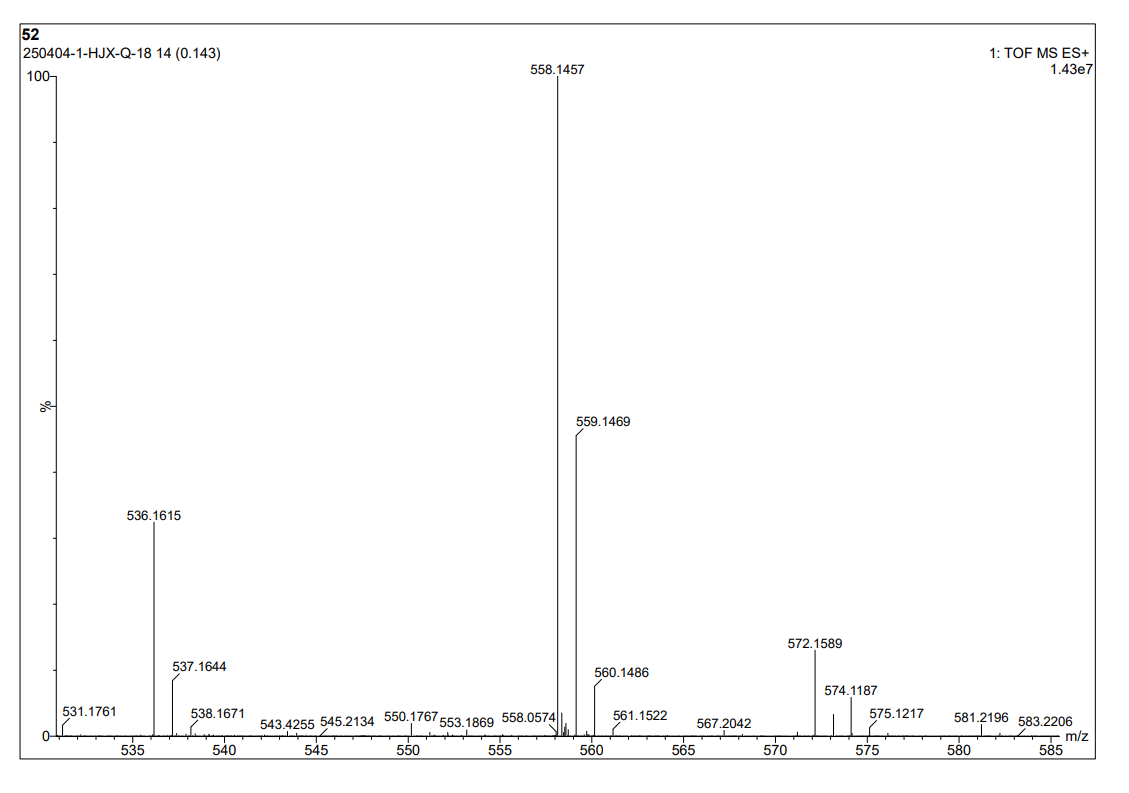


图S1 18-1 HR Mass spectrum (ESI) of compound **3r**


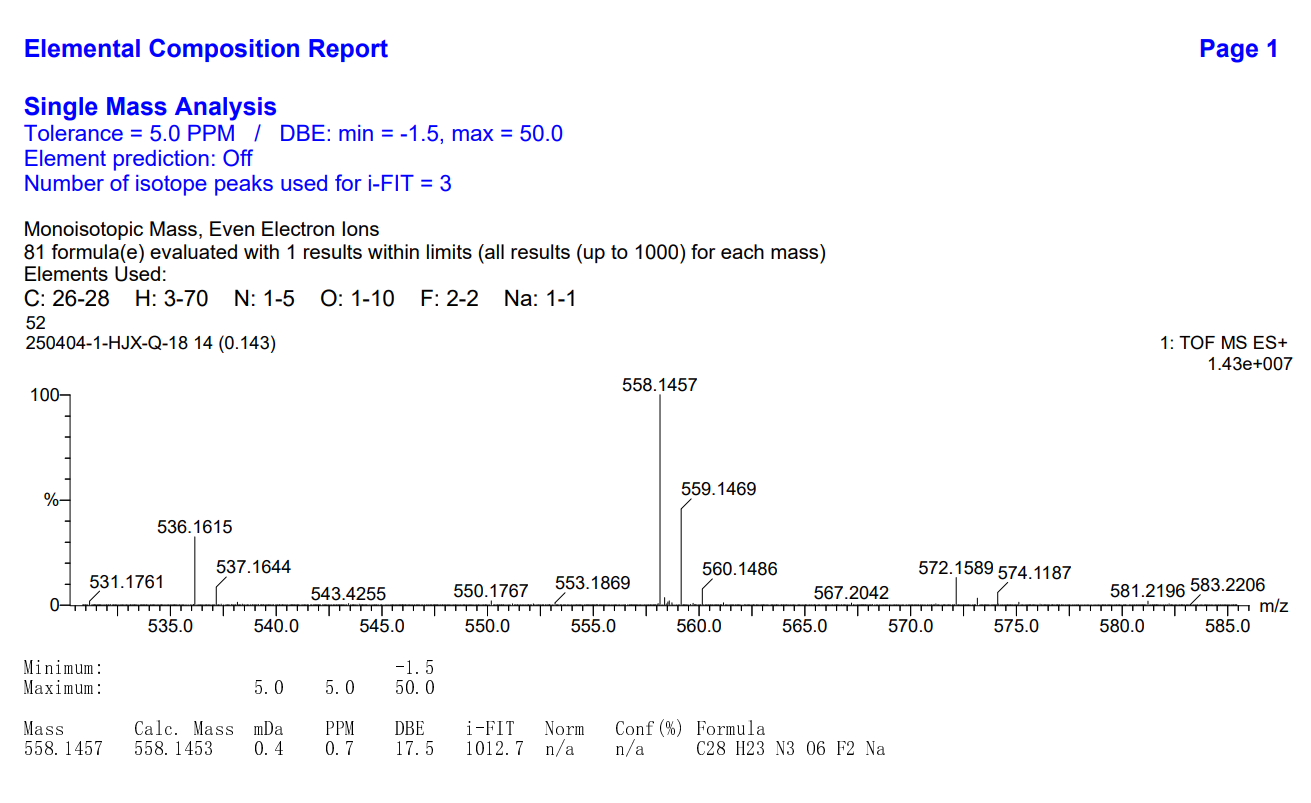


图S1 18-2 HR Mass spectrum (ESI) of compound **3r**


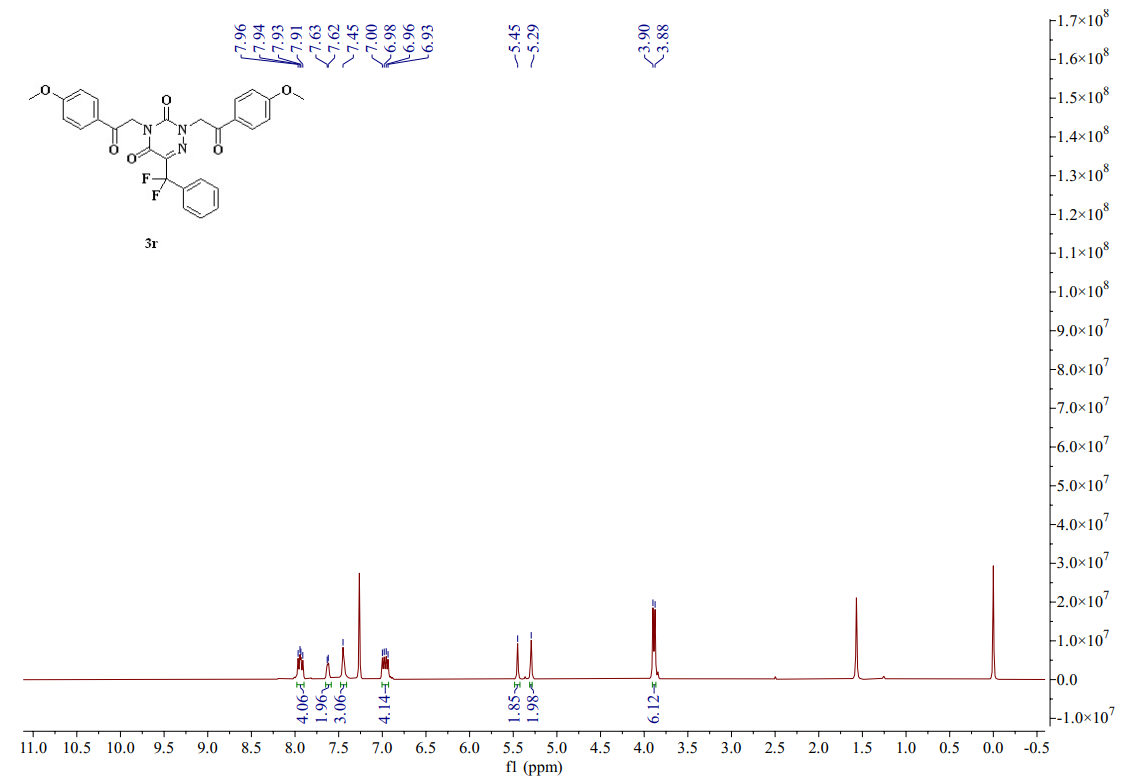


图S1 18-3  1H-NMR spectrum (CDCl3, 400 MHZ) of compound **3r**


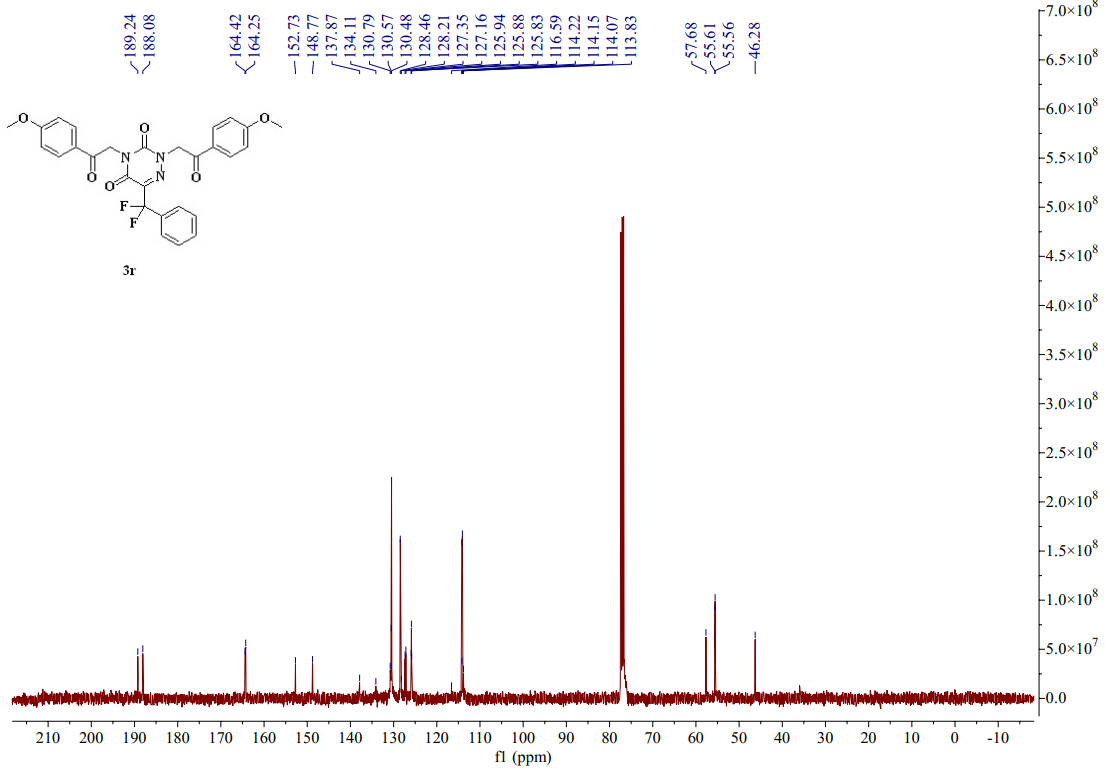


图S1 18-4  13C-NMR spectrum (CDCl3, 101 MHZ) of compound **3r**


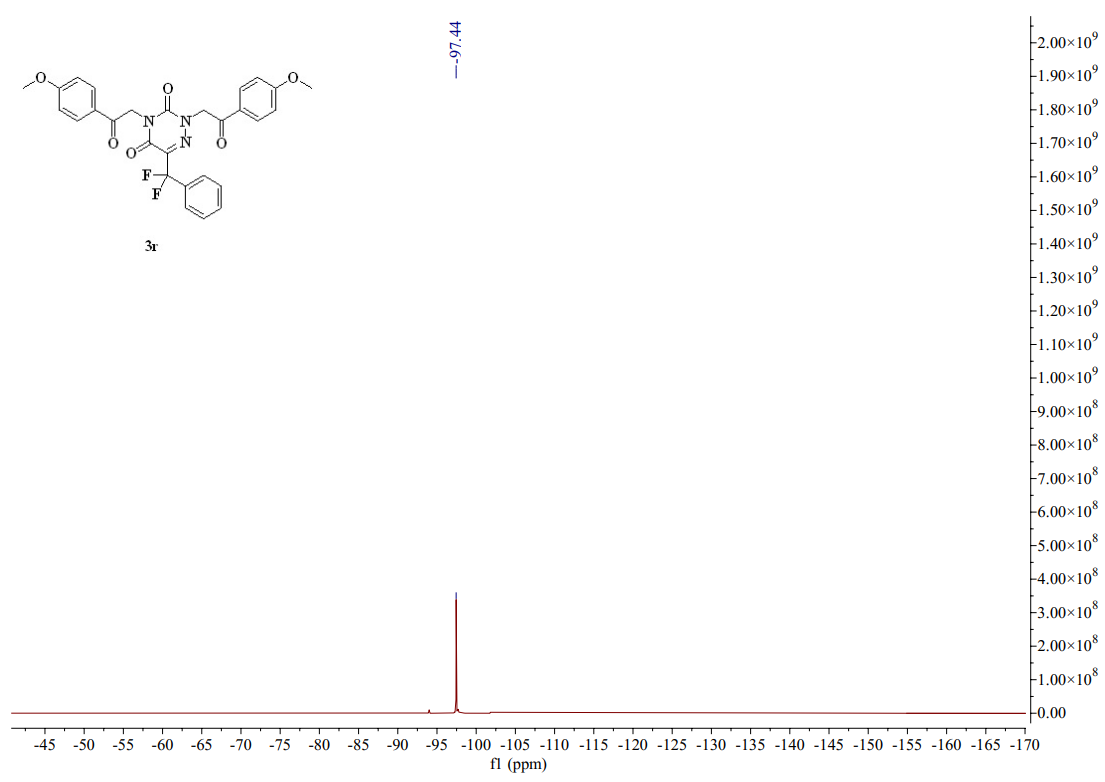


图S1 18-5  19F-NMR spectrum (CDCl3, 376 MHZ) of compound **3r**


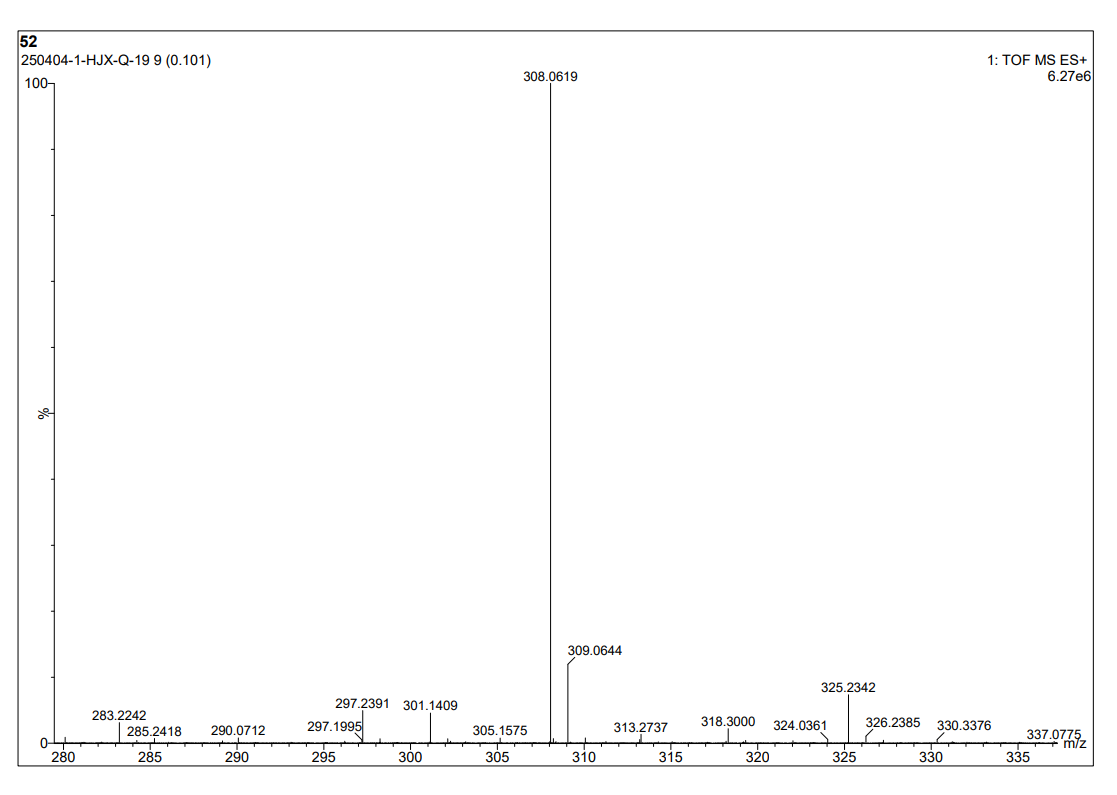


图S1 19-1 HR Mass spectrum (ESI) of compound **3s**


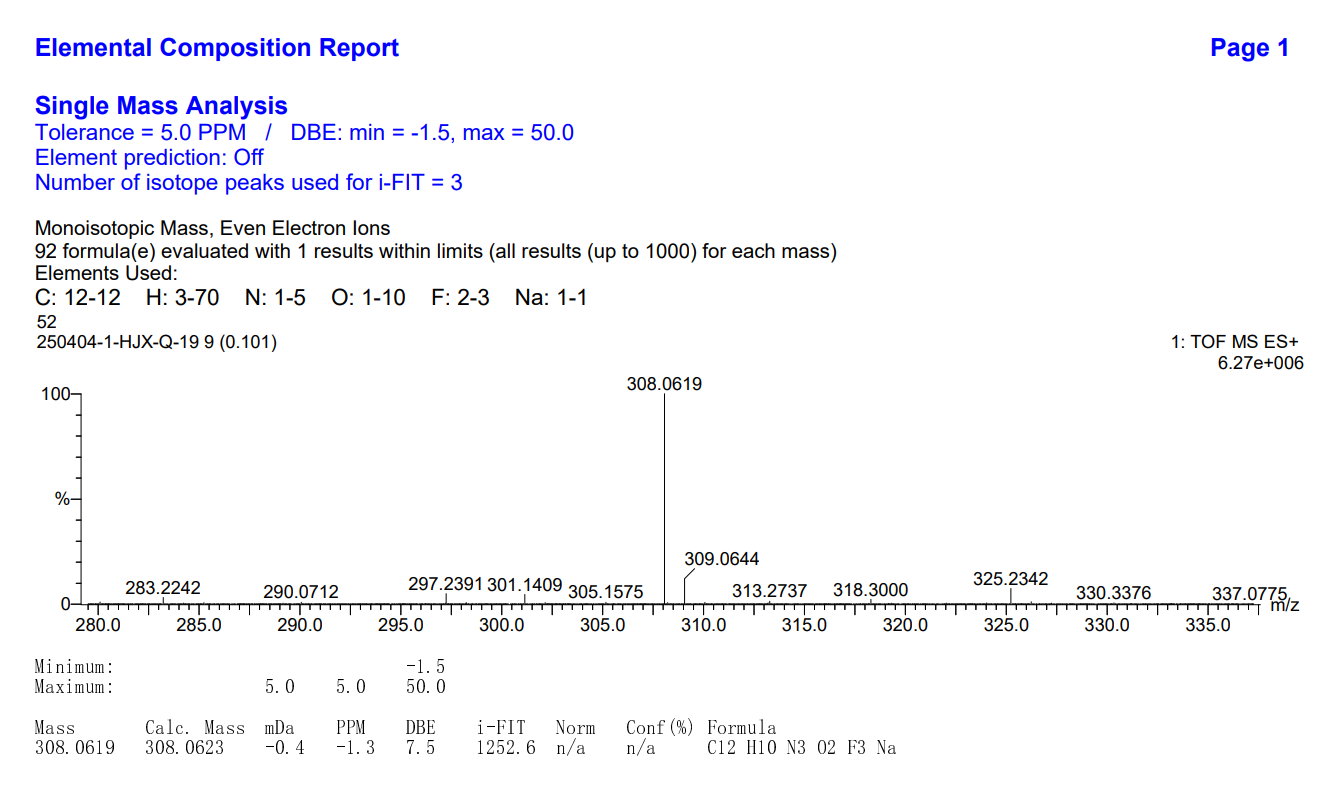


图S1 19-2 HR Mass spectrum (ESI) of compound **3s**


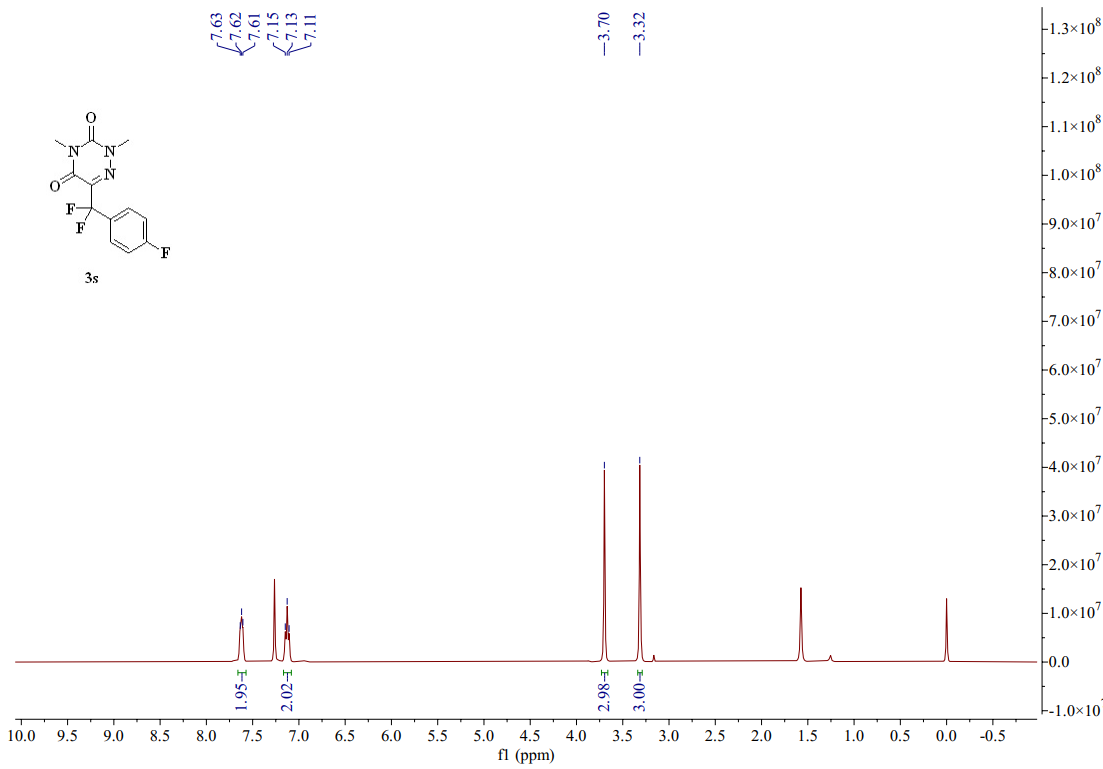


图S1 19-3  1H-NMR spectrum (CDCl3, 400 MHZ) of compound **3s**


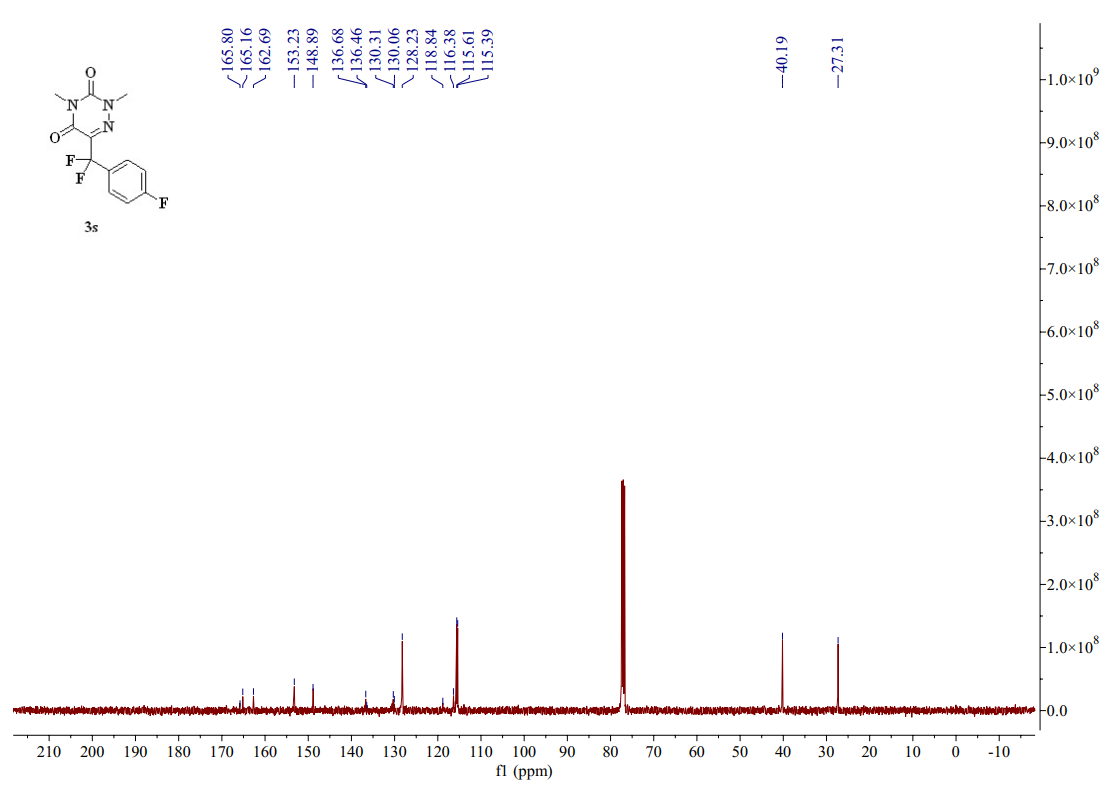


图S1 19-4  13C-NMR spectrum (CDCl3, 101 MHZ) of compound **3s**


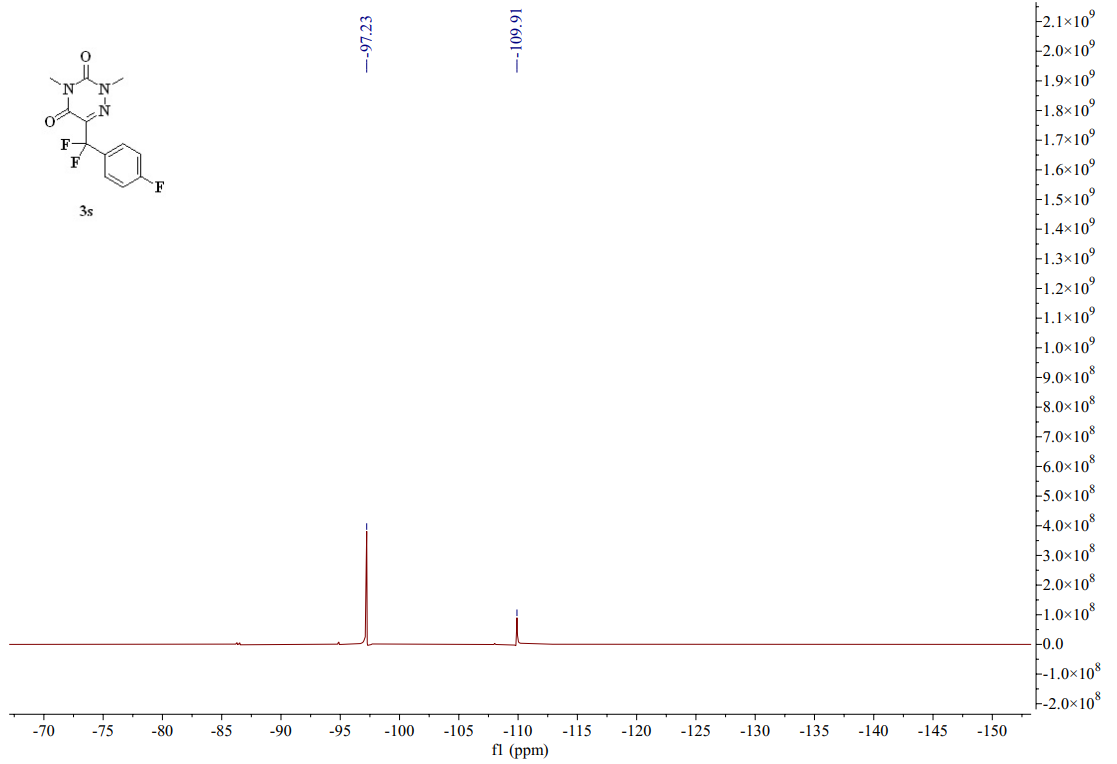


图S1 19-5  19F-NMR spectrum (CDCl3, 376 MHZ) of compound **3s**


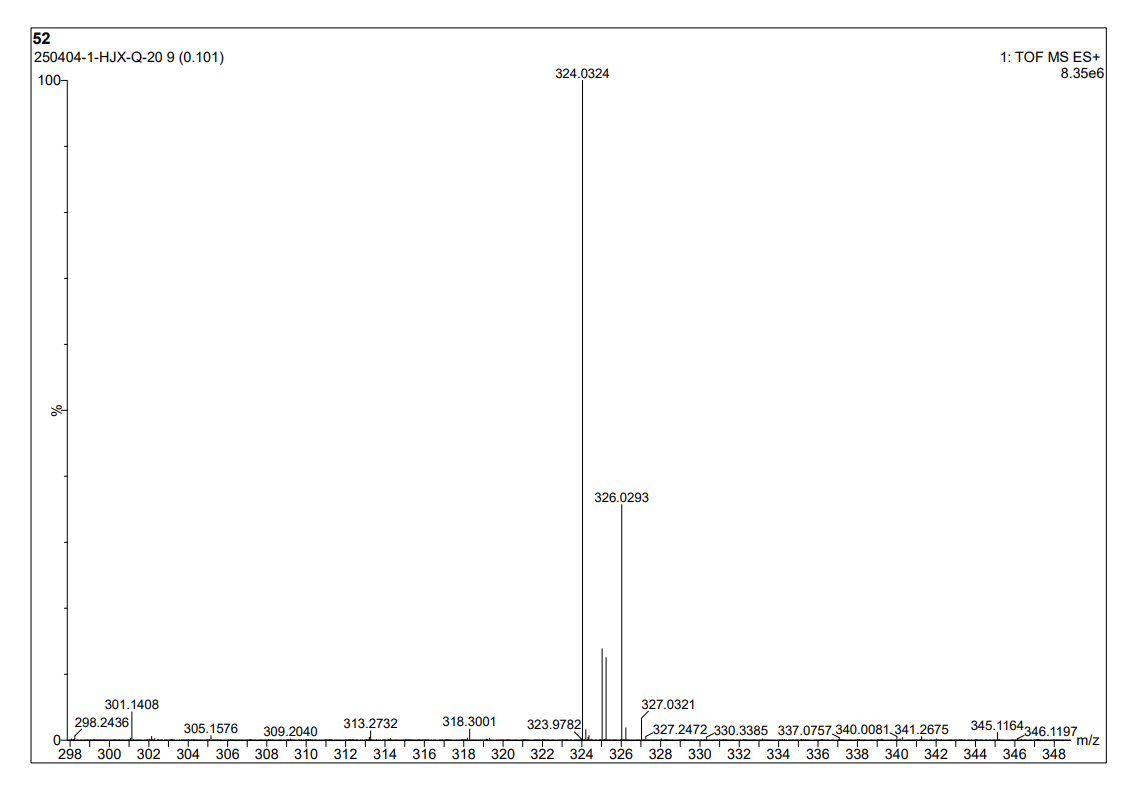


图S1 20-1 HR Mass spectrum (ESI) of compound **3t**


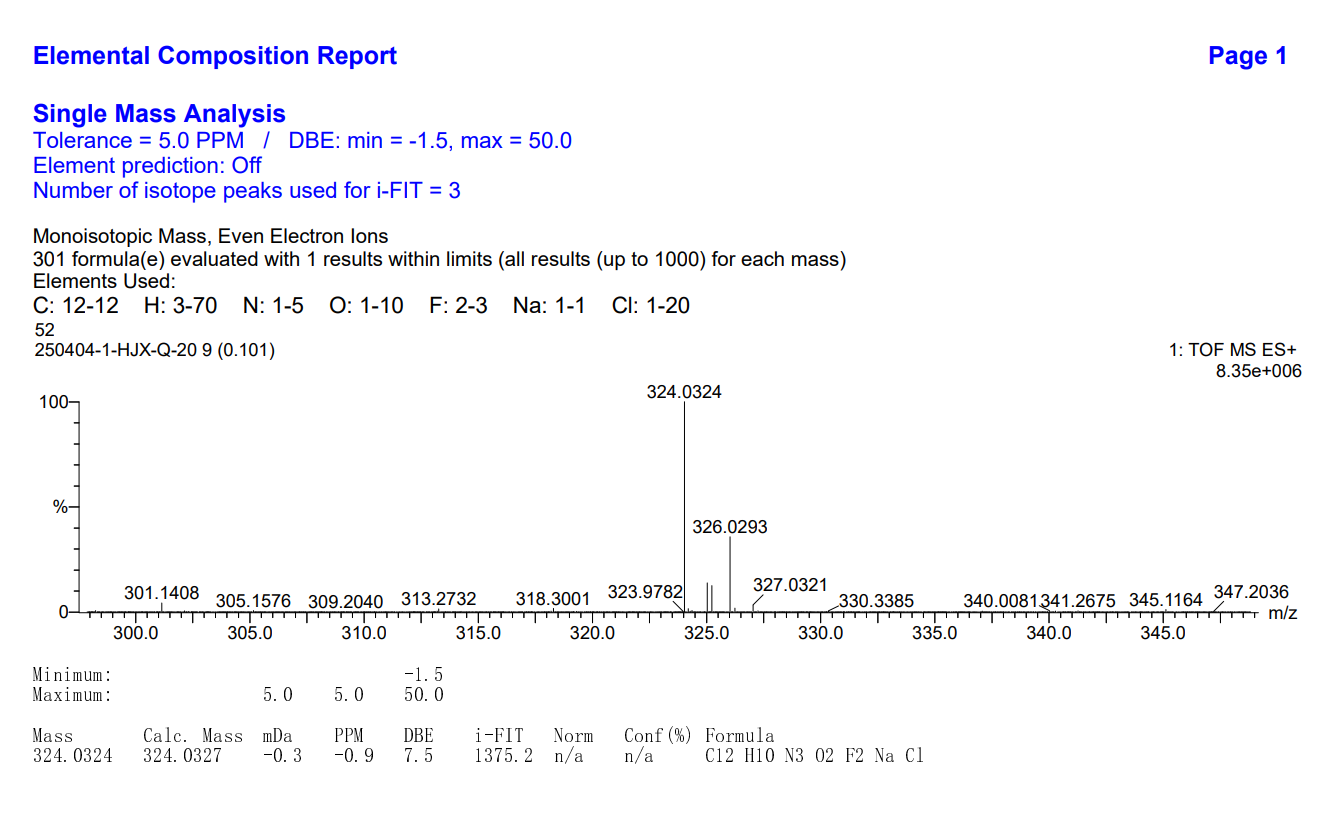


图S1 20-2 HR Mass spectrum (ESI) of compound **3t**


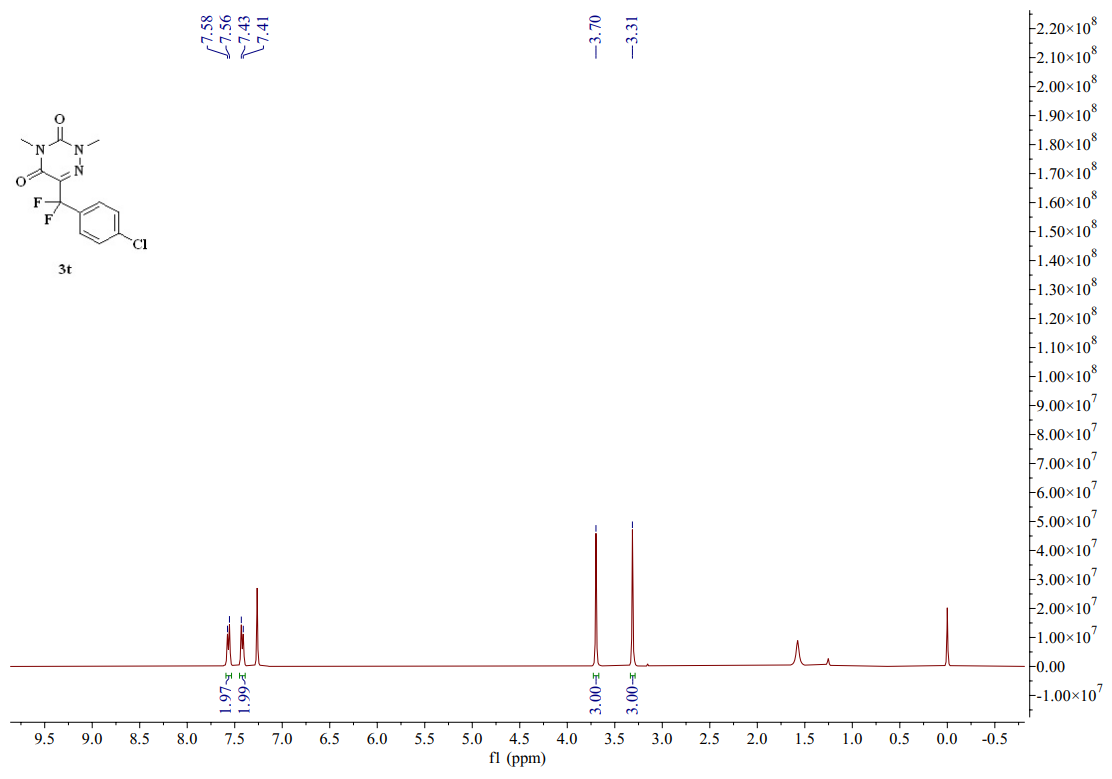


图S1 20-3  1H-NMR spectrum (CDCl3, 400 MHZ) of compound **3t**


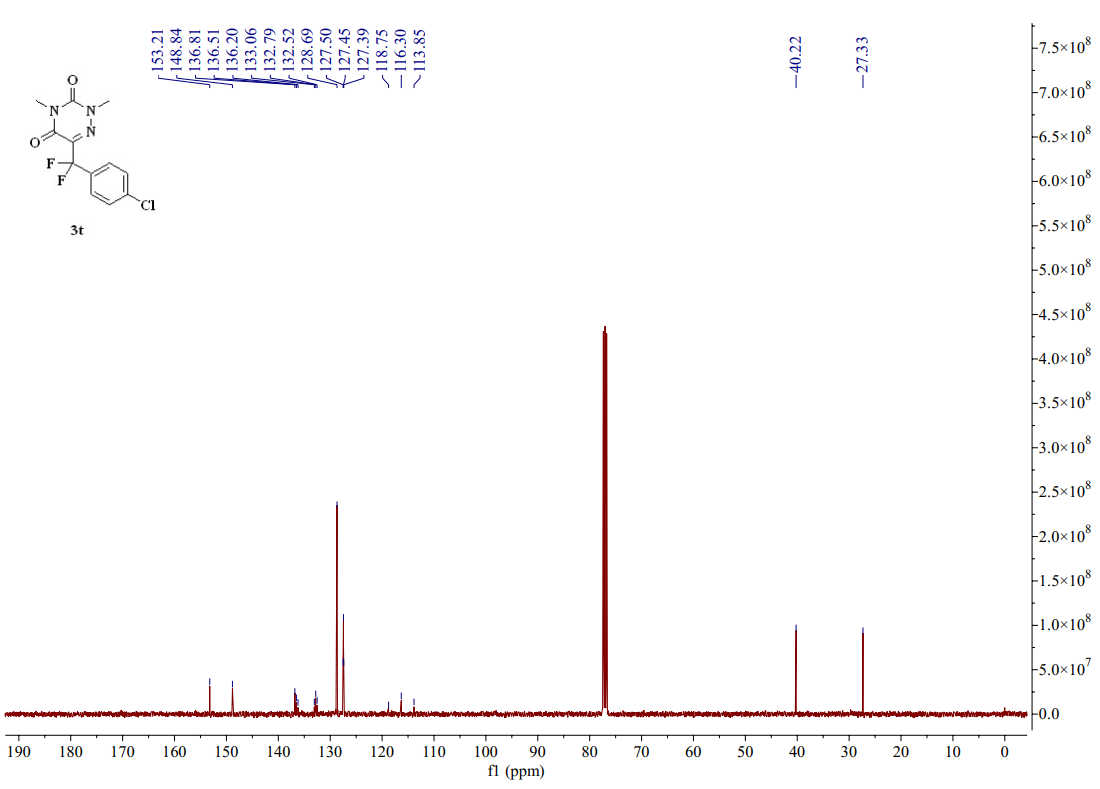


图S1 20-4  13C-NMR spectrum (CDCl3, 101 MHZ) of compound **3t**


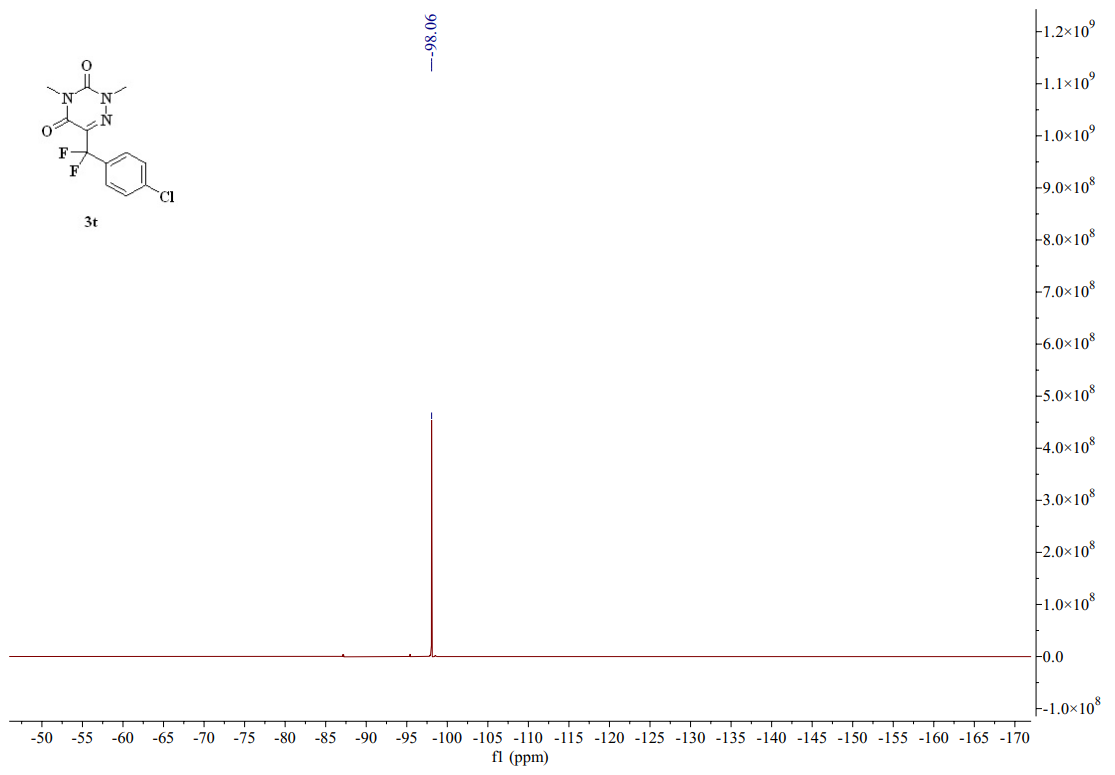


图S1 20-5  19F-NMR spectrum (CDCl3, 376 MHZ) of compound **3t**

图S1 21-1 HR Mass spectrum (ESI) of compound **3u**

图S1 21-2 HR Mass spectrum (ESI) of compound **3u**

图S1 21-3  1H-NMR spectrum (CDCl3, 400 MHZ) of compound **3u**

图S1 21-4  13C-NMR spectrum (CDCl3, 101 MHZ) of compound **3u**

图S1 21-5  19F-NMR spectrum (CDCl3, 376 MHZ) of compound **3u**

图S1 22-1 HR Mass spectrum (ESI) of compound **3v**

图S1 22-2 HR Mass spectrum (ESI) of compound **3v**

图S1 22-3  1H-NMR spectrum (CDCl3, 400 MHZ) of compound **3v**

图S1 22-4  13C-NMR spectrum (CDCl3, 101 MHZ) of compound **3v**

图S1 22-5  19F-NMR spectrum (CDCl3, 376 MHZ) of compound **3v**

图S1 23-1 HR Mass spectrum (ESI) of compound **3w**

图S1 23-2 HR Mass spectrum (ESI) of compound **3w**

图S1 23-3  1H-NMR spectrum (CDCl3, 400 MHZ) of compound **3w**

图S1 23-4  13C-NMR spectrum (CDCl3, 101 MHZ) of compound **3w**

图S1 23-5  19F-NMR spectrum (CDCl3, 376 MHZ) of compound **3w**

图S1 24-1 HR Mass spectrum (ESI) of compound **3x**

图S1 24-2 HR Mass spectrum (ESI) of compound **3x**

图S1 24-3  1H-NMR spectrum (CDCl3, 400 MHZ) of compound **3x**

图S1 24-4  13C-NMR spectrum (CDCl3, 101 MHZ) of compound **3x**

图S1 24-5  19F-NMR spectrum (CDCl3, 376 MHZ) of compound **3x**

图S1 25-1 HR Mass spectrum (ESI) of compound **3ad**

图S1 25-2 HR Mass spectrum (ESI) of compound **3ad**
